# Supplementary material for: Synthesis and Evaluation of GM2-Monophosphoryl Lipid A Conjugate as a Fully Synthetic Self-Adjuvant Cancer Vaccine
Source: PubMed Central journal article supplement (PMC5595996; doi:10.1038/s41598-017-11500-w), 2017-09-12
Supplement: 41598_2017_11500_MOESM1_ESM.pdf [file 41598_2017_11500_MOESM1_ESM.pdf]

## Supporting Information for

### Synthesis and Evaluation of GM2-Monophosphoryl Lipid A Conjugate as a Fully Synthetic Self-Adjuvant Cancer Vaccine

Zhifang Zhou,<sup>a,†</sup> Satadru Mandal,<sup>a,†</sup> Guochao Liao,<sup>a,b,†</sup> Jiatong Guo,<sup>a,c</sup> and Zhongwu Guo<sup>a,c,\*</sup>

<sup>a</sup> Department of Chemistry, Wayne State University, 1501 Cass Avenue, Detroit, Michigan 48202, United States

<sup>b</sup> International Institute for Translational Chinese Medicine, Guangzhou University of Chinese Medicine, 232 Waihuan Donglu, Guangdong 510006, China

<sup>c</sup> Department of Chemistry, University of Florida, 214 Leigh Hall, Gainesville, Florida 32611, United States

#### Table of contents

|                                                                                |              |
|--------------------------------------------------------------------------------|--------------|
| I. Synthesis and Analysis of GM2 conjugates-----                               | Page S2-S10  |
| II. Raw ELISA Data and Additional Data-----                                    | Page S10-S12 |
| III. NMR and MS Spectra of the Synthetic Intermediates and Final Products----- | Page S13-S46 |

## I. Synthesis and Analysis of GM2 conjugates

**Compound 9.** To a solution of **8** (8.0 g, 19.4 mmol) dissolved in anhydrous MeCN were added DMP (2.88 mL, 23.3 mmol) and CSA (1.13 g, 4.8 mmol). The reaction was kept at rt until TLC showed its completion, and was then quenched with Et<sub>3</sub>N (0.7 mL, 4.8 mmol) and diluted with CH<sub>2</sub>Cl<sub>2</sub> (90 mL). The mixture was washed with brine, dried over Na<sub>2</sub>SO<sub>4</sub>, and concentrated in vacuum. The residue was purified by flash column chromatography (MeOH/CH<sub>2</sub>Cl<sub>2</sub>, 1:10, v/v) to afford **9** as a white solid (6.12 g, 72%). <sup>1</sup>H NMR (600 MHz, CDCl<sub>3</sub>): δ: 5.22 (bs, 1-OH), 5.04 (bs, 1-OH), 4.51 (d, *J* = 8.1 Hz, 1 H, H-1), 4.35 (d, *J* = 7.3 Hz, 1 H, H-1'), 4.16 (bs, 1-OH), 4.09-4.03 (m, 3 H, H-3, H-6, H-6'), 3.94-3.87 (m, 3 H, H-2), 3.86-3.78 (m, 3H), 3.75-3.62 (m, 4H), 3.56-3.34 (m, 5H, 1-OH), 1.46 (s, 6 H); <sup>13</sup>C NMR (150 MHz, CDCl<sub>3</sub>): δ: 102.7, 102.5, 99.4, 75.3, 75.2, 73.4, 72.1, 69.0, 68.4, 68.2, 66.8, 62.5, 61.2, 50.8, 21.4, 18.4; ESI-TOF HR-MS *m/z*: calcd. for C<sub>17</sub>H<sub>29</sub>N<sub>3</sub>O<sub>11</sub> [M + Na]<sup>+</sup> 474.4; found 474.5.

**Compound 10.** A mixture of **9** (6.0 g, 13.4 mmol) and NaH (2.2 g, 93.46 mmol) in anhydrous DMF (30 mL) was stirred at 0 °C for 45 min, and then to it was added benzyl bromide (11.1 mL, 93.46 mmol). The mixture was stirred at 0 °C for another 6 h, when TLC showed the completion of reaction. The reaction was quenched with H<sub>2</sub>O at 0 °C, and the mixture was diluted with EtOAc. The aqueous layer was washed with EtOAc (15 x 5 mL), and the organic phase was combined, dried over Na<sub>2</sub>SO<sub>4</sub>, and concentrated. The residue was purified by flash column chromatography (acetone/hexane 2:10, v/v) to give **10** (9.71 g, 81%) as colorless syrup. <sup>1</sup>H NMR (400 MHz, CDCl<sub>3</sub>): δ 7.56-7.51 (m, 2 H, ArH), 7.44-7.16 (m, 23 H, ArH), 5.19 (d, *J* = 10.8 Hz, 1 H), 4.94 (d, *J* = 11.7 Hz, 1 H), 4.91 (d, *J* = 11.7 Hz, 1 H), 4.82 (d, *J* = 11.7 Hz, 1 H), 4.78 (d, *J* = 11.7 Hz, 1 H), 4.75-4.68 (m, 3 H), 4.55 (d, *J* = 12.7 Hz, 1 H), 4.47-4.41 (m, 2 H, H-1, H-1'), 4.36 (d, *J* = 12.7 Hz, 1 H), 4.10-3.92 (m, 3 H), 3.91-3.81 (m, 3 H), 3.79-3.61 (m, 4 H), 3.56-3.30 (m, 5 H), 2.86 (s, 1 H), 1.52 (s, 3 H), 1.44 (s, 3 H); <sup>13</sup>C NMR (100 MHz, CDCl<sub>3</sub>): δ 139.0, 138.9, 138.7, 138.4, 138.3, 129.1, 128.7, 128.4, 128.3, 128.28, 128.25, 128.22, 128.1, 127.9, 127.8, 127.76, 127.6, 127.5, 127.4, 125.3, 103.7, 102.6, 98.8, 82.9, 81.8, 79.8, 78.9, 77.4, 75.7, 75.3, 75.2, 75.1, 73.0, 71.8, 68.3, 68.1, 66.4, 66.2, 62.5, 51.0, 29.2, 18.8; ESI-TOF HR-MS (positive mode) *m/z*: calcd. for C<sub>52</sub>H<sub>59</sub>N<sub>3</sub>O<sub>11</sub> [M + Na]<sup>+</sup> 925.1; found 925.0.

**Compound 5.** To a solution of **10** (5.0 g, 5.5 mmol) in MeOH was added HCl in MeOH (5%, 0.2 mL). The solution was stirred at rt until TLC showed the completion of reaction. After the reaction was quenched with Et<sub>3</sub>N, the mixture was diluted with CH<sub>2</sub>Cl<sub>2</sub> (80 mL), washed with brine, dried over anhydrous Na<sub>2</sub>SO<sub>4</sub>, and concentrated in vacuum. The residue was purified by flash column chromatography (acetone/CH<sub>2</sub>Cl<sub>2</sub>, 2:10, v/v) to give **5** as a white solid (3.91 g, 83%). <sup>1</sup>H NMR (600 MHz, CDCl<sub>3</sub>): δ 7.42-7.39 (m, 2 H, ArH), 7.37-7.20 (m, 23 H, ArH), 4.98 (d, *J* = 10.3 Hz, 1 H), 4.92 (d, *J* = 11.0 Hz, 1 H), 4.81-4.72 (m, 4 H), 4.68 (ABq, *J* = 11.7, 7.3 Hz, 2 H), 4.54 (d, *J* = 11.7 Hz, 1 H), 4.42 (d, *J* = 8.0 Hz, 1 H, H-1), 4.38 (d, *J* = 11.0 Hz, 1 H), 4.36 (d, *J* = 7.4 Hz, 1 H, H-1'), 4.06-4.00 (m, 1 H), 3.92 (t, *J* = 9.5 Hz, 1 H), 3.90-3.87 (m, 1 H), 3.79 (dd, *J* = 11.0, 4.4 Hz, 1 H), 3.74-3.68 (m, 2 H), 3.65-3.53 (m, 4 H), 3.52-3.37 (m, 4 H), 3.33 (dd, *J* = 9.5, 2.9 Hz, 1 H), 3.17-3.13 (m, 1 H), 2.65 (bs, 1-OH); <sup>13</sup>C NMR (150 MHz, CDCl<sub>3</sub>): δ 138.8, 138.6, 138.5, 138.2, 137.8, 128.5, 128.4, 128.5, 128.4, 128.3, 128.27, 128.2, 128.1, 128.0, 127.9, 127.8, 127.79, 127.77, 127.75, 127.6, 127.56, 103.6, 102.6, 82.7, 82.6, 81., 79.2, 76.7, 75.6, 75.3, 75.1, 75.0, 74.0, 73.2, 72.1, 68.1, 67.2, 62.3, 51.0; ESI-TOF HR-MS *m/z*: calcd. for C<sub>49</sub>H<sub>55</sub>N<sub>3</sub>O<sub>11</sub> [M + Na]<sup>+</sup> 884.3734; found 884.3729.

**Compound 6.** A suspension of D-galactosamine hydrochloride **11** (5 g, 23.25 mmol), Na<sub>2</sub>CO<sub>3</sub> (2.46 g 23.25 mmol), and phthalic anhydride (3.45 g, 23.25 mmol) in H<sub>2</sub>O (50 ml) was stirred at rt for 3 h. The solution was lyophilized to give a pale yellow solid residue, which was suspended in pyridine (200 ml) at 0 °C, and then acetic anhydride (100 ml) was added. The suspension was stirred at rt for 20 h. Acetic anhydride and pyridine were evaporated in vacuum, and the residue was co-evaporated with toluene (10 ml) twice and then subjected to silica gel chromatography (EtOAc/toluene 1:9, v/v) to give **12** as a white solid (8.18 g, 74%). To the stirred solution of **12** (5.0 g, 10.47 mmol) and *p*-toluenethiol (1.95 g, 15.71 mmol) in anhydrous CH<sub>2</sub>Cl<sub>2</sub> (30 mL) was added BF<sub>3</sub>·Et<sub>2</sub>O (1.6 mL, 12.56 mmol) dropwise at 0 °C. When TLC showed the completion of reaction, the mixture was washed with saturated aq. NaHCO<sub>3</sub> solution and brine, dried over anhydrous Na<sub>2</sub>SO<sub>4</sub>, and concentrated. The residue was purified by flash column chromatography (EtOAc/hexane 1:4, v/v) to give **13** (spectroscopic data were identical to that of the reported)<sup>58</sup> as a white solid (4.96 g, 88%). To a stirred solution of **13** (4.9 g, 9.05 mmol) in MeOH (25 mL) was added CH<sub>3</sub>ONa in CH<sub>3</sub>OH (0.4 M) until pH reached 9.5. The mixture was stirred for another 4 h. When TLC showed the completion of reaction, it was neutralized with Amberlyst (H<sup>+</sup>) resin to pH

6-7, concentrated in vacuum, and purified by flash column chromatography (MeOH/CH<sub>2</sub>Cl<sub>2</sub>, 1:8, v/v) to afford a solid compound (3.43 g, 91%) that was directly applied to the next reaction. The solid product (3.0 g, 7.2 mmol) was dissolved in anhydrous DMF, and to the solution was added NaH (867 mg, 36.14 mmol) at 0 °C. After 45 min of stirring, benzyl bromide (4.3 mL, 36.14 mmol) was added at 0 °C, and the mixture was stirred for another 6 h. When TLC showed the completion of reaction, it was quenched with H<sub>2</sub>O, and the mixture was diluted with EtOAc. The aqueous layer was extracted with EtOAc (5 x 20 mL), and the combined organic layer was dried over Na<sub>2</sub>SO<sub>4</sub> and concentrated. The residue was purified by flash column chromatography (acetone/hexane 1:11, v/v) to yield **5** as a white solid (4.38 g, 83%). <sup>1</sup>H NMR (600 MHz, CDCl<sub>3</sub>): δ 7.89-7.84 (m, 2 H, ArH), 7.75-7.64 (m, 3 H, ArH), 7.39-7.27 (m, 12 H, ArH), 7.08-6.94 (m, 7 H, ArH), 5.53 (d, *J* = 10.3 Hz, 1 H, H-1), 4.99 (d, *J* = 11.7 Hz, 1 H), 4.84 (t, *J* = 10.3 Hz, 1 H, H-2), 4.63 (d, *J* = 10.3 Hz, 1 H), 4.60 (d, *J* = 11.0 Hz, 1 H), 4.47 (ABq, *J* = 11.7 Hz, 2 H), 4.36 (d, *J* = 10.3 Hz, 1 H, H-3), 4.31 (d, *J* = 11.7 Hz, 1 H), 4.10 (s, 1H, H-4), 3.83-3.79 (m, 1 H, H-5), 3.73-3.69 (m, 2 H, H-6, H-6'), 2.26 (s, 3 H); <sup>13</sup>C NMR (150 MHz, CDCl<sub>3</sub>): δ 168.4, 167.5, 138.6, 138., 137.6, 134.0, 133.8, 132.6, 131.8, 129.5, 129.2, 128.4, 128.2, 128.1, 127.9, 127.8, 127.7, 127.6, 127.5, 123.5, 123.1, 84.5, 77.6, 77.5, 74.5, 73.5, 72.2, 71.4, 68.9, 51.8, 21.1; ESI-TOF HR-MS *m/z*: calcd. for C<sub>42</sub>H<sub>39</sub>NO<sub>6</sub>S [M + Na]<sup>+</sup> 708.2396; found 708.2390.

**Compound 14.** A mixture of **5** (1.5 g, 1.74 mmol) and **7a** (2.19 g, 3.48 mmol) was azeotroped twice with anhydrous toluene (5 mL) and dried under high vacuum for 5 h. It was then dissolved in dry CH<sub>3</sub>CN/CH<sub>2</sub>Cl<sub>2</sub> (8:2, 20 mL), mixed with freshly activated 4Å molecular sieves (3 g), and stirred under an Ar atmosphere at rt for 1 h. To the mixture was added NIS (1.17 g, 5.22 mmol). After cooling to -30 °C, TfOH (15.39 μL, 0.174 mmol) was added, and the mixture was stirred at -20 °C for 2 h. When TLC showed the completion of reaction, saturated aq. NaHCO<sub>3</sub> and CH<sub>2</sub>Cl<sub>2</sub> were added, and the mixture was filtered through a Celite pad to remove molecular sieves. After extraction of the aqueous layer with CH<sub>2</sub>Cl<sub>2</sub> (3 x 15), the combined organic phase was dried over Na<sub>2</sub>SO<sub>4</sub> and concentrated in vacuum. The residue was purified by flash column chromatography (acetone/hexane 5:10, v/v) to give **14** (1.78 g, 74%) as syrup and a small amount of the β isomer (8%). <sup>1</sup>H NMR (600 MHz, CDCl<sub>3</sub>): δ 7.43-7.40 (m, 2 H, ArH), 7.36-7.22 (m, 22 H, ArH), 7.19-7.15 (m, 1 H, ArH), 5.57-5.54 (m, 1 H, H-8c), 5.35 (s, 1 H, -Sialic NH), 5.15 (dd, *J* = 9.5, 1.5 Hz, 1 H, H-7c), 4.93 (d, *J* = 11.0 Hz, 1 H), 4.90 (d, *J* = 11.0 Hz, 1 H), 4.79 (d, *J* = 11.0 Hz, 1 H), 4.75 (d,

$J = 11.0$  Hz, 1 H), 4.73 (d,  $J = 11.0$  Hz, 1 H), 4.72 (d,  $J = 11.0$  Hz, 1 H), 4.68 (d,  $J = 11.7$  Hz, 1 H), 4.55 (d,  $J = 11.7$  Hz, 1 H), 4.49 (d,  $J = 12.5$  Hz, 1 H), 4.48 (d,  $J = 7.3$  Hz, 1 H, H-1'), 4.43 (d,  $J = 7.3$  Hz, 1 H, H-1), 4.42 (d,  $J = 11.7$  Hz, 1 H), 4.32 (dd,  $J = 12.5, 3.6$  Hz, 1 H), 4.26 (d,  $J = 14.1$  Hz, 1 H), 4.22-4.20 (m, 1 H, H-4c), 4.14 (d,  $J = 14.1$  Hz, 1 H), 4.01 (s, 2 H), 4.05-4.00 (m, 4 H), 3.99-3.88 (m, 3 H), 3.82-3.77 (m, 3 H), 3.76 (s, 3 H), 3.74-3.68 (m, 3 H), 3.62-3.54 (m, 3 H), 3.52-3.36 (m, 5 H), 3.28 (t,  $J = 6.6$  Hz, 1 H), 2.91 (t,  $J = 10.3$  Hz, 1 H), 2.75 (dd,  $J = 12.5, 3.6$  Hz, 1 H, H-3eq-c), 2.03 (t,  $J = 12.5$  Hz, 1 H, H-3ax-c), 1.77 (bs, 1 OH);  $^{13}\text{C}$  NMR (150 MHz,  $\text{CDCl}_3$ ):  $\delta$  168.2, 168.0, 167.0, 166.2, 159.1, 139.3, 138.52, 138.50, 138.2, 137.9, 129.0, 128.5, 128.4, 128.3, 128.2, 128.1, 128.05, 128.0, 127.9, 127.8, 127.7, 127.6, 127.5, 127.2, 125.3, 103.6, 102.2, 100.2, 82.6, 81.8, 80.9, 79.2, 76.7, 76.0, 75.2, 75.0, 74.9, 73.5, 73.2, 72.2, 72.1, 70.4, 68.4, 68.2, 65.6, 63.2, 62.9, 57.4, 53.4, 51.0, 40.9, 40.4, 40.3, 36.1; ESI-TOF HR-MS  $m/z$ : calcd. for  $\text{C}_{66}\text{H}_{73}\text{Cl}_3\text{N}_4\text{O}_{22}$   $[\text{M} + \text{Na}]^+$  1401.3680; found 1401.3647.

**Compound 15.** A mixture of **14** (0.50 g, 0.362 mmol) and **6** (0.50 g, 0.724 mmol) was azeotroped twice with anhydrous toluene (5 mL) and then dried under high vacuum for 5 h. The mixture was dissolved in  $\text{CH}_2\text{Cl}_2$  (10 mL), combined with freshly activated 4Å molecular sieves (3 g), and stirred under an Ar atmosphere at rt for 1 h. To the mixture was added NIS (162 mg, 0.724 mmol). After cooling to  $-20$  °C, TfOH (16  $\mu\text{L}$ , 0.181 mmol) was added, and the reaction was stirred at  $-10$  °C for 2 h. After TLC showed the completion of reaction,  $\text{CH}_2\text{Cl}_2$  and saturated aq.  $\text{NaHCO}_3$  solution were added. The resulting mixture was filtered through a Celite pad to remove molecular sieves. The water layer was extracted with  $\text{CH}_2\text{Cl}_2$  (3 x 10), and the combined organic phase was dried over  $\text{Na}_2\text{SO}_4$  and concentrated in vacuum. The residue was purified by silica gel column chromatography (acetone/hexane 1:11, v/v) to afford an anomeric mixture **15** ( $\alpha:\beta$  1:2) (455 mg, 65%) as syrup. The  $\beta$  isomer:  $^1\text{H}$  NMR (600 MHz,  $\text{CDCl}_3$ ):  $\delta$  7.79-7.76 (m, 1 H, ArH), 7.54-7.50 (m, 2 H, ArH), 7.49-7.46 (m, 2 H, ArH), 7.44-7.14 (m, 32 H, ArH), 7.07-7.04 (m, 2 H, ArH), 7.01-6.96 (m, 2 H, ArH), 6.95-6.92 (m, 2 H, ArH), 6.76-6.71 (m, 1 H, ArH), 5.39-5.36 (m, 1 H, H-8c), 5.23 (d,  $J = 6.9$  Hz, 1 H, H-1'''), 5.35 (s, 1 H, -Sialic NH), 5.00-4.97 (m, 1H, H-7c,  $J = 11.7$  Hz, 1 H), 4.91-4.87 (m, 2 H), 4.72-4.69 (m, 2 H), 4.67-4.63 (m, 3 H), 4.59 (d,  $J = 11.7$  Hz, 1 H), 4.54 (d,  $J = 12.5$  Hz, 1 H), 4.49 (d,  $J = 12.5$  Hz, 1 H), 4.45 (d,  $J = 12.5$  Hz, 1 H), 4.43 (d,  $J = 12.5$  Hz, 1 H), 4.39 (d,  $J = 6.9$  Hz, 1 H, H-1), 4.36 (d,  $J = 12.5$  Hz, 1 H), 4.34 (d,  $J = 12.5$  Hz, 1 H), 4.29 (d,  $J = 12.5$  Hz, 1 H), 4.18 (d,  $J = 7.3$  Hz, 1 H, H-1'), 4.16-4.13 (m, 4 H), 4.09 (d,  $J = 12.5$  Hz, 1 H), 4.06

(d,  $J = 12.5$  Hz, 1 H), 4.02-3.96 (m, 4 H), 3.92 (d,  $J = 10.1$  Hz, 1 H), 3.87 (d,  $J = 13.6$  Hz, 1 H), 3.83 (d,  $J = 10.1$  Hz, 1 H), 3.80-3.72 (m, 3 H), 3.71-3.67 (m, 2 H), 3.66-3.55 (m, 5 H), 3.53 (s, 3 H), 3.50-3.44 (m, 4 H), 3.41-3.36 (m, 1 H), 3.35-3.30 (m, 1 H), 3.29-3.24 (m, 1 H), 3.07-2.96 (m, 3 H), 2.48 (dd,  $J = 12.5, 3.0$  Hz, 1 H, H-3eq-c), 1.90 (t,  $J = 12.5$  Hz, 1 H, H-3ax-c);  $^{13}\text{C}$  NMR (150 MHz,  $\text{CDCl}_3$ ):  $\delta$  168.7, 168.1, 167.8, 167.7, 166.9, 166.0, 159.2, 138.9, 138.7, 138.5, 138.4, 138.3, 138.01, 137.97, 137.88, 133.4, 132.6, 131.8, 129.9, 129.0, 128.5, 128.3, 127.7, 127.4, 126.9, 123.2, 122.7, 103.7, 101.4, 100.5, 99.7, 82.3, 81.8, 80.3, 79.9, 76.9, 75.6, 75.3, 74.5, 73.5, 73.1, 72.9, 72.4, 72.0, 70.5, 68.9, 68.5, 68.2, 64.6, 62.8, 56.8, 53.3, 53.1, 50.9, 40.7, 40.4, 40.3, 35.4; ESI-TOF HR-MS  $m/z$ : calcd. for  $\text{C}_{101}\text{H}_{104}\text{N}_5\text{O}_{28}$   $[\text{M} + \text{Na}]^+$  1962.5831; found 1962.5844.

**Compound 16.** A mixture of **5** (1.5 g, 1.74 mmol) and **7b** (2.03 g, 3.48 mmol) was azeotroped twice with anhydrous toluene (5 mL) and dried under high vacuum for 5 h. The mixture was then dissolved in  $\text{CH}_3\text{CN}/\text{CH}_2\text{Cl}_2$  (4:1, 30 mL), combined with freshly activated 4Å molecular sieves (3 g), and stirred under an Ar atmosphere at rt for 1 h. To the mixture was added NIS (783 mg, 3.48 mmol). After cooling to  $-20$  °C, TfOH (15  $\mu\text{L}$ , 0.174 mmol) was added, and the mixture was stirred at  $-15$  °C for 2 h. When TLC showed the completion of reaction,  $\text{CH}_2\text{Cl}_2$  and saturated aq.  $\text{NaHCO}_3$  solution were added, and the resulting mixture was filtered through a Celite pad to remove molecular sieves. The aqueous layer was extracted with  $\text{CH}_2\text{Cl}_2$  (3 x 10). The combined organic phase was dried over  $\text{Na}_2\text{SO}_4$  and concentrated in vacuum, and the residue was purified by flash column chromatography (EtOAc/toluene 2:10, v/v) to give **16** (1.39 g, 60%) as syrup, as well as a very small amount of its  $\beta$  isomer (2.5%). Compound **16**:  $^1\text{H}$  NMR (600 MHz,  $\text{CDCl}_3$ ):  $\delta$  7.43-7.40 (m, 1 H, ArH), 7.38-7.20 (m, 24 H, ArH), 5.38-5.33 (m, 2 H, -Sialic NH, H-8c), 5.21 (dd,  $J = 9.5, 2.2$  Hz, 1 H, H-7c), 4.97 (d,  $J = 11.0$  Hz, 1 H), 4.89 (d,  $J = 11.0$  Hz, 1 H), 4.87-4.83 (m, 1 H, H-4c), 4.78 (d,  $J = 11.0$  Hz, 2 H), 4.72 (d,  $J = 11.0$  Hz, 2 H), 4.64 (d,  $J = 11.7$  Hz, 1 H), 4.49 (d,  $J = 11.7$  Hz, 1 H), 4.45 (d,  $J = 8.1$  Hz, 1 H, H-1'), 4.41 (d,  $J = 7.3$  Hz, 1 H, H-1), 4.38 (d,  $J = 12.4$  Hz, 1 H), 4.36-4.34 (m, 1 H), 4.11 (d,  $J = 10.4$  Hz, 1 H), 4.09-4.00 (m, 3 H), 3.97 (t,  $J = 8.8$  Hz, 1 H, H-3), 3.77 (s, 3 H), 3.79-3.66 (m, 5 H), 3.63-3.55 (m, 3 H), 3.51-3.49 (m, 1 H), 3.45-3.36 (m, 3 H), 3.29-3.25 (m, 1 H), 2.45 (dd,  $J = 12.5, 4.4$  Hz, 1 H, H-3eq-c), 2.11, 2.10, 2.03, 1.94, 1.88 (5s, 15 H), 1.89 (t, 1 H, H-3ax-c);  $^{13}\text{C}$  NMR (150 MHz,  $\text{CDCl}_3$ ):  $\delta$  170.9, 170.8, 170.2, 170.1, 170.0, 167.9, 139.1, 138.7, 138.6, 138.3, 138.2, 128.4, 128.34, 128.28, 128.27, 128.21, 128.11, 128.1, 127.9, 127.8, 127.7, 127.6, 127.52, 127.48, 127.4, 103.6, 102.5, 98.9, 82.5, 81.8, 81.2, 79.3,

76.7, 75.2, 75.1, 75.0, 74.9, 73.1, 72.1, 71.6, 69.11, 69.1, 68.4, 68.1, 67.5, 64.9, 62.4, 61.8, 52.9, 50.9, 49.4, 36.4, 23.2, 21.1, 20.8, 20.7; ESI-TOF HR-MS  $m/z$ : calcd. for  $C_{69}H_{82}N_4O_{23}$   $[M + H]^+$  1335.5440; found 1335.5448.

**Compound 17.** A mixture of **16** (0.50 g, 0.374 mmol) and **6** (0.77 g, 1.12 mmol) was azeotroped twice with anhydrous toluene (5 mL) and then dried under high vacuum for 5 h. The mixture was dissolved in  $CH_2Cl_2$  (20 mL), combined with freshly activated 4Å molecular sieves (3 g), and stirred under an Ar atmosphere at rt for 1 h. To the mixture was added NIS (253 mg, 1.12 mmol). After cooling to -40 °C, TfOH (3.31  $\mu$ L, 0.04 mmol) was added, and the reaction was stirred at -30 °C for 2 h. When TLC showed the completion of reaction,  $CH_2Cl_2$  and saturated aq.  $NaHCO_3$  solution were added, and the mixture was filtered through a Celite pad to remove molecular sieves. After the aqueous layer was extracted with  $CH_2Cl_2$  (3 x 10), the combined organic phase was dried over  $Na_2SO_4$  and condensed in vacuum. The residue was purified by silica gel column chromatography (acetone/hexane 1:5, v/v) to give **17** (440 mg, 62%) as syrup, as well as a small amount of its  $\alpha$  isomer (10%). Compound **17**:  $^1H$  NMR (600 MHz,  $CDCl_3$ ):  $\delta$  7.77-7.75 (m, 1 H, ArH), 7.54-7.45 (m, 4 H, ArH), 7.41-7.30 (m, 14 H, ArH), 7.30-7.15 (m, 18 H, ArH), 7.08-7.05 (m, 2 H, ArH), 7.03-6.98 (m, 2 H), 6.96-6.93 (m, 2 H), 6.89-6.85 (m, 1 H), 5.25-5.22 (m, 1 H, H-8c,  $J = 8.1$  Hz, 1 H, H-1'''), 5.20-5.14 (m, 2 H, -Sialic NH, H-7c), 5.21 (dd,  $J = 9.5, 2.2$  Hz, 1 H, H-7c), 4.95 (d,  $J = 11.0$  Hz, 2 H), 4.88 (d,  $J = 11.0$  Hz, 1 H), 4.85-4.80 (m, 1 H), 4.78 (d,  $J = 11.0$  Hz, 1 H), 4.69 (d,  $J = 12.5$  Hz, 1 H), 4.67 (d,  $J = 12.5$  Hz, 1 H), 4.63 (d,  $J = 12.5$  Hz, 2 H), 4.57 (d,  $J = 11.7$  Hz, 1 H), 4.56 (d,  $J = 11.0$  Hz, 1 H), 4.50 (d,  $J = 11.7$  Hz, 1 H), 4.49 (d,  $J = 12.5$  Hz, 1 H), 4.42 (d,  $J = 12.5$  Hz, 1 H), 4.37 (d,  $J = 12.5$  Hz, 1 H), 4.36 (d,  $J = 7.3$  Hz, 1 H, H-1), 4.29 (d,  $J = 11.7$  Hz, 1 H), 4.28 (d,  $J = 12.5$  Hz, 1 H), 4.24 (d,  $J = 7.3$  Hz, 1 H, H-1'), 4.20 (dd,  $J = 12.5, 2.9$  Hz, 1 H), 4.13-4.10 (m, 2 H), 4.02-3.92 (m, 4 H), 3.85-3.80 (m, 2 H), 3.78-3.74 (m, 2 H), 3.69-3.55 (m, 5 H), 3.54 (s, 3 H), 3.53-3.31 (m, 7 H), 3.15-3.09 (m, 2 H), 3.03-2.99 (m, 1 H), 2.43 (dd,  $J = 12.5, 4.4$  Hz, 1 H, H-3eq-c), 2.01, 1.99, 1.98, 1.90, 1.84 (5s, 15 H), 1.76 (t,  $J = 12.5$  Hz, 1 H, H-3ax-c);  $^{13}C$  NMR (150 MHz,  $CDCl_3$ ):  $\delta$  170.9, 170.5, 170.2, 170.1, 169.8, 168.74, 167.7, 167.6, 138.9, 138.8, 138.5, 138.4, 138.4, 138.2, 138.0, 128.5, 128.3, 128.2, 128.1, 128.0, 127.5, 127.2, 127.1, 123.1, 123.0, 122.7, 103.6, 101.7, 99.6, 99.2, 82.1, 81.7, 81.1, 80.1, 79.2, 76.2, 75.6, 75.1, 74.6, 73.4, 73.0, 72.6, 72.2, 71.7, 69.3, 68.1, 67.5, 62.8, 62.1, 53.3, 52.7, 51.0, 49.5, 37.5, 29.7,

23.2, 20.9, 20.7; ESI-TOF HR-MS  $m/z$ : calcd. for  $C_{104}H_{113}N_5O_{29}$   $[M+Na]^+$  1918.7419; found 1918.7372.

**Compound 1.** To a stirred solution of **17** (50 mg, 0.026 mmol) in MeOH (10 mL) was added LiOH (25 mg in 10 mL of  $H_2O$ ) in portions. After being refluxed for 2 h, hydrazine monohydrate (2.5 mL) was added, and the mixture was heated at reflux for 2 d. The mixture was concentrated under vacuum, and the residue was dissolved in pyridine (5 ml). To the stirred solution was added acetic anhydride (5 ml) at rt. After stirring for 12 h, the solution was concentrated and co-evaporated with toluene 3 times to give a solid residue, which was dissolved in  $CH_3OH$  (12 mL). To the solution was added NaOMe (40 mg), and the reaction was stirred at rt for 12 h and then neutralized with 0.1 N HCl at 0 °C. To the solution was added 10% Pd-C (50.0 mg). The mixture was shaken under an  $H_2$  atmosphere at 50 psi for 24 h. The catalyst was removed by filtration through a Celite pad, and the pad was washed with MeOH: $H_2O$  (1:1). The combined filtrate was concentrated under vacuum and the residue was dissolved in 2 ml of  $H_2O$  and lyophilized to give the crude product that was finally purified on a Sephadex G-25 column with water as the eluent, followed by lyophilization to afford **1** (14.3 mg, 62%, over four steps) as a white solid.  $^1H$  NMR (600 MHz,  $D_2O$ ):  $\delta$  4.49 – 4.33 (m, 2H), 4.27 (d,  $J$  = 7.8 Hz, 1H), 3.98 (m, 1H), 3.94 – 3.62 (m, 12H), 3.62 – 3.34 (m, 12H), 3.26 (m, 2H), 3.13 (m, 2H), 2.55 (dd,  $J$  = 12.3, 4.2 Hz, 1H, H-3<sub>eq</sub>), 1.97 – 1.85 (m, 6H), 1.58 (t,  $J$  = 12.2 Hz, 1H, H-3<sub>ax</sub>);  $^{13}C$  NMR (150 MHz,  $D_2O$ ):  $\delta$  174.9, 174.9, 173.5, 103.2, 102.8, 101.8, 100.4, 79.6, 77.1, 74.8, 74.6, 74.5, 73.5, 72.6, 72.4, 72.3, 71.6, 71.1, 70.8, 68.4, 68.0, 65.7, 64.9, 62.6, 61.2, 60.1, 52.7, 51.8, 40.2, 39.4, 22.4, 22.1; ESI-TOF HR-MS  $m/z$ : calcd. for  $C_{33}H_{57}N_3NaO_{24}$   $[M + Na]^+$  902.3230; found 902.3221.

**Compound 20.** To a stirred solution of **19** (12 mg, 5  $\mu$ mol) and **1** (7 mg, 8  $\mu$ mol) in anhydrous DMF (3 mL) was added *N*-methylmorpholine (6  $\mu$ L, 54  $\mu$ mol) at rt. After being stirred for 2 d, the solution was concentrated in vacuo. The residue was purified with a preparative TLC plate (using MeOH/ $CH_2Cl_2$ / $H_2O$ /DMF 3:3:1:1, v/v, as the eluent) to give **20** (7.0 mg, 45%) as a white powder.  $^1H$  NMR (600 MHz,  $CDCl_3$ : $CD_3OD$ : $D_2O$  = 5:3:1):  $\delta$  5.20 – 5.14 (m, 1H), 5.13 – 5.01 (m, 2H), 4.62 (m, 1H), 4.40 – 4.20 (m, 5H), 4.29 (m, 3H), 4.08 (m, 2H), 4.02 (m, 4H), 3.97 – 3.20 (m, 39H), 2.77 – 2.11 (m, 14H), 1.97 (2s, 6H), 1.80 – 1.41 (m, 13H), 1.40 – 1.00 (m, 98H), 0.96 – 0.78 (m, 18H);  $^{31}P$  NMR (400 MHz,  $CDCl_3$ : $CD_3OD$ : $D_2O$  = 5:3:1):  $\delta$  -2.70; ESI-TOF HR-MS  $m/z$ :



calcd. for  $C_{169}H_{264}N_6Na_4O_{48}P$   $[M + 4Na - H]^{3+}$  1089.5910; found 1089.7224;  $m/z$ : calcd. for  $C_{169}H_{264}N_6Na_3O_{48}P$   $[M + 3Na - H]^{2+}$  1622.8916; found 1623.0938.

**MPLA conjugate 2.** A mixture of **20** (7.0 mg, 2.2  $\mu$ mol) and 10% Pd-C (20.0 mg) in  $CH_2Cl_2$ , MeOH, and  $H_2O$  (3:3:1, 5 mL) was stirred under an  $H_2$  atmosphere at rt for 12 h. The catalyst was removed by filtration through a Celite pad, and the Celite pad was washed with a mixture of  $CH_2Cl_2$ , MeOH, and  $H_2O$  (3:3:1). The combined filtrates were concentrated in vacuum to give **2** (5.0 mg, 85%) as a white solid.  $^1H$  NMR (600 MHz,  $CDCl_3:CD_3OD:D_2O = 3:3:1$ ):  $\delta$  7.36 – 7.10 (m, 30H), 5.49 – 5.44 (m, 1H), 5.20 – 5.14 (m, 1H), 5.13 – 5.01 (m, 2H), 4.82 (m, 4H), 4.56 – 4.37 (m, 7H), 4.29 (m, 3H), 4.16 (m, 2H), 4.02 (m, 2H), 3.97 – 3.78 (m, 10H), 3.79 – 3.66 (m, 6H), 3.67 – 3.47 (m, 13H), 3.47 – 3.35 (m, 4H), 3.32 (m, 6H), 2.76 – 2.71 (m, 1H), 2.58 – 2.36 (m, 6H), 2.35 – 2.20 (m, 4H), 2.13 (m, 3H), 1.97 (2s, 6H), 1.73 – 1.37 (m, 13H), 1.37 – 0.99 (m, 98H), 0.96 – 0.66 (m, 18H);  $^{31}P$  NMR (400 MHz,  $CDCl_3:CD_3OD:D_2O = 3:3:1$ ):  $\delta$  -2.44; ESI-TOF HR-MS  $m/z$ : calcd. for  $C_{127}H_{229}N_6NaO_{48}P$   $[M + Na]^+$  2660.5298; found 2660.5304.

**Protein conjugates 3 and 4:** After a mixture of **1** (3 mg) and DSG (15 eq.) in DMF and 0.1 M PBS buffer (4:1, 1 mL) was stirred at rt for 6 h, it was concentrated under reduced pressure and the residue was washed with EtOAc five times to afford the activated ester **18** [MALDI-TOF MS (positive mode)  $m/z$ : calcd. for  $C_{42}H_{66}N_4NaO_{29}$   $[M + Na]^+$  1113.37; found 1113.37], which was directly applied to the conjugation reaction with KLH and HSA. Thus, a solution of **18** and KLH or HSA (5 mg) in 0.4 mL of 0.1 M PBS buffer was gently stirred at rt for 2 d. The mixture was applied to a Biogel A0.5 column with 0.1 M PBS buffer as the eluent. Fractions containing the protein glycoconjugate, characterized by the bicinchoninic acid assay for protein, were combined and dialyzed against distilled water for 2 d. The solution was lyophilized to afford the desirable glycoconjugates **3** and **4** as white fluffy solids.

**Analysis of the carbohydrate loadings of conjugates 3 and 4:** The carbohydrate loadings of **3** and **4** were examined by the Svennerholm method.<sup>65</sup> The solution of an accurately weighted conjugate sample (0.3-0.6 mg) in distilled water (1 mL) and the resorcinol reagent (2.0 mL) was heated in a boiling water bath for 30 min and then cooled to rt. To the mixture was added the extraction solution (1-butanol acetate and 1-butanol, 85/15, v/v, 3 mL). The mixture was shaken vigorously and then allowed to stand for 10 min. The organic layer was transferred into a 1.0-cm cuvette, and

its light absorbance at the wavelength of 580 nm was determined by an UV-Vis spectrometer, using samples obtained from free proteins KLH and HSA as blank controls, respectively. The sialic acid content of each glycoconjugate was determined based on the calibration curve created with standard sialic acid samples analyzed under the same conditions and employed to calculate the carbohydrate loading of a glycoconjugate according to the following equation:

$$\text{GM2 loading (\%)} = \frac{\text{sialic acid content (mg) in the sample}}{\text{weight of glycoconjugate sample (mg)}} \times \frac{\text{molecular weight of GM2}}{\text{molecular weight of sialic acid}} \times 100\%$$

The carbohydrate loading of the HSA conjugate **4** was further confirmed with MS analysis.

## II. Raw ELISA Data and Additional Data

**Table S1.** Total antibody titers of pooled antisera of conjugates **2** and **3** (6 µg of GM2/dose)

| Conjugate | <b>1</b> |      |   | <b>2</b> |      |   |
|-----------|----------|------|---|----------|------|---|
|           | Mean     | SD   | N | Mean     | SD   | N |
| d21       | 31561    | 5948 | 3 | 6616     | 1385 | 3 |
| d28       | 20411    | 2683 | 3 | 19358    | 2394 | 3 |
| d35       | 39633    | 5336 | 3 | 62457    | 5701 | 3 |

**Table S2.** Titers of various isotypes of antibodies in the individual mouse antiserum of conjugate **2** (6 µg of GM2/dose)

| Mouse | 1     | 2     | 3     | 4     | 5     | 6     | Mean  |
|-------|-------|-------|-------|-------|-------|-------|-------|
| kappa | 50011 | 43058 | 50579 | 69730 | 53959 | 39566 | 51150 |
| IgG1  | 0     | 0     | 8     | 0     | 12559 | 65    | 2105  |
| IgG2b | 170   | 21550 | 1244  | 16195 | 20396 | 2136  | 10282 |
| IgG2c | 0     | 0     | 0     | 0     | 0     | 0     | 0     |
| IgG3  | 50422 | 7179  | 72709 | 94358 | 85926 | 50180 | 60129 |
| IgM   | 52190 | 6479  | 71014 | 89117 | 17128 | 32790 | 44786 |

**Table S3.** Titers of various isotypes of antibodies in the individual mouse antiserum of conjugate 3 (6  $\mu$ g of GM2/dose)

| Mouse | 1     | 2     | 3     | 4     | 5     | 6      | Mean  |
|-------|-------|-------|-------|-------|-------|--------|-------|
| kappa | 41509 | 55763 | 38234 | 41382 | 49697 | 120778 | 57894 |
| IgG1  | 58350 | 46680 | 35502 | 58695 | 76481 | 80128  | 59306 |
| IgG2b | 233   | 28900 | 954   | 2957  | 7     | 121268 | 25720 |
| IgG2c | 46    | 33    | 0     | 0     | 0     | 31614  | 5282  |
| IgG3  | 11    | 0     | 1070  | 854   | 2     | 57     | 332   |
| IgM   | 12826 | 7864  | 14221 | 1113  | 9215  | 13     | 7542  |

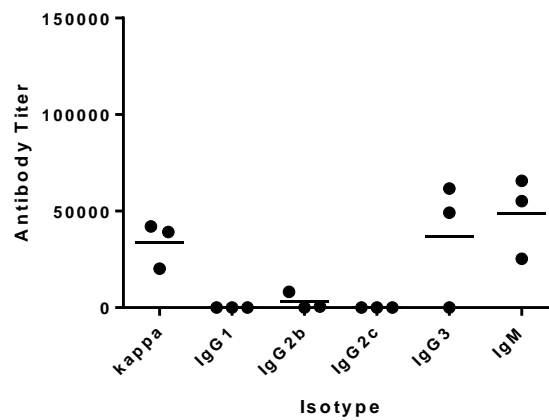

**Figure S1.** Titers of various isotypes of antibodies in the antiserum of individual mouse immunized with conjugate 2 containing 1  $\mu$ g of GM2/injection. Each dot represents one mouse and the horizontal bar represents the average antibody titer of each group of mice.

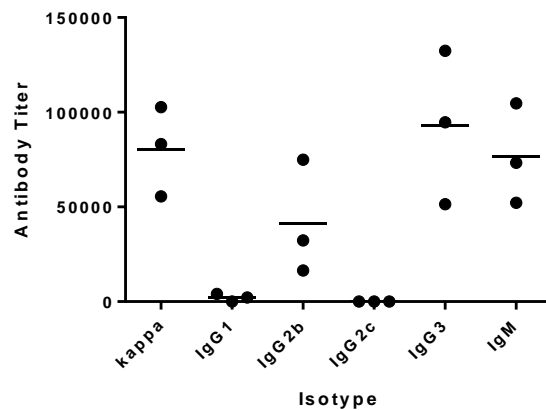

**Figure S2.** Titers of various isotypes of antibodies in the antiserum of individual mouse immunized with conjugate 2 containing 15  $\mu$ g of GM2/injection. Each dot represents one mouse and the horizontal bar represents the average antibody titer of each group of mice.

**Table S4.** Titers of various isotypes of antibodies in the individual mouse antiserum of conjugate 2 (1 µg of GM2/dose)

| Mouse | 1     | 2     | 3     | Mean  |
|-------|-------|-------|-------|-------|
| kappa | 39172 | 20141 | 42112 | 33808 |
| IgG1  | 0     | 1     | 0     | 0     |
| IgG2b | 48    | 8128  | 545   | 2907  |
| IgG2c | 0     | 0     | 0     | 0     |
| IgG3  | 61700 | 3     | 49145 | 36949 |
| IgM   | 25316 | 55125 | 65698 | 48713 |

**Table S5.** Titers of various isotypes of antibodies in the individual mouse antiserum of conjugate 2 (15 µg of GM2/dose)

| Mouse | 1     | 2     | 3      | Mean  |
|-------|-------|-------|--------|-------|
| kappa | 55596 | 83204 | 102661 | 80487 |
| IgG1  | 5     | 2245  | 4010   | 2087  |
| IgG2b | 16380 | 74995 | 32310  | 41228 |
| IgG2c | 0     | 0     | 0      | 0     |
| IgG3  | 51394 | 94627 | 132495 | 92839 |
| IgM   | 73335 | 52226 | 104673 | 76745 |

### III. NMR and MS Spectra of the Synthetic Intermediates and Final Products

Varian 500 NMR spectrometer

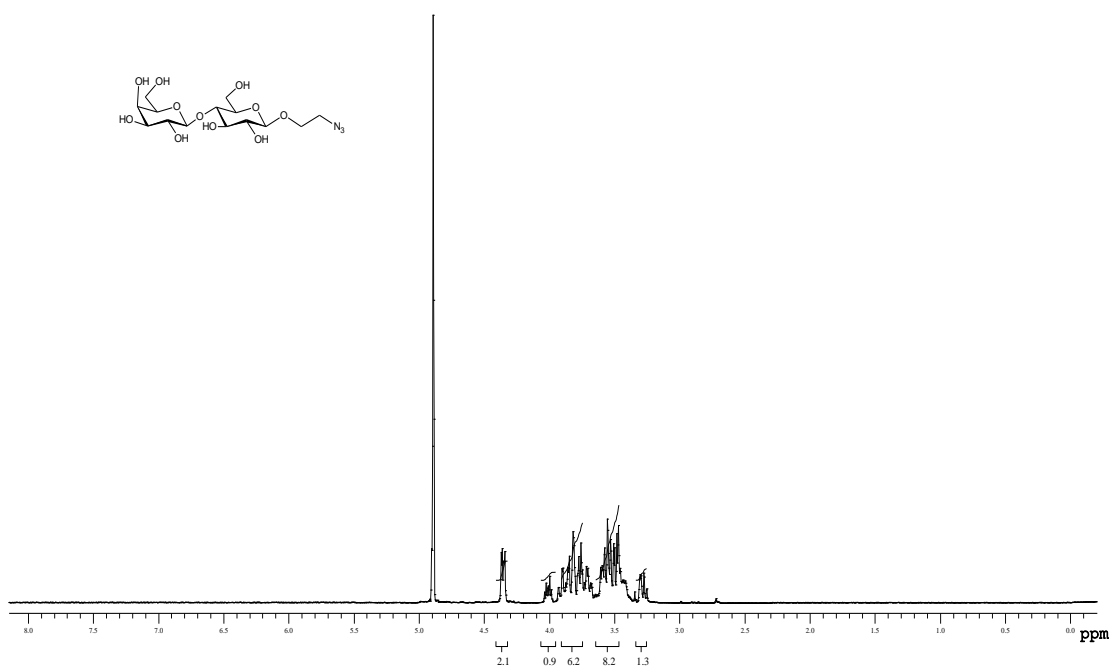

Figure S3. <sup>1</sup>H NMR spectrum of compound 8 (CD<sub>3</sub>OD, 500 MHz)

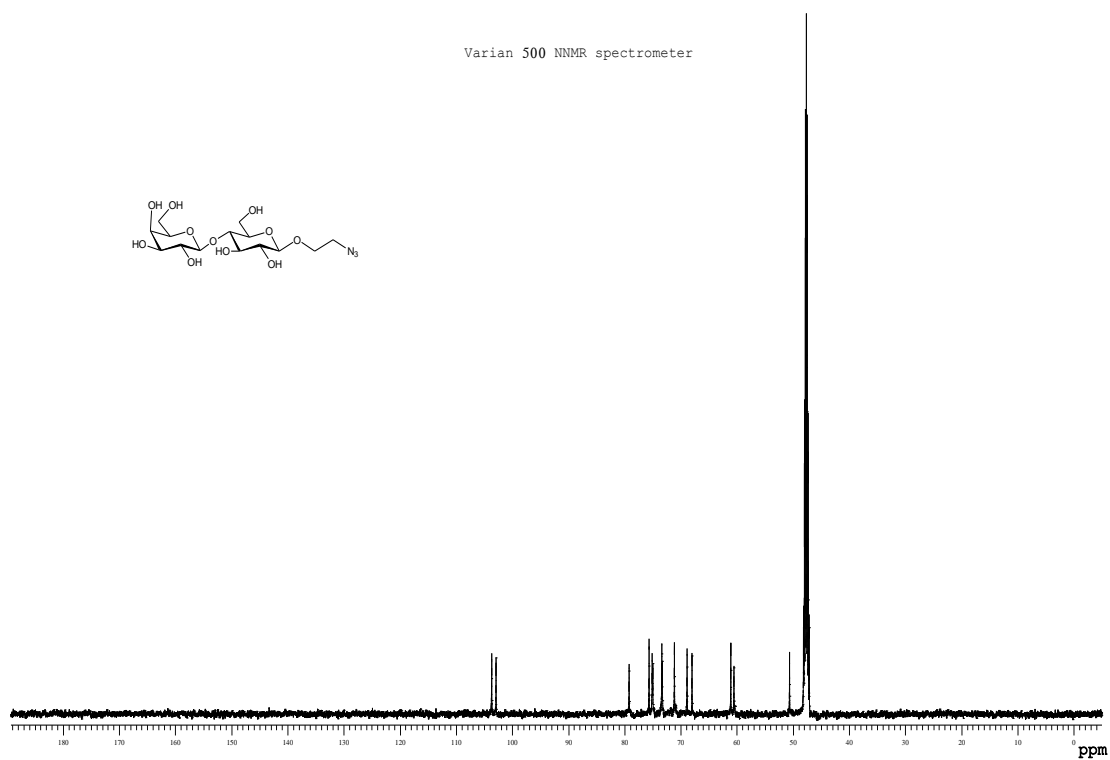

Figure S4. <sup>13</sup>C NMR spectrum of compound 8 (CD<sub>3</sub>OD, 125 MHz)

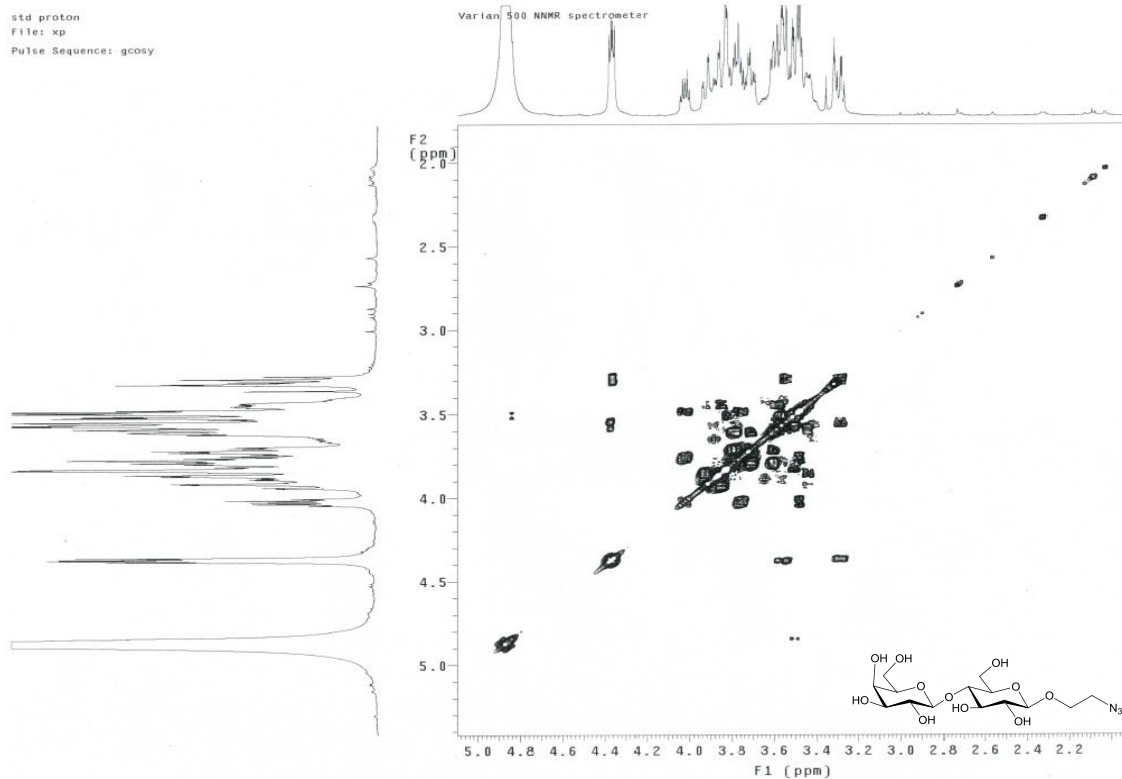

Figure S5.  $^1\text{H}$ - $^1\text{H}$  COSY spectrum of compound **8** ( $\text{CD}_3\text{OD}$ , 500 MHz)

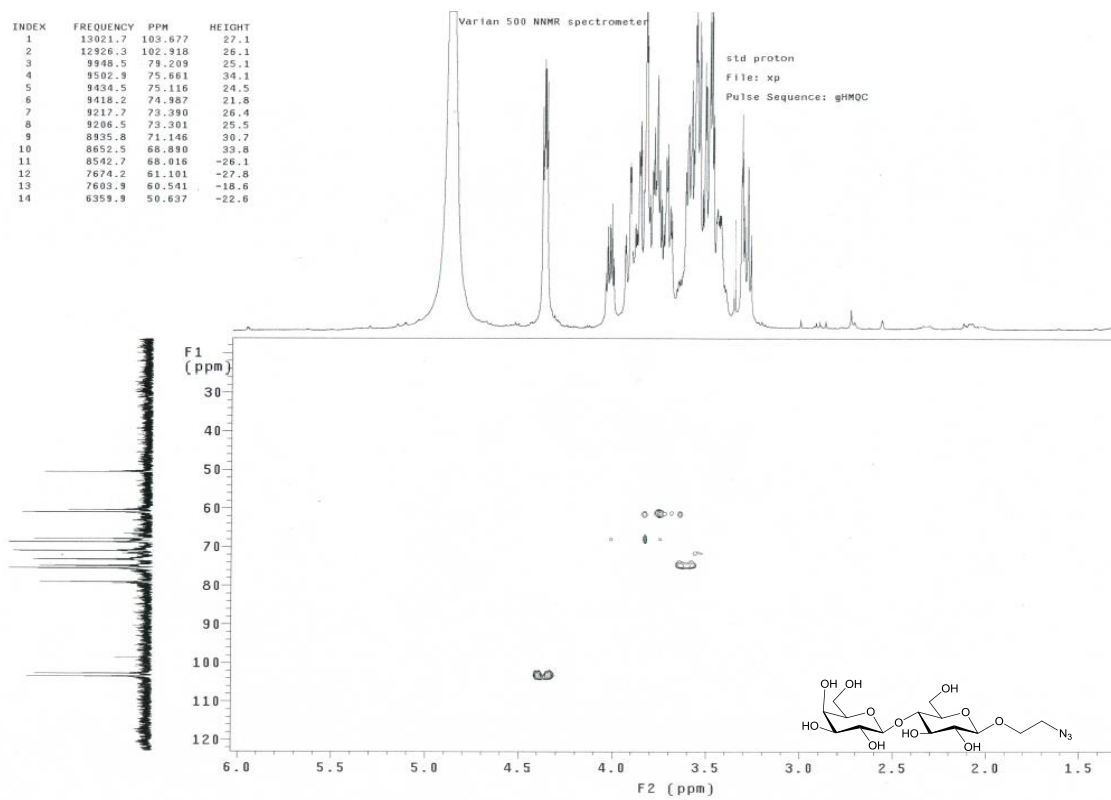

Figure S6.  $^1\text{H}$ - $^{13}\text{C}$  HMQC NMR spectrum of compound **8** ( $\text{CD}_3\text{OD}$ , 500/125 MHz)

Agilent 600 NMR spectrometer

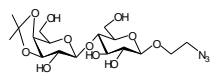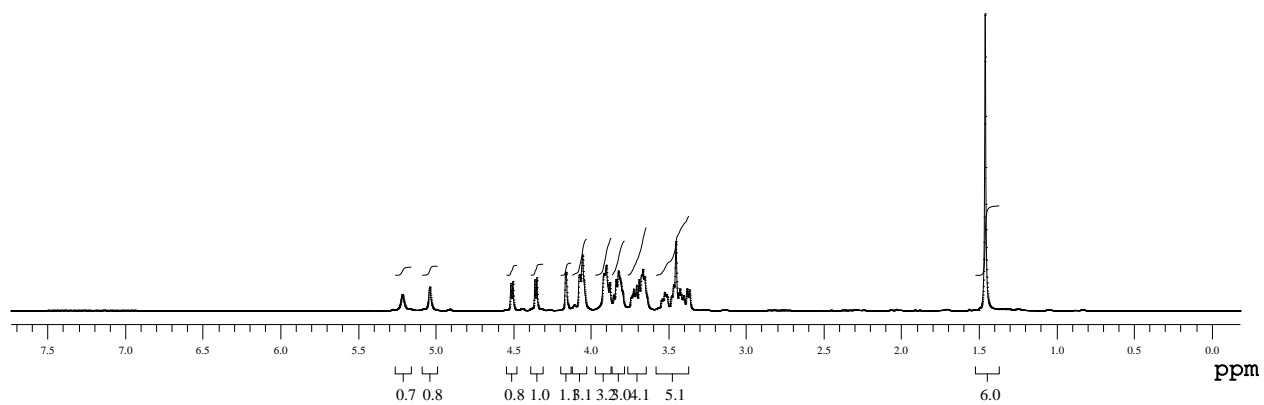

Figure S7.  $^1\text{H}$  NMR spectrum of compound **9** ( $\text{CDCl}_3$ , 600 MHz)

Agilent 600 NMR spectrometer

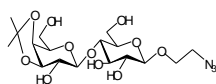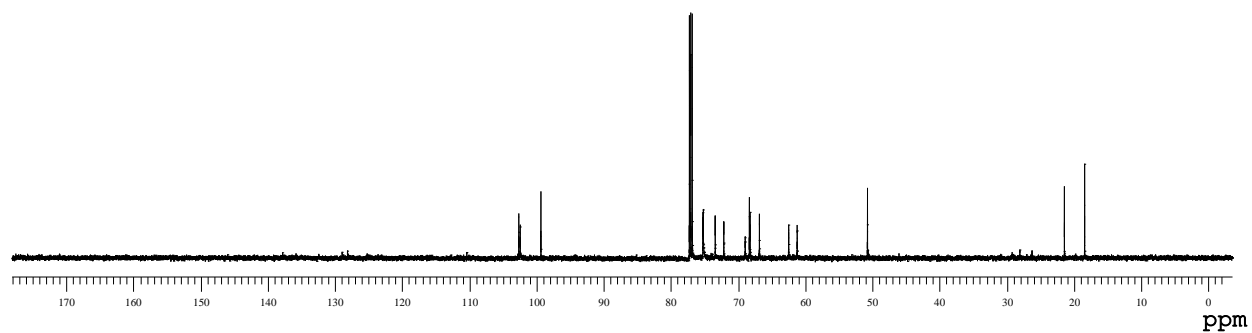

Figure S8.  $^{13}\text{C}$  NMR spectrum of compound **9** ( $\text{CDCl}_3$ , 150 MHz)

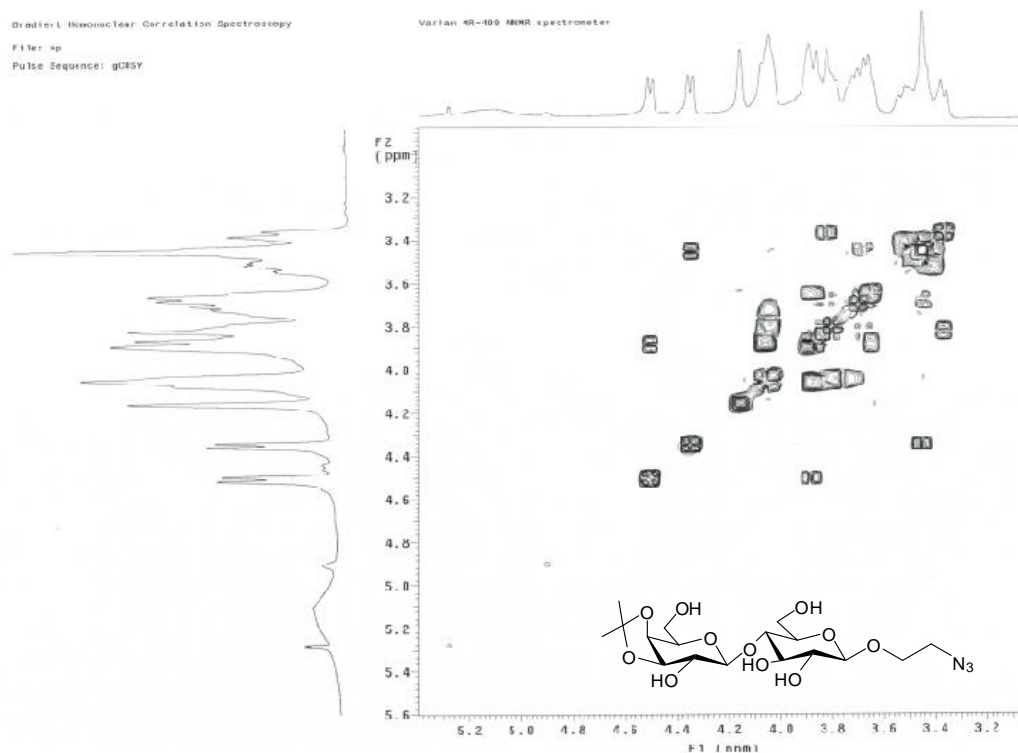

Figure S9.  $^1\text{H}$ - $^1\text{H}$  COSY spectrum of compound **9** ( $\text{CDCl}_3$ , 600 MHz)

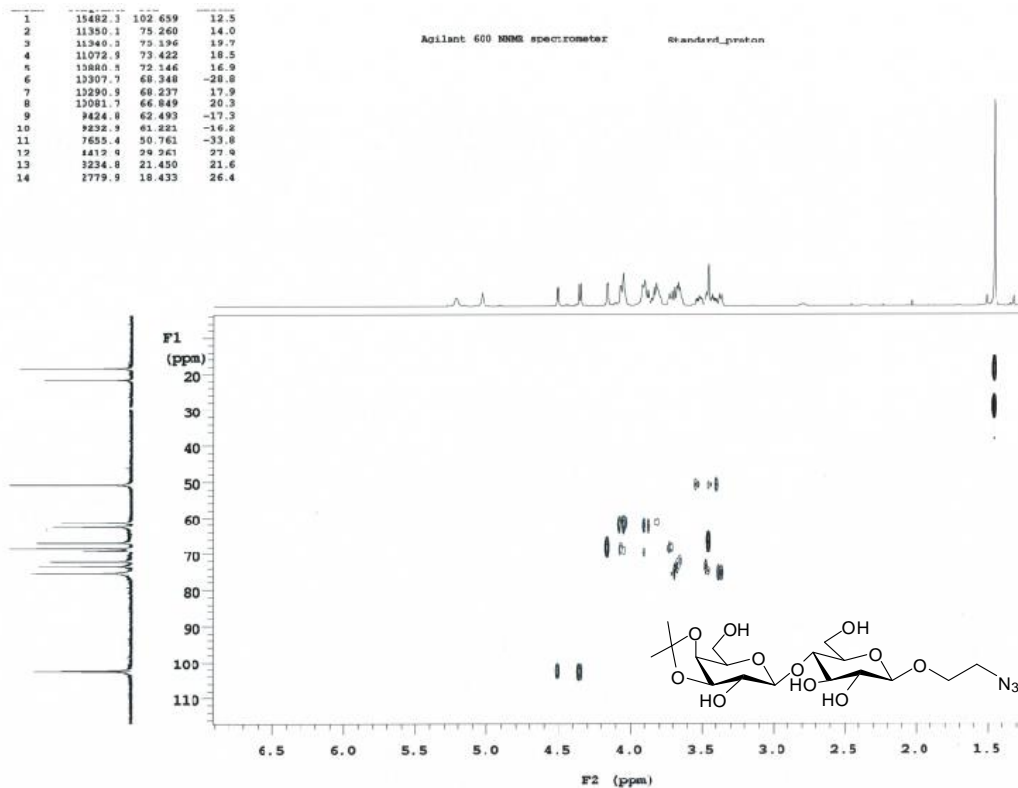

Figure S10.  $^1\text{H}$ - $^{13}\text{C}$  HMQC NMR spectrum of compound **9** ( $\text{CDCl}_3$ , 600/150 MHz)



Varian MR-400 NMR spectrometer

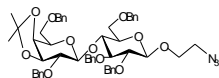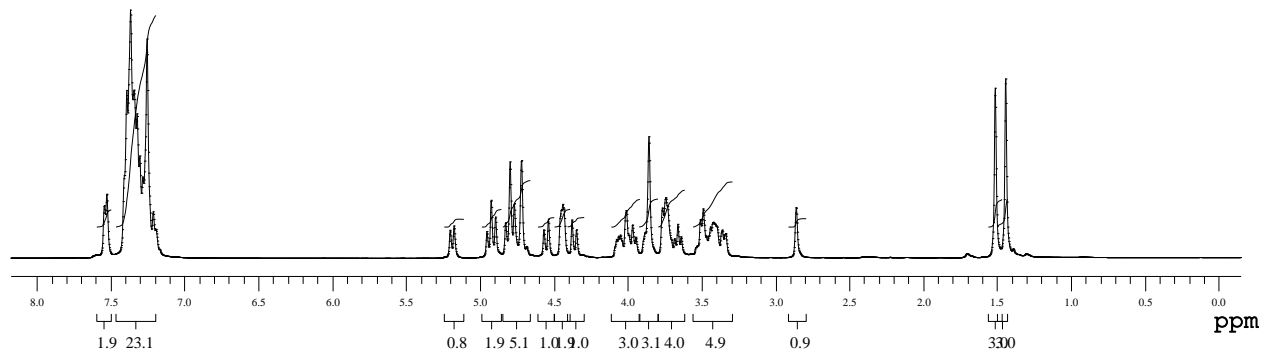

Figure S11. <sup>1</sup>H NMR spectrum of compound **10** (CDCl<sub>3</sub>, 400 MHz)

Varian MR-400 NMR spectrometer

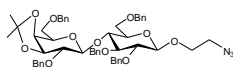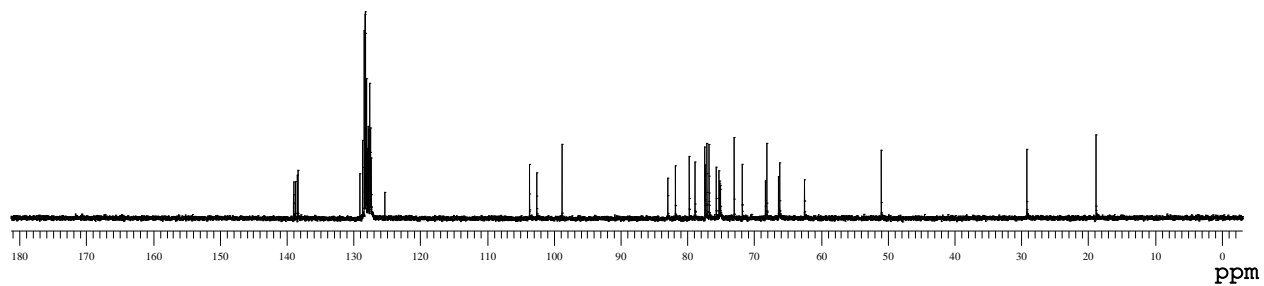

Figure S12. <sup>13</sup>C NMR spectrum of compound **10** (CDCl<sub>3</sub>, 100 MHz)

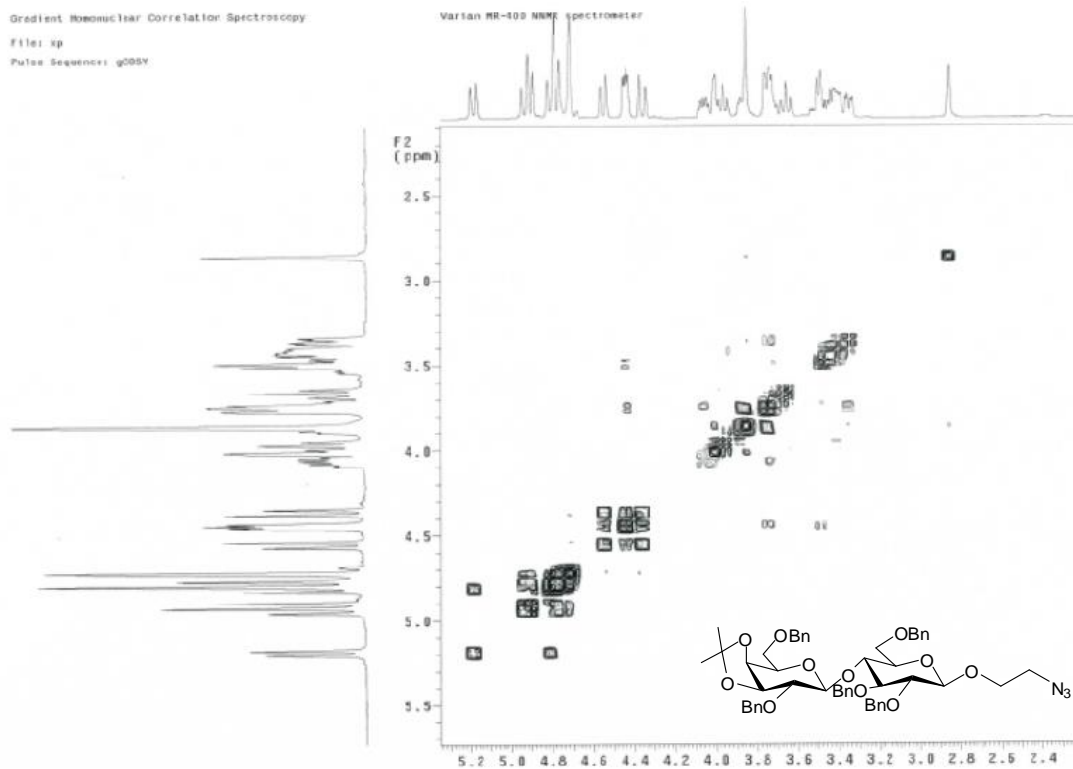

Figure S13.  $^1\text{H}$ - $^1\text{H}$  COSY spectrum of compound 10 ( $\text{CDCl}_3$ , 400 MHz)

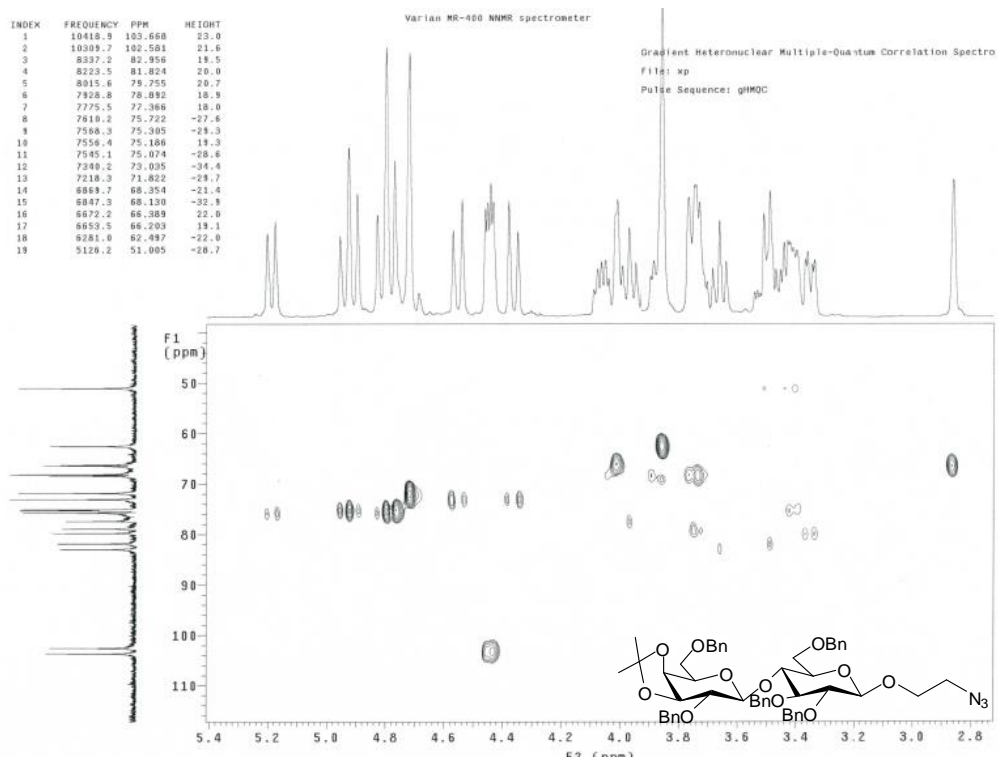

Figure S14.  $^1\text{H}$ - $^{13}\text{C}$  HMQC NMR spectrum of compound 10 ( $\text{CDCl}_3$ , 400/100 MHz)

Agilent 600 NMR spectrometer

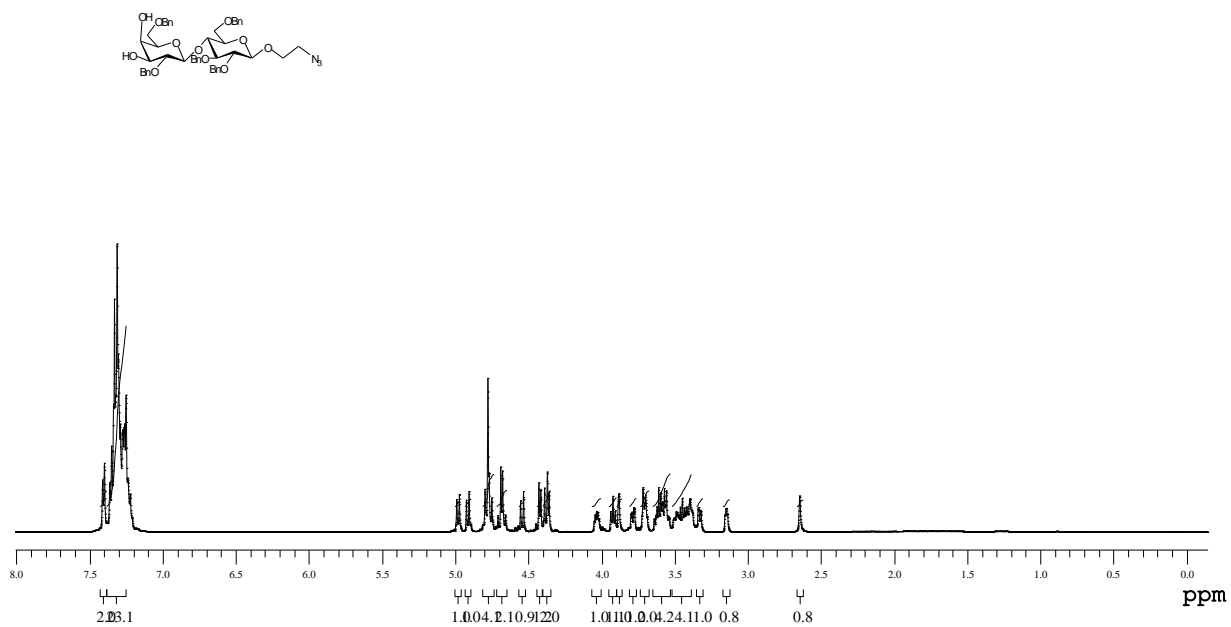

Figure S15. <sup>1</sup>H NMR spectrum of compound 5 (CDCl<sub>3</sub>, 600 MHz)

Agilent 600 NMR spectrometer

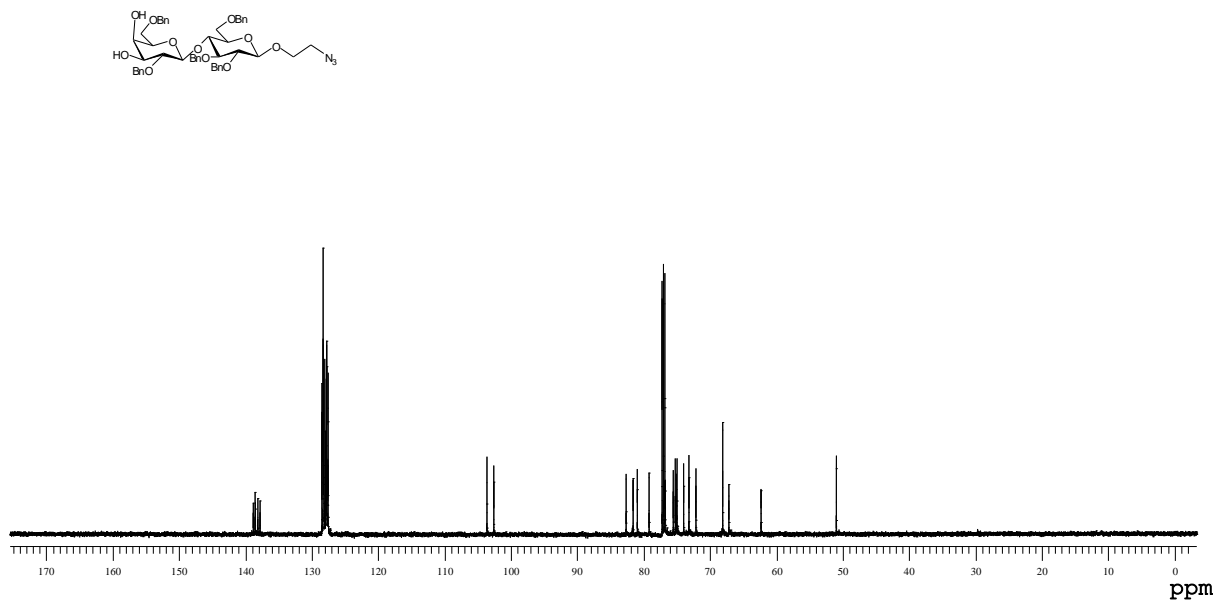

Figure S16. <sup>13</sup>C NMR spectrum of compound 5 (CDCl<sub>3</sub>, 150 MHz)

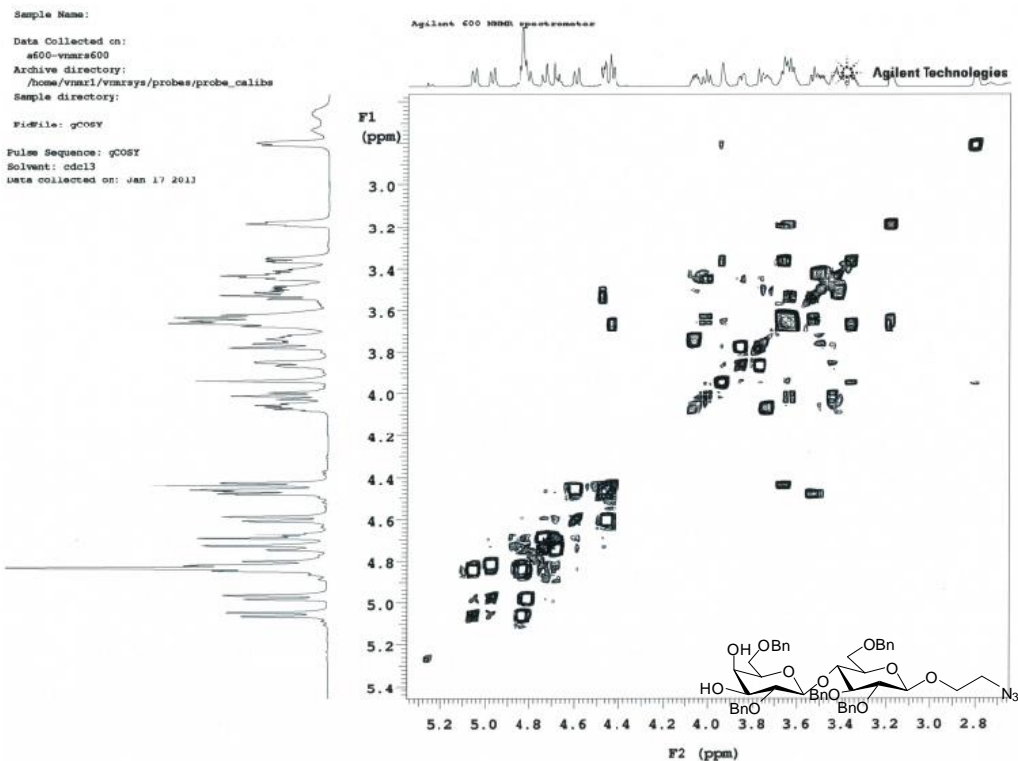

Figure S17.  $^1\text{H}$ - $^1\text{H}$  COSY spectrum of compound **5** ( $\text{CDCl}_3$ , 600 MHz)

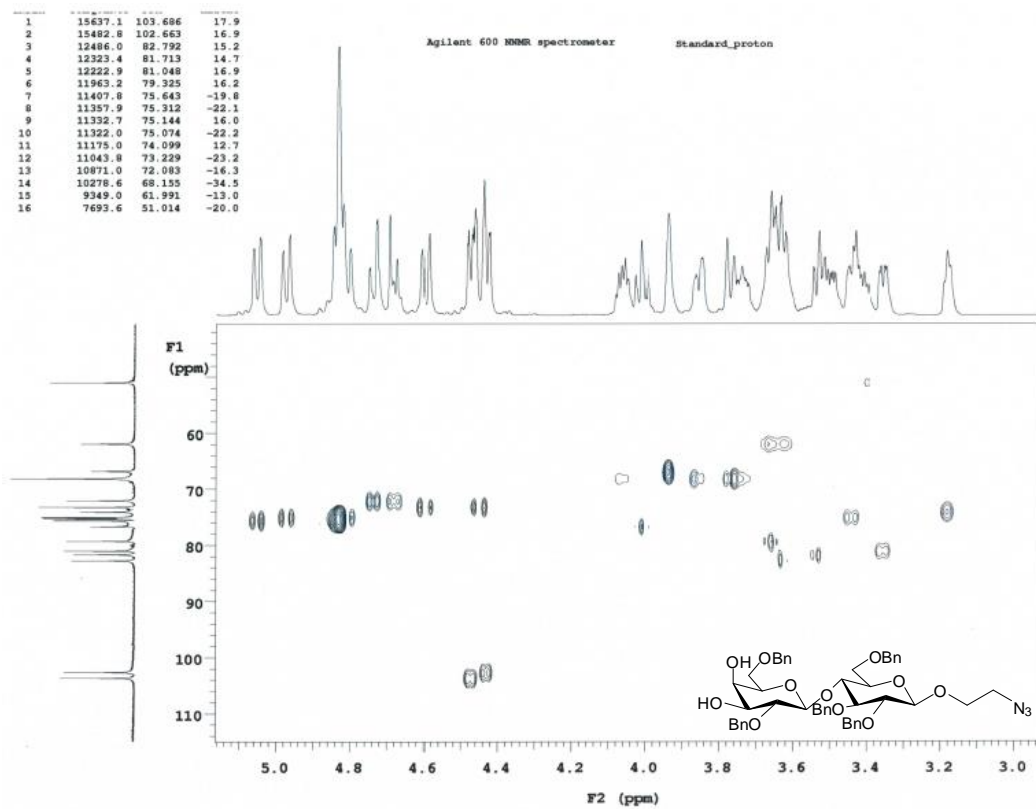

Figure S18.  $^1\text{H}$ - $^{13}\text{C}$  HMQC NMR spectrum of compound **5** ( $\text{CDCl}_3$ , 600/150 MHz)

Elemental Composition Report

Page

Single Mass Analysis

Tolerance = 5.0 PPM / DBE: min = -1.5, max = 100.0  
 Element prediction: Off  
 Number of isotope peaks used for i-FIT = 6

Monoisotopic Mass, Even Electron Ions  
 1662 formula(e) evaluated with 9 results within limits (all results (up to 1000) for each mass)  
 Elements Used:

C: 0-100 H: 0-1000 N: 0-5 O: 0-13 23Na: 0-1

SATADRU MANDAL SSM-Lactose-De-Acetonide

2013\_0131\_3082\_2-16 (0.350) Cm (15.205-1.8x2.000)

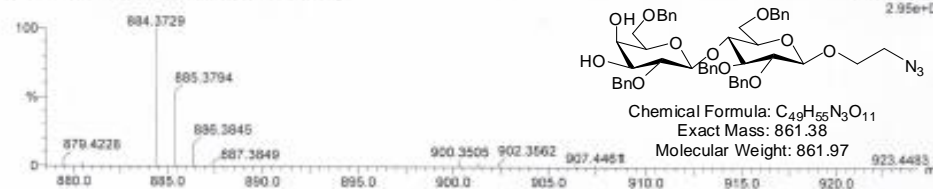

Chemical Formula: C<sub>49</sub>H<sub>55</sub>N<sub>3</sub>O<sub>11</sub>  
 Exact Mass: 861.38  
 Molecular Weight: 861.97

| Mass     | Calc. Mass | ΔDa  | PPM  | DBE  | i-FIT | i-FIT (Norm) | Formula           |
|----------|------------|------|------|------|-------|--------------|-------------------|
| 884.3729 | 884.3734   | -0.5 | -0.6 | 23.5 | 46.4  | 1.6          | C49 H55 N3 O11 -  |
|          |            |      |      |      |       |              | 238a              |
|          | 884.3758   | -2.9 | -3.3 | 26.5 | 46.6  | 1.8          | C51 H54 N3 O11    |
|          | 884.3718   | 1.1  | 1.2  | 22.5 | 47.0  | 2.1          | C46 H54 N5 O13    |
|          | 884.3753   | -2.4 | -2.7 | 44.5 | 47.1  | 2.2          | C64 H46 N5        |
|          | 884.3729   | 0.0  | 0.0  | 41.5 | 47.1  | 2.2          | C62 H47 N5 338a   |
|          | 884.3740   | -1.1 | -1.2 | 39.5 | 47.2  | 2.4          | C63 H50 N O4      |
|          | 884.3694   | 3.5  | 4.0  | 19.5 | 47.3  | 2.5          | C44 H55 N5 O13    |
|          |            |      |      |      |       |              | 238a              |
|          | 884.3716   | 1.3  | 1.5  | 36.5 | 47.5  | 2.6          | C61 H51 N O4 238a |
|          | 884.3700   | 2.9  | 3.3  | 35.5 | 48.1  | 3.3          | C58 H50 N3 O6     |

Figure S19. HR ESI-TOF MS spectrum of compound 5

Mercury 400 spectrometer

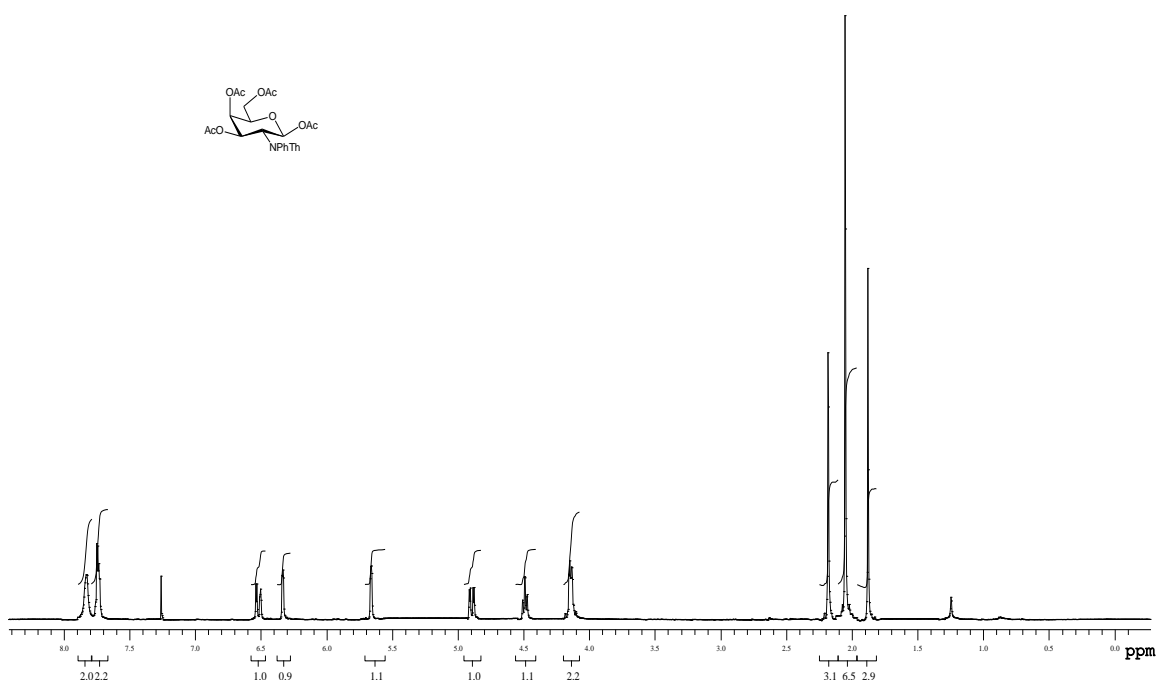

Figure S20. <sup>1</sup>H NMR spectrum of compound 12 (CDCl<sub>3</sub>, 400 MHz)

Mercury 400 spectrometer

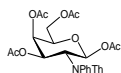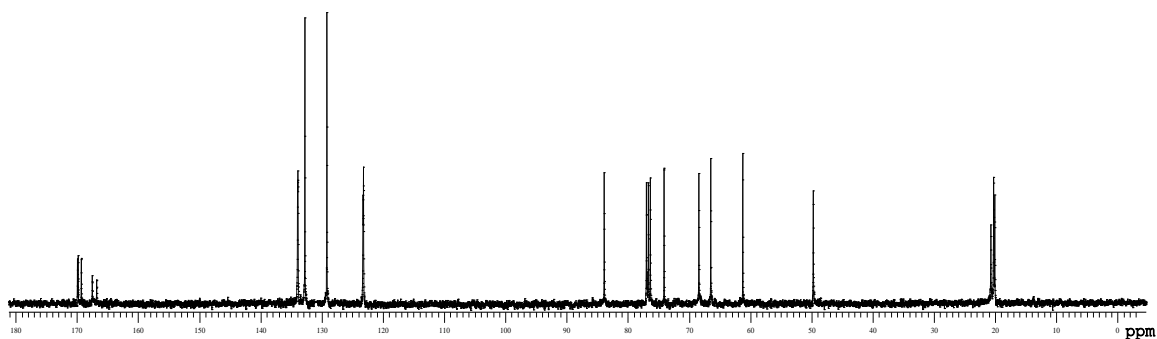

Figure S21. <sup>13</sup>C NMR spectrum of compound 12 (CDCl<sub>3</sub>, 100 MHz)

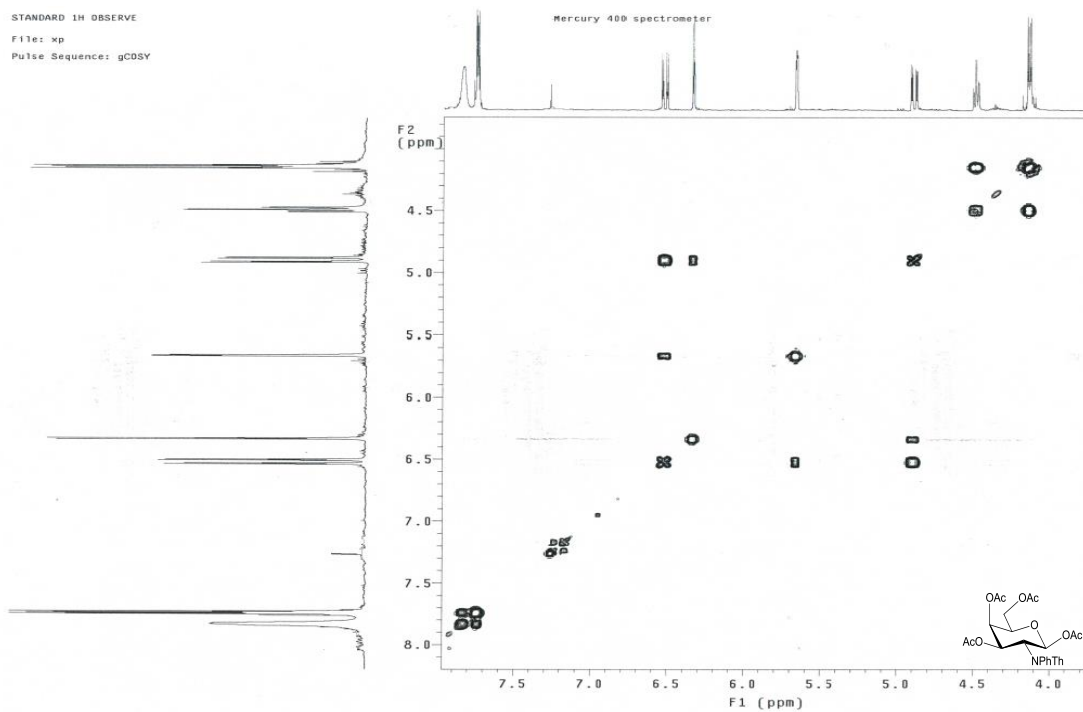

Figure S22. <sup>1</sup>H-<sup>1</sup>H COSY spectrum of compound 12 (CDCl<sub>3</sub>, 400 MHz)

Mercury 400 spectrometer

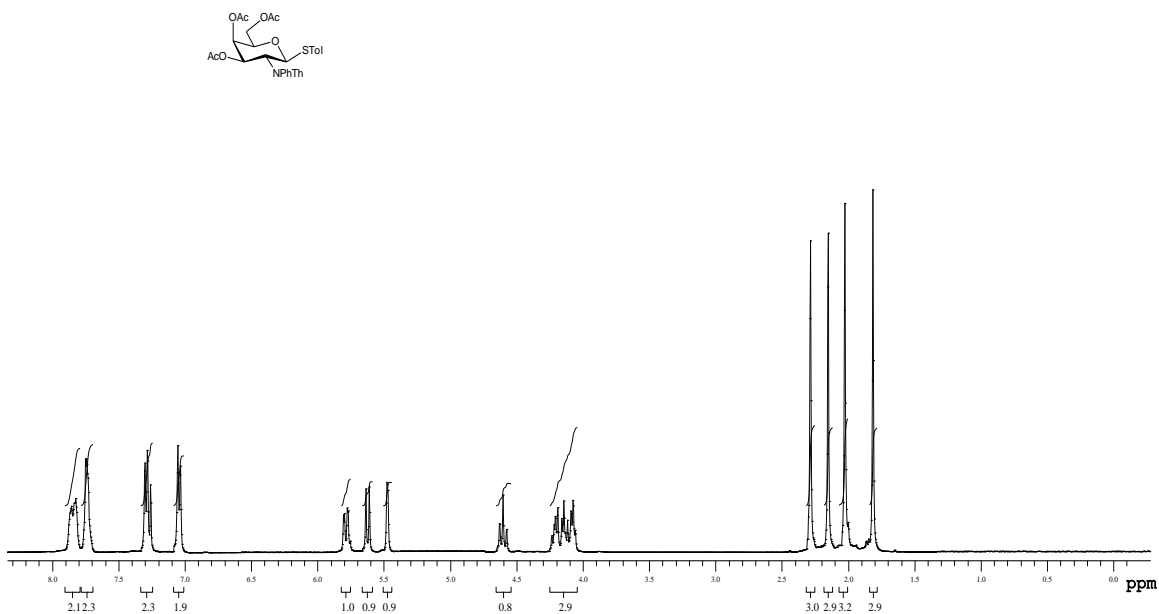

Figure S23. <sup>1</sup>H NMR spectrum of compound 13 (CDCl<sub>3</sub>, 400 MHz)

Mercury 400 spectrometer

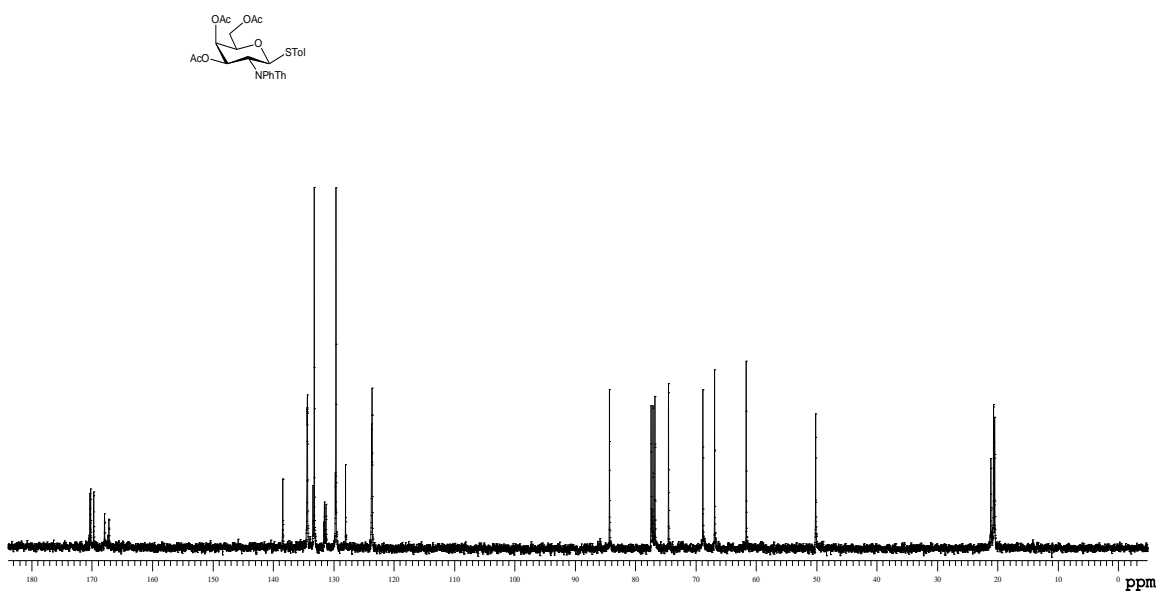

Figure S24. <sup>13</sup>C NMR spectrum of compound 13 (CDCl<sub>3</sub>, 100 MHz)

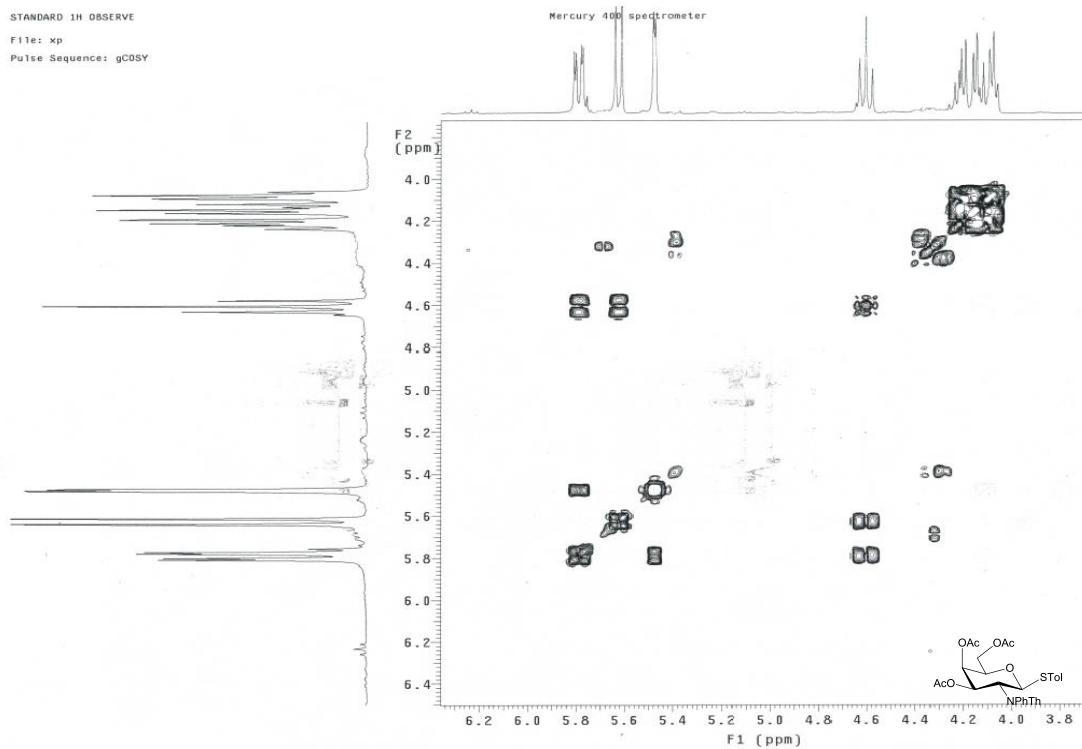

**Figure S25.**  $^1\text{H}$ - $^1\text{H}$  COSY spectrum of compound **12** ( $\text{CDCl}_3$ , 400 MHz)

Agilent 600 NMR spectrometer

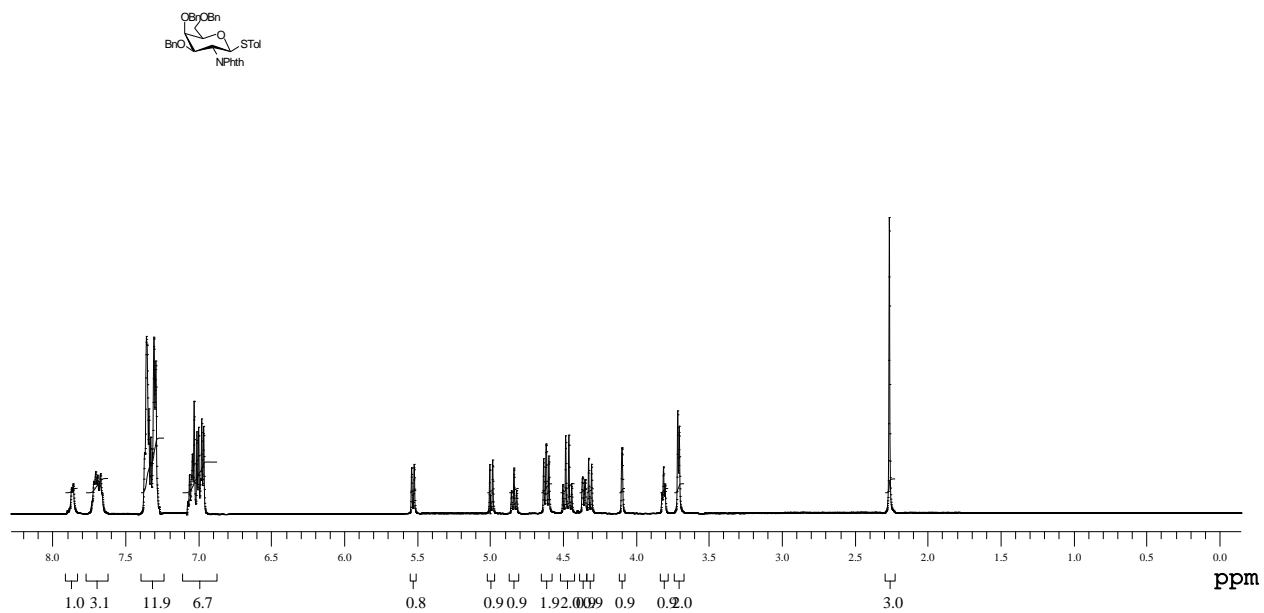

**Figure S26.**  $^1\text{H}$  NMR spectrum of compound **6** ( $\text{CDCl}_3$ , 600 MHz)



Agilent 600 NMR spectrometer

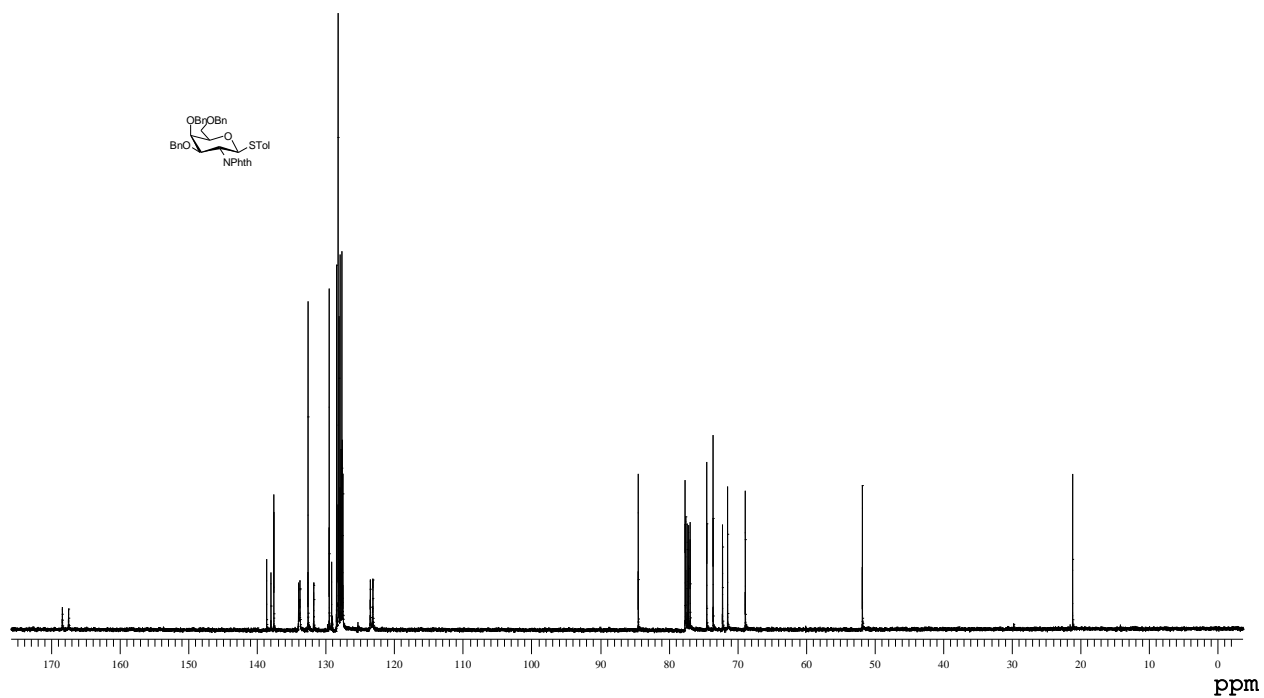

Figure S27.  $^{13}\text{C}$  NMR spectrum of compound 6 ( $\text{CDCl}_3$ , 150 MHz)

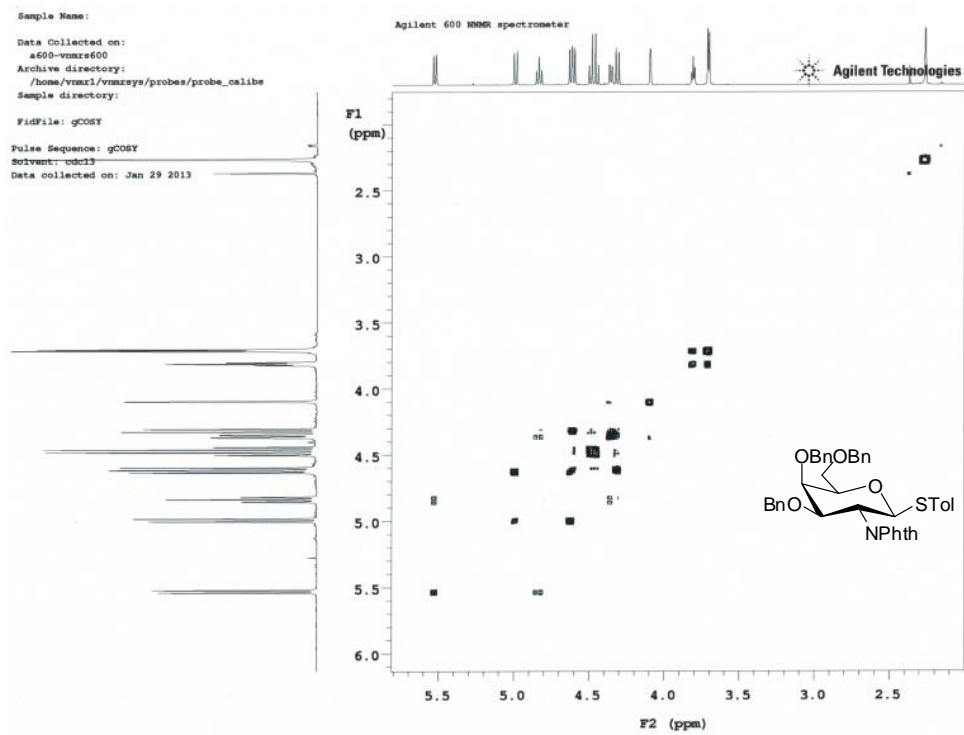

Figure S28.  $^1\text{H}$ - $^1\text{H}$  COSY Spectrum of compound 6 ( $\text{CDCl}_3$ , 600 MHz)

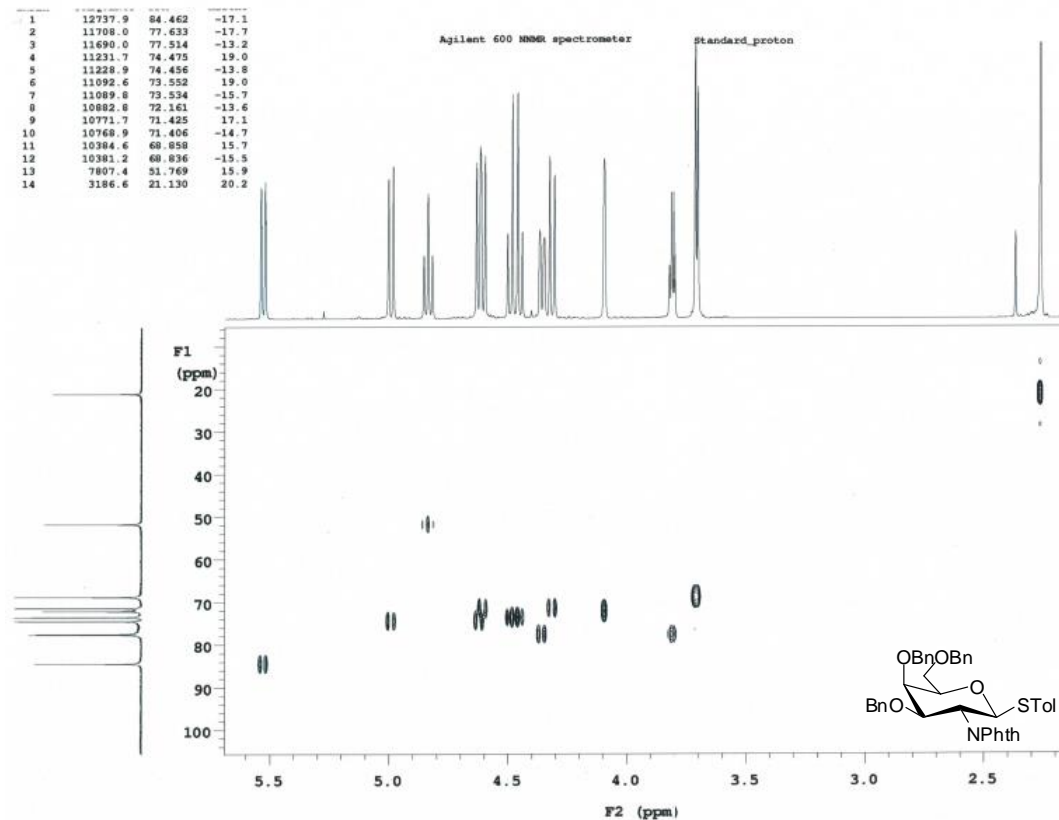

Figure S29.  $^1\text{H}$ - $^{13}\text{C}$  HMQC NMR spectrum of compound **6** ( $\text{CDCl}_3$ , 600/150 MHz)

Elemental Composition Report

Single Mass Analysis

Tolerance = 5.0 PPM / DBE: min = -1.5, max = 100.0  
 Element prediction: Off  
 Number of isotope peaks used for i-FIT = 6

Monoisotopic Mass, Even Electron Ions

1339 formula(s) evaluated with 10 results within limits (all results (up to 1000) for each mass)

Elements Used:

C: 0-100 H: 0-1000 N: 0-3 O: 0-10  $^{23}\text{Na}$ : 0-1 S: 1-2

SATADRU MANDAL SSM-Gal-Amine-OBn

2013\_0131\_3061 32 (0.687) Cm (29-36:1:4x2.000)

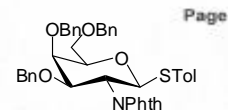

Chemical Formula:  $\text{C}_{42}\text{H}_{39}\text{NO}_6\text{S}$

Exact Mass: 685.25

Molecular Weight: 685.83

LCT2008-07b pro 2010-ci.ac.LCT Pharm  
 1: TOF MS ES  
 1.11e+0

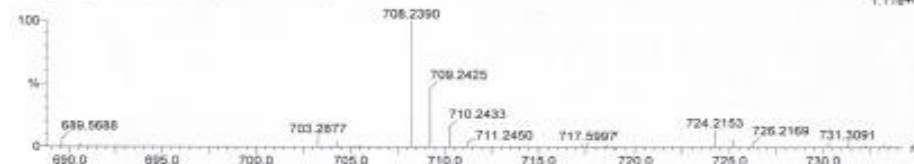

| Mass     | Calc. Mass | ΔP.P. | ΔS.S. | DBE  | i-FIT | i-FIT (Norm) | Formula                                                    |
|----------|------------|-------|-------|------|-------|--------------|------------------------------------------------------------|
| 708.2390 | 708.2396   | -0.6  | -0.8  | 23.5 | 34.4  | 0.4          | $\text{C}_{42}\text{H}_{39}\text{N}\text{O}_6\text{SNa}$   |
|          | 708.2380   | 1.0   | 1.4   | 22.5 | 35.3  | 1.4          | $\text{C}_{39}\text{H}_{38}\text{N}_3\text{O}_8\text{S}$   |
|          | 708.2420   | -3.0  | -4.2  | 26.5 | 37.0  | 3.0          | $\text{C}_{44}\text{H}_{38}\text{N}\text{O}_6\text{S}$     |
|          | 708.2361   | 2.9   | 4.1   | 35.5 | 37.8  | 3.9          | $\text{C}_{51}\text{H}_{34}\text{K}\text{O}_8\text{S}$     |
|          | 708.2356   | 3.4   | 4.8   | 19.5 | 37.9  | 4.0          | $\text{C}_{37}\text{H}_{39}\text{N}_3\text{O}_8\text{SNa}$ |
|          | 708.2395   | -0.5  | -0.7  | 30.5 | 39.0  | 5.1          | $\text{C}_{48}\text{H}_{38}\text{N}\text{O}_8\text{S}_2$   |
|          | 708.2413   | -2.3  | -3.2  | 17.5 | 40.5  | 6.4          | $\text{C}_{36}\text{H}_{42}\text{N}_3\text{O}_8\text{S}_2$ |
|          | 708.2389   | 0.1   | 0.1   | 14.5 | 40.4  | 6.4          | $\text{C}_{34}\text{H}_{43}\text{N}_3\text{O}_8\text{SNa}$ |
|          | 708.2371   | 1.9   | 2.7   | 27.5 | 40.5  | 6.6          | $\text{C}_{46}\text{H}_{39}\text{N}\text{O}_8\text{SNa}$   |
|          | 708.2355   | 3.5   | 4.9   | 26.5 | 42.0  | 8.1          | $\text{C}_{43}\text{H}_{38}\text{N}_3\text{O}_3\text{S}_2$ |

Figure S30. HRMS ESI-TOF MS spectrum of compound **6**.

Varian MR-400 NMR spectrometer

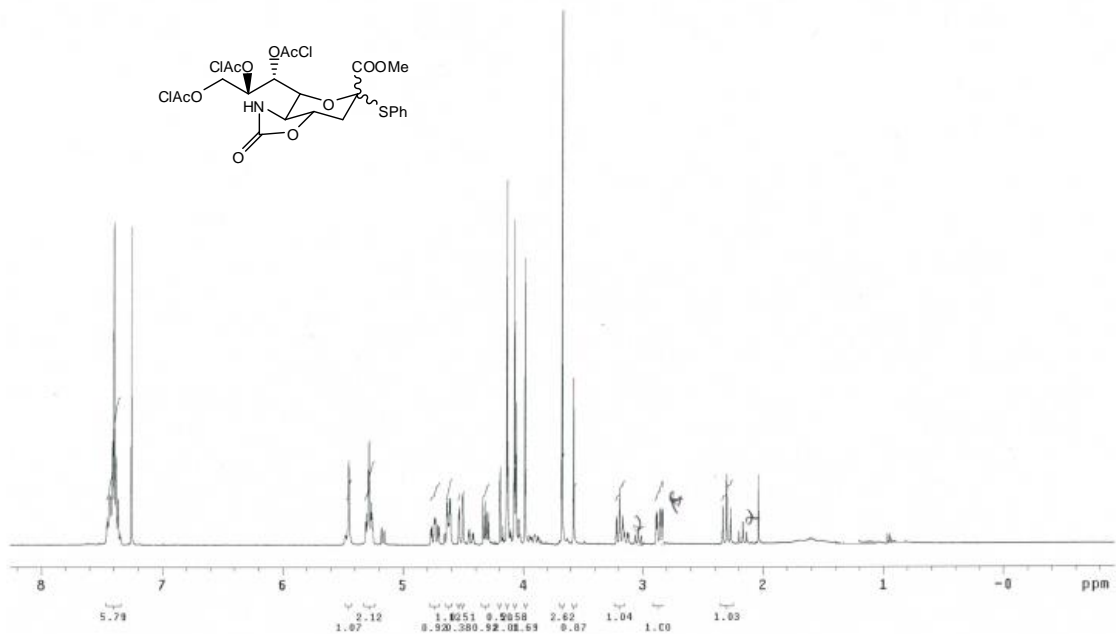

Figure S31. <sup>1</sup>H NMR spectrum of compound 7a (CDCl<sub>3</sub>, 400 MHz)

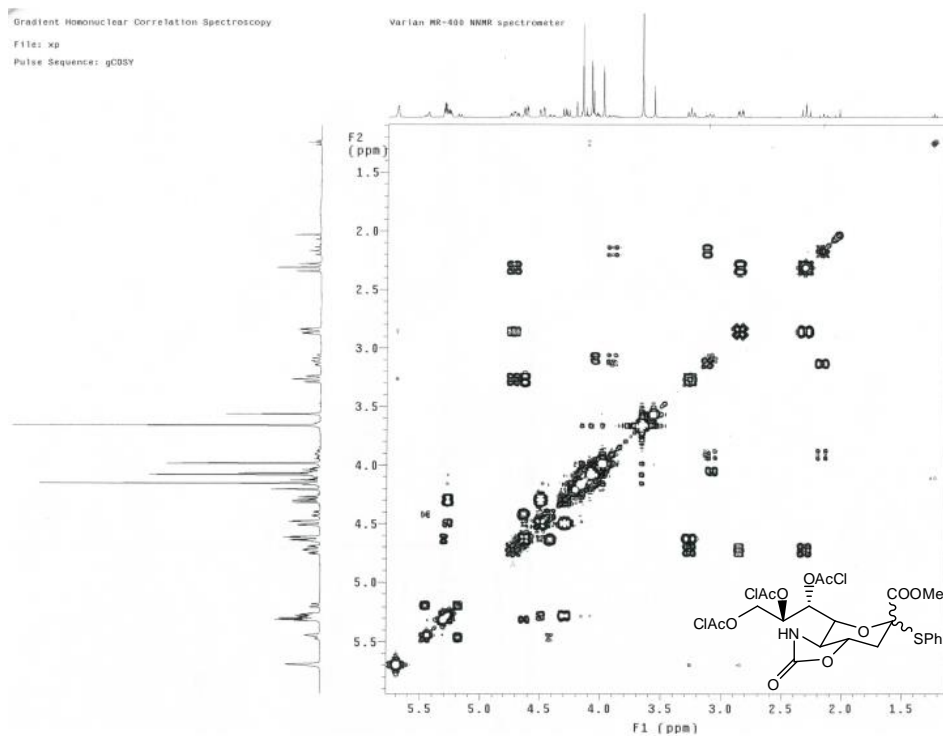

Figure S32. <sup>1</sup>H-<sup>1</sup>H COSY spectrum of compound 7a (CDCl<sub>3</sub>, 400 MHz)

Agilent 600 NMR spectrometer

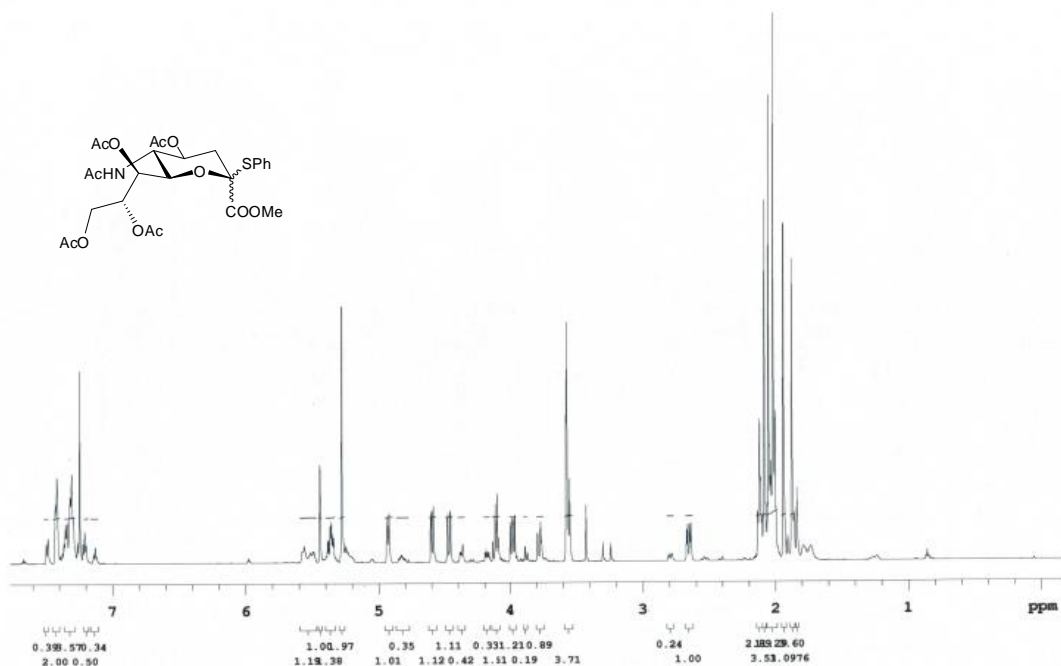

Figure S33. <sup>1</sup>H NMR spectrum of compound 7b (CDCl<sub>3</sub>, 600 MHz)

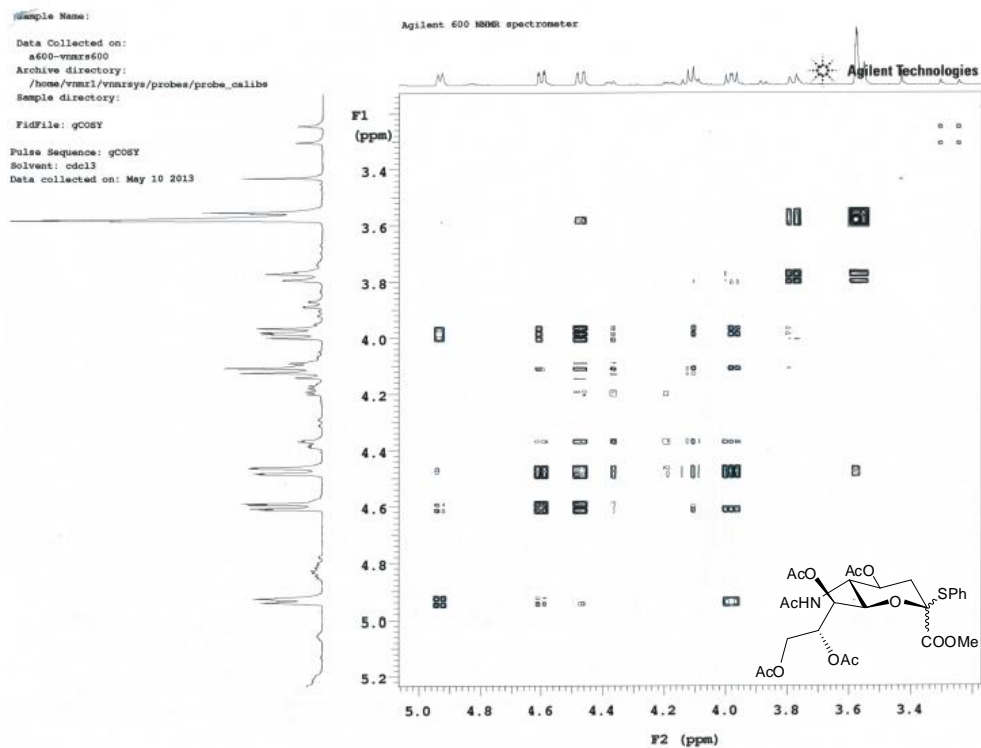

Figure S34. <sup>1</sup>H-<sup>1</sup>H COSY spectrum of compound 7b (CDCl<sub>3</sub>, 600 MHz)

Agilent 600 NMR spectrometer

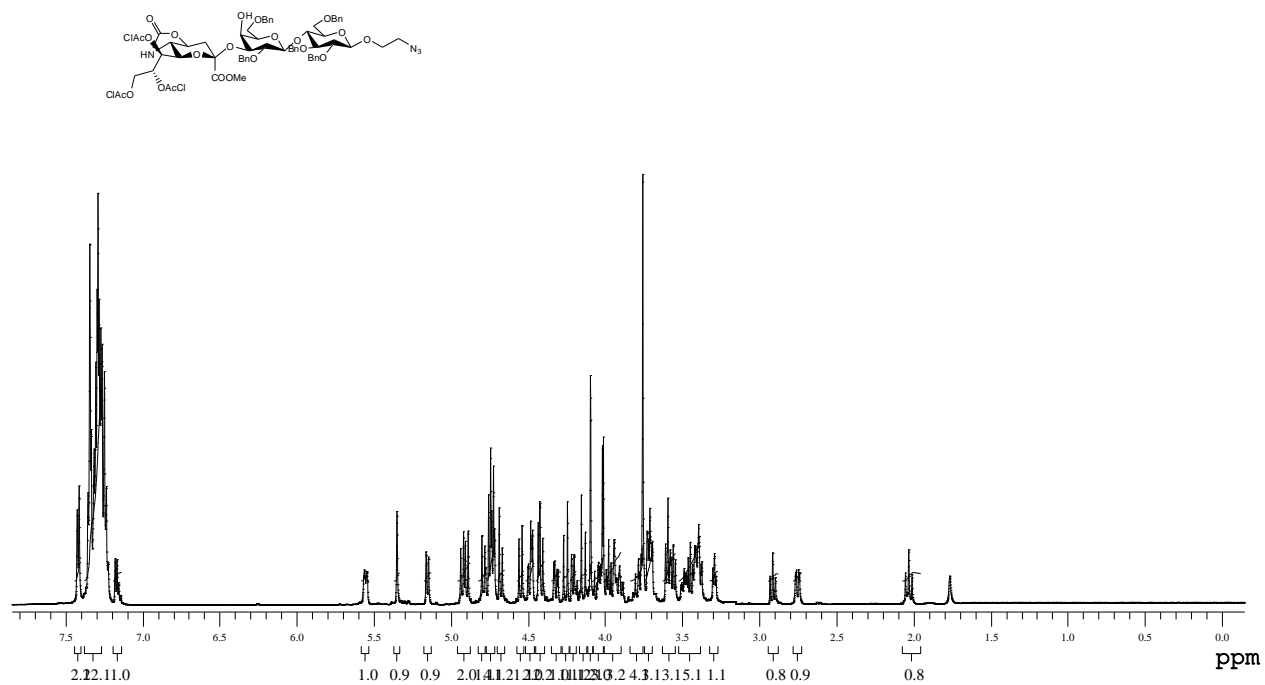

Figure S35. <sup>1</sup>H NMR spectrum of compound 14 (CDCl<sub>3</sub>, 600 MHz)

Agilent 600 NMR spectrometer

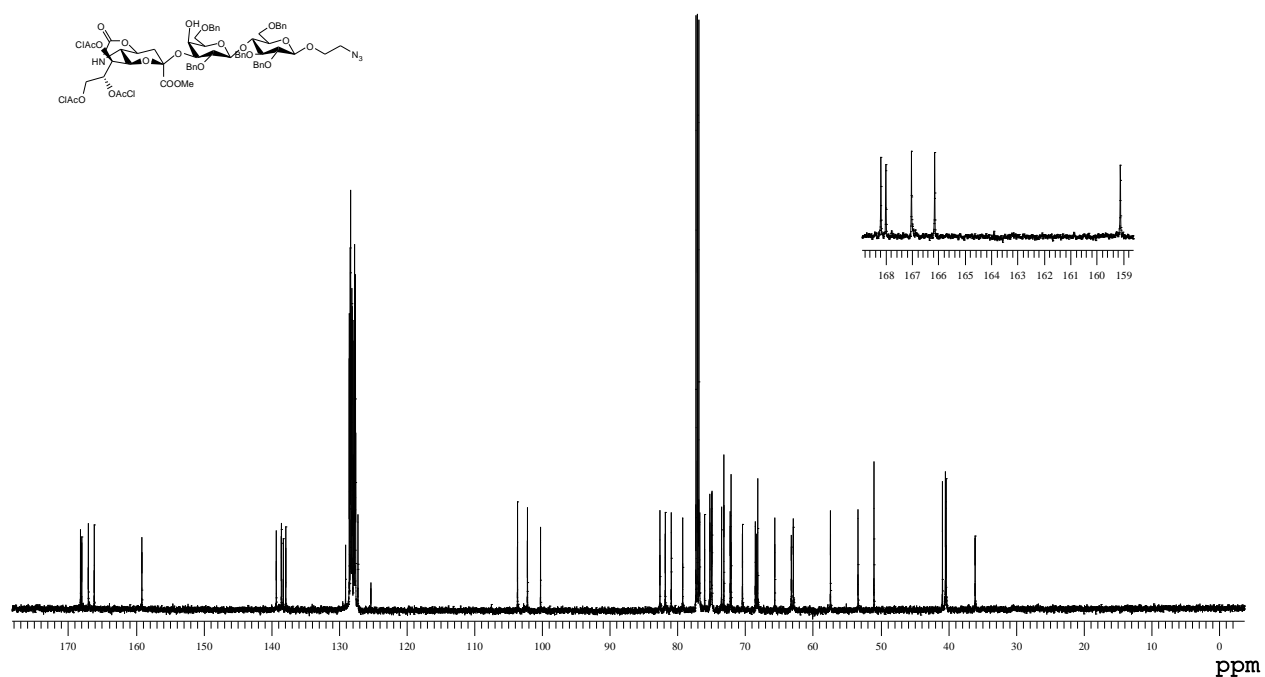

Figure S36. <sup>13</sup>C NMR spectrum of compound 14 (CDCl<sub>3</sub>, 150 MHz)

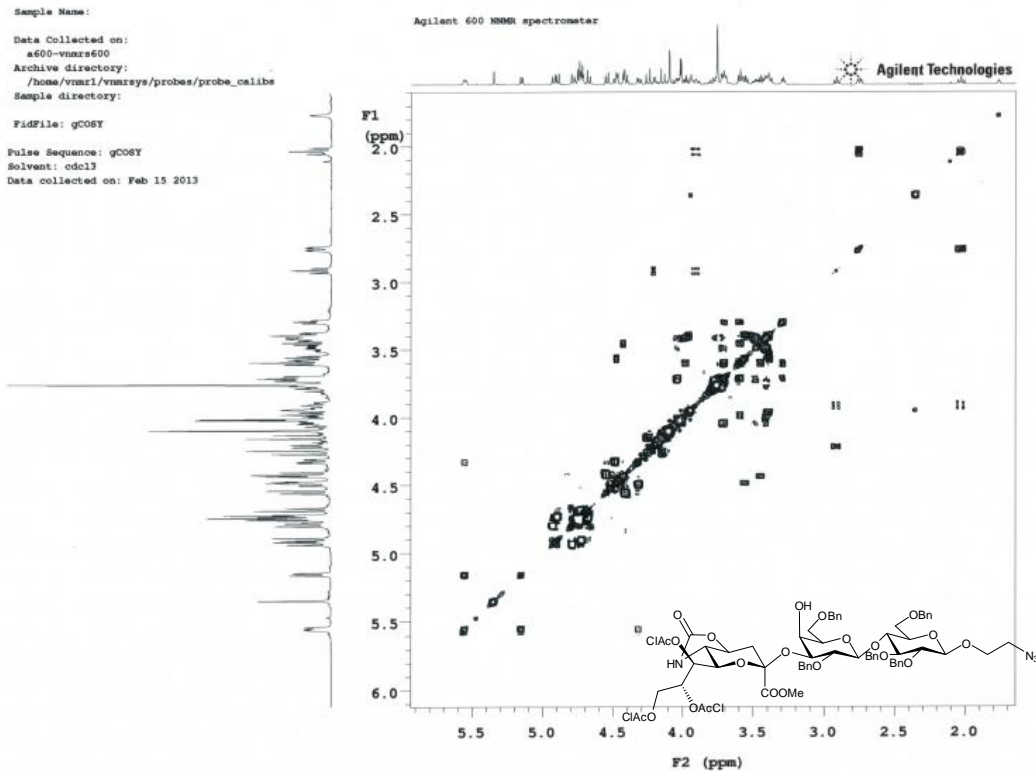

Figure S37.  $^1\text{H}$ - $^1\text{H}$  COSY spectrum of compound 14 ( $\text{CDCl}_3$ , 600 MHz)

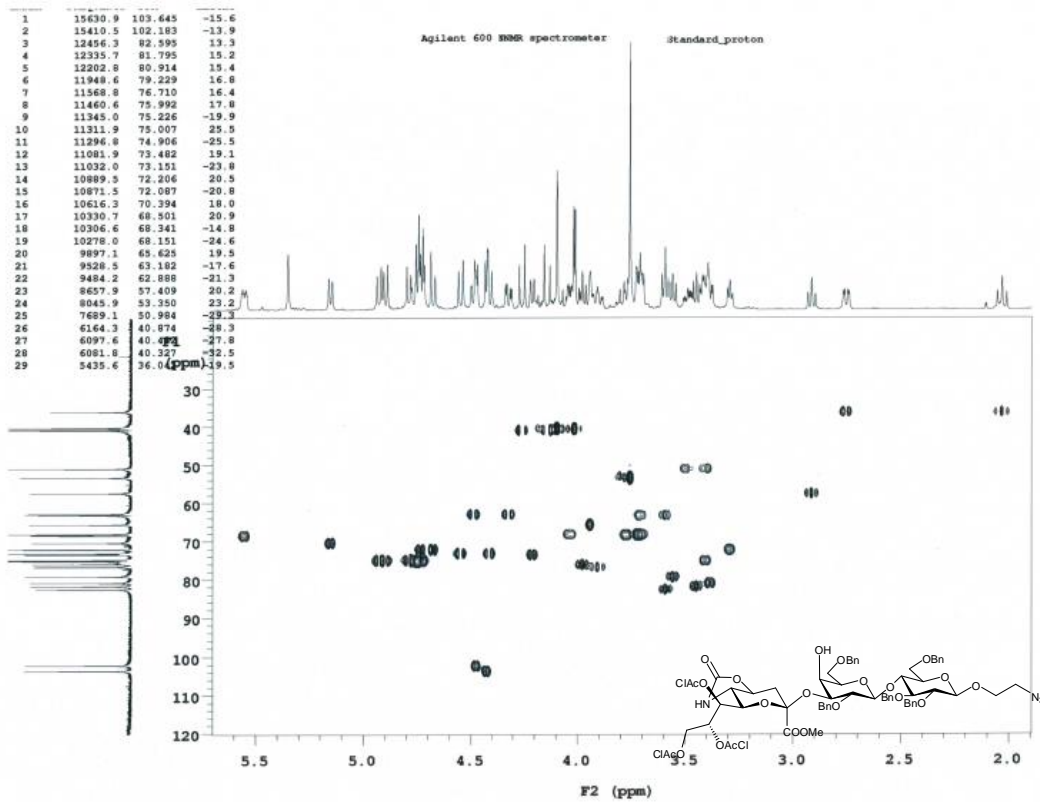

Figure S38.  $^1\text{H}$ - $^{13}\text{C}$  HMQC NMR spectrum of compound 14 ( $\text{CDCl}_3$ , 600/150 MHz)

Elemental Composition Report

Page 1

Single Mass Analysis

Tolerance = 5.0 PPM / DBE: min = -1.5, max = 100.0  
 Element prediction: Off  
 Number of isotope peaks used for i-FIT = 6

Monoisotopic Mass, Even Electron Ions  
 856 formula(e) evaluated with 6 results within limits (all results (up to 1000) for each mass)

Elements Used:  
 C: 0-66 H: 0-200 N: 0-4 O: 0-30 Na: 0-1 Cl: 3-3  
 SATARDU S MANDAL SSM-GM-2-1st Glyco

2013\_0228\_3143\_3 13 (0.246) Cm (10:13-1.8x2.000)

LC 1.2005-078.ppt 2010-08-30 PLCT P1entH  
 1: TOF MS ES  
 1.76e+00

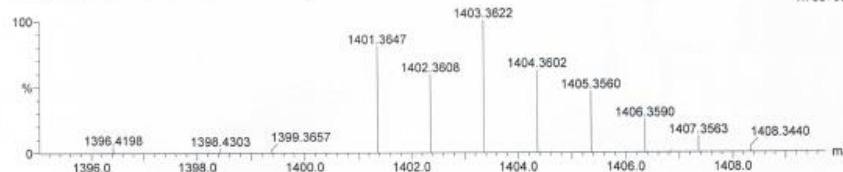

| Mass      | Calc. Mass | mDa  | PPM  | DBE  | i-FIT | i-FIT (Norm) | Formula                |
|-----------|------------|------|------|------|-------|--------------|------------------------|
| 1401.3647 | 1401.3650  | -0.3 | -0.2 | 24.5 | 21.3  | 1.6          | C62 H76 N2 O28 Cl1     |
| 1401.3666 | 1401.3666  | -1.9 | -1.4 | 25.5 | 22.6  | 2.9          | C65 H77 O26 Na Cl1     |
| 1401.3626 | 1401.3626  | 2.1  | 1.5  | 21.5 | 20.4  | 0.7          | C60 H77 N2 O28 Na Cl13 |
| 1401.3680 | 1401.3680  | -3.3 | -2.4 | 30.5 | 23.8  | 4.2          | C66 H73 N4 O22 Na Cl13 |
| 1401.3610 | 1401.3610  | 3.7  | 2.6  | 20.5 | 21.3  | 1.6          | C57 H76 N4 O30 Cl1     |
| 1401.3586 | 1401.3586  | 6.1  | 4.4  | 17.5 | 22.8  | 3.1          | C55 H77 N4 O30 Na Cl13 |

Figure S39. HRMS ESI-TOF MS spectrum of compound 14

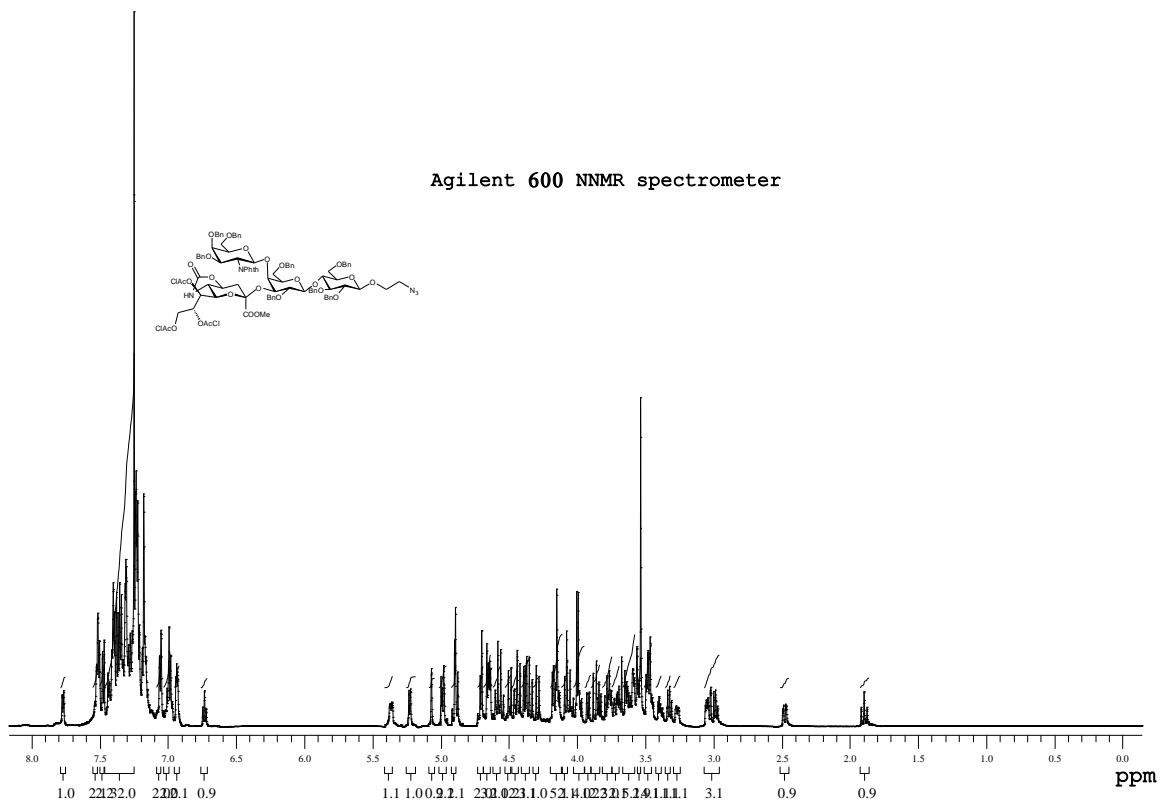

Figure S40. <sup>1</sup>H NMR spectrum of compound 15 (CDCl<sub>3</sub>, 600 MHz)

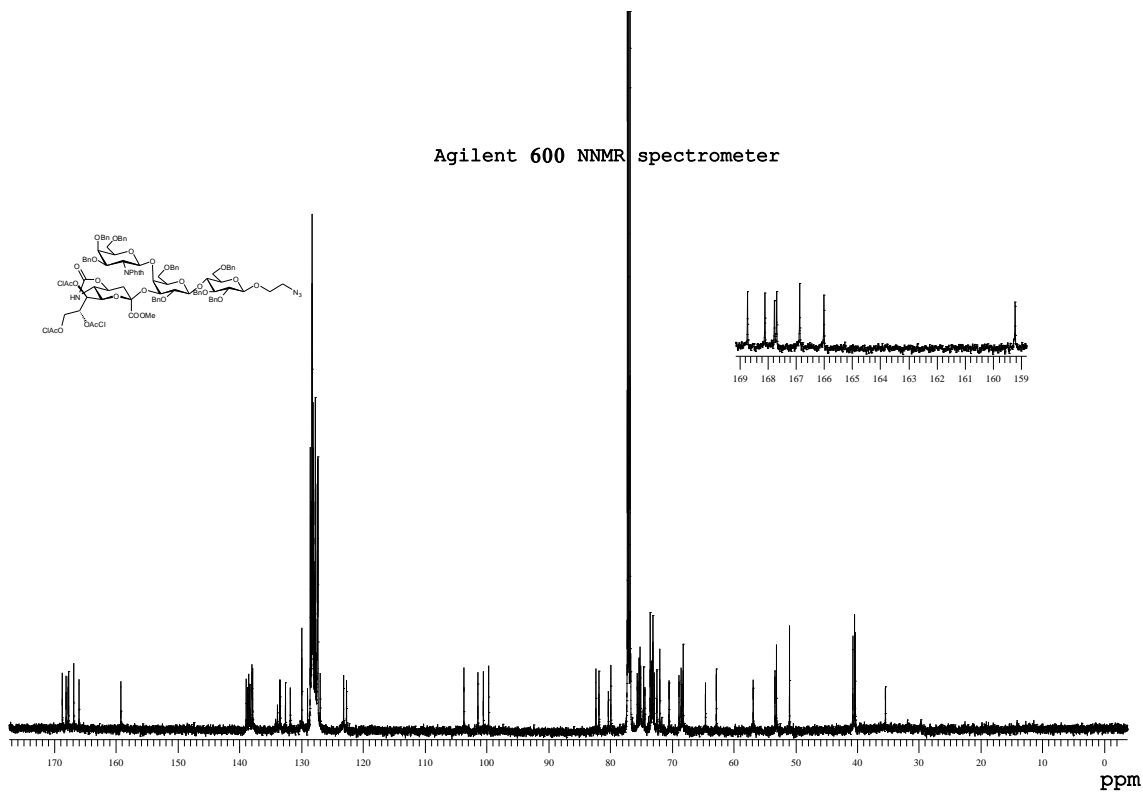

**Figure S41.**  $^{13}\text{C}$  NMR spectrum of compound **15** ( $\text{CDCl}_3$ , 150 MHz)

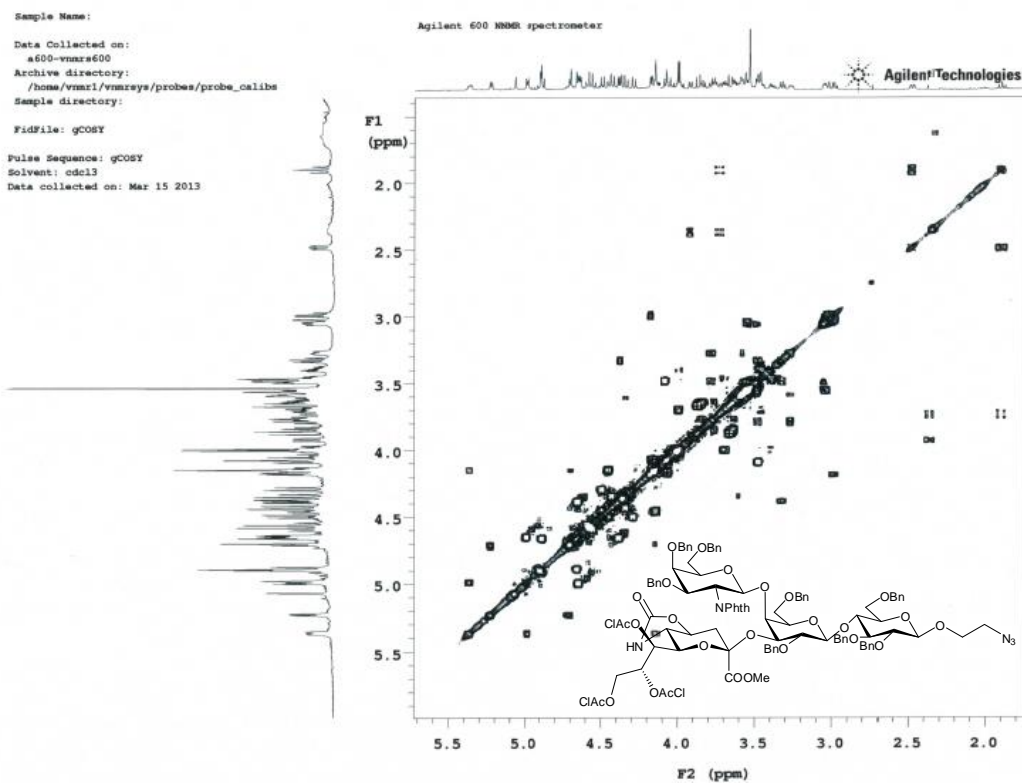

**Figure S42.**  $^1\text{H}$ - $^1\text{H}$  COSY spectrum of compound **15** ( $\text{CDCl}_3$ , 600 MHz)



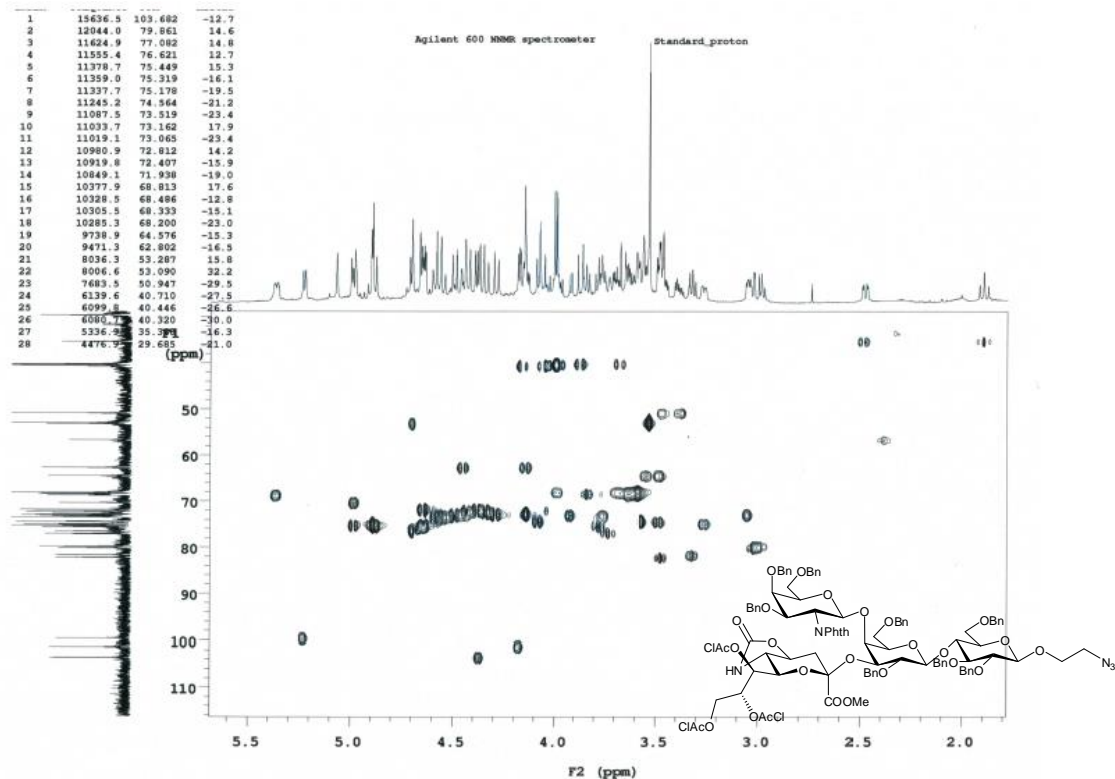

Figure S43.  $^1\text{H}$ - $^{13}\text{C}$  HMQC NMR spectrum of compound **15** ( $\text{CDCl}_3$ , 600/150 MHz)

### Elemental Composition Report

#### Single Mass Analysis

Tolerance = 5.0 PPM / DBE: min = -1.5, max = 100.0  
 Element prediction: Off  
 Number of isotope peaks used for i-FIT = 6

Monoisotopic Mass, Even Electron Ions

607 formula(e) evaluated with 1 results within limits (all results (up to 1000) for each mass)

Elements Used:

C: 0-101 H: 0-200 N: 0-5 O: 0-30 Na: 0-1 Cl: 3-3

SATARDU S MANDAL SSM-GM-2-2nd Glyco

2013\_0228\_3144 14 (0.283) Cm (10.14-1.9x2.000)

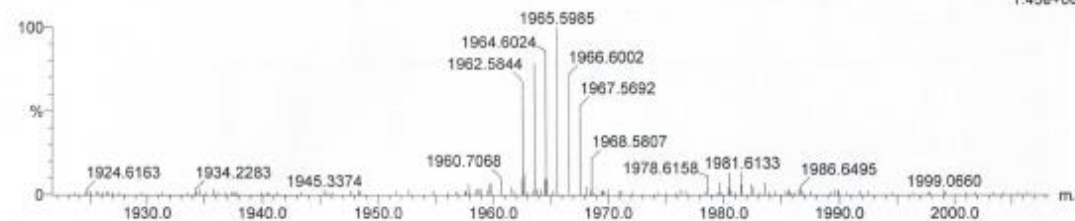

Minimum:

Maximum: 50.0 5.0 -1.5 100.0

| Mass | Calc. Mass | mDa | PPM | DBE | i-FIT | i-FIT (Norm) | Formula |
|------|------------|-----|-----|-----|-------|--------------|---------|
|------|------------|-----|-----|-----|-------|--------------|---------|

|           |           |     |     |      |      |     |                                                                    |
|-----------|-----------|-----|-----|------|------|-----|--------------------------------------------------------------------|
| 1962.5844 | 1962.5831 | 1.3 | 0.7 | 50.5 | 50.6 | 0.0 | $\text{C}_{101}\text{H}_{104}\text{N}_5\text{O}_{28}\text{NaCl}_3$ |
|-----------|-----------|-----|-----|------|------|-----|--------------------------------------------------------------------|

Figure S44. HRMS ESI-TOF MS spectrum of compound **15**

Agilent 600 NNMR spectrometer

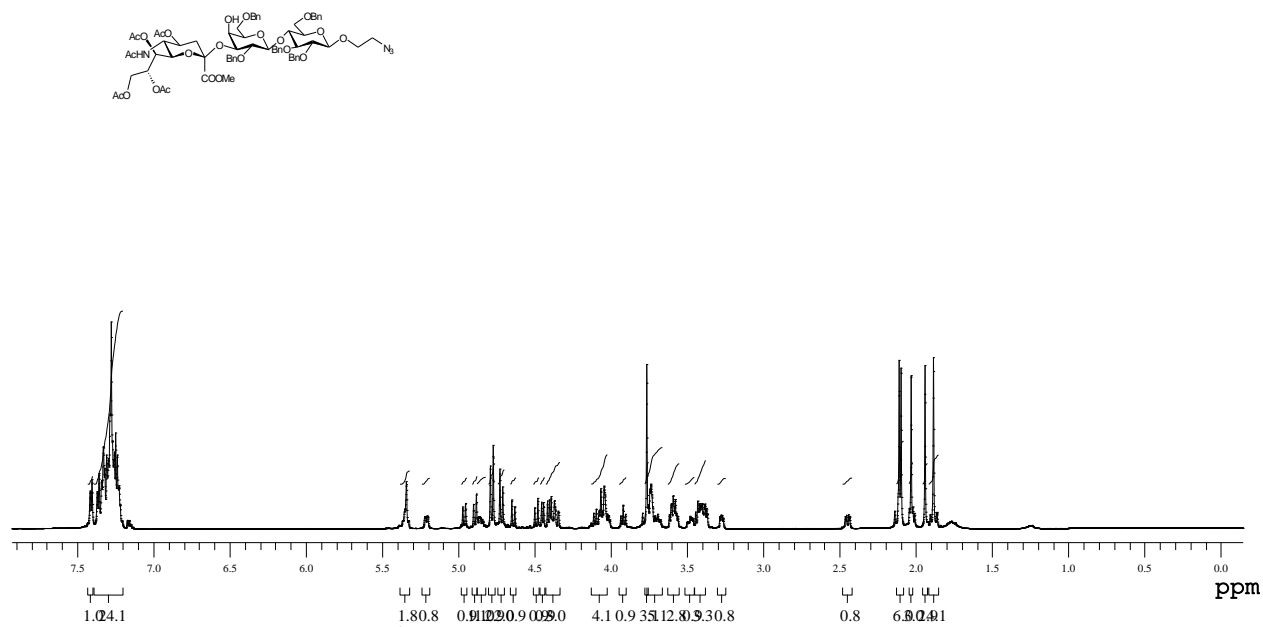

Figure S45. <sup>1</sup>H NMR spectrum of compound 16 (CDCl<sub>3</sub>, 600 MHz)

Agilent 600 NNMR spectrometer

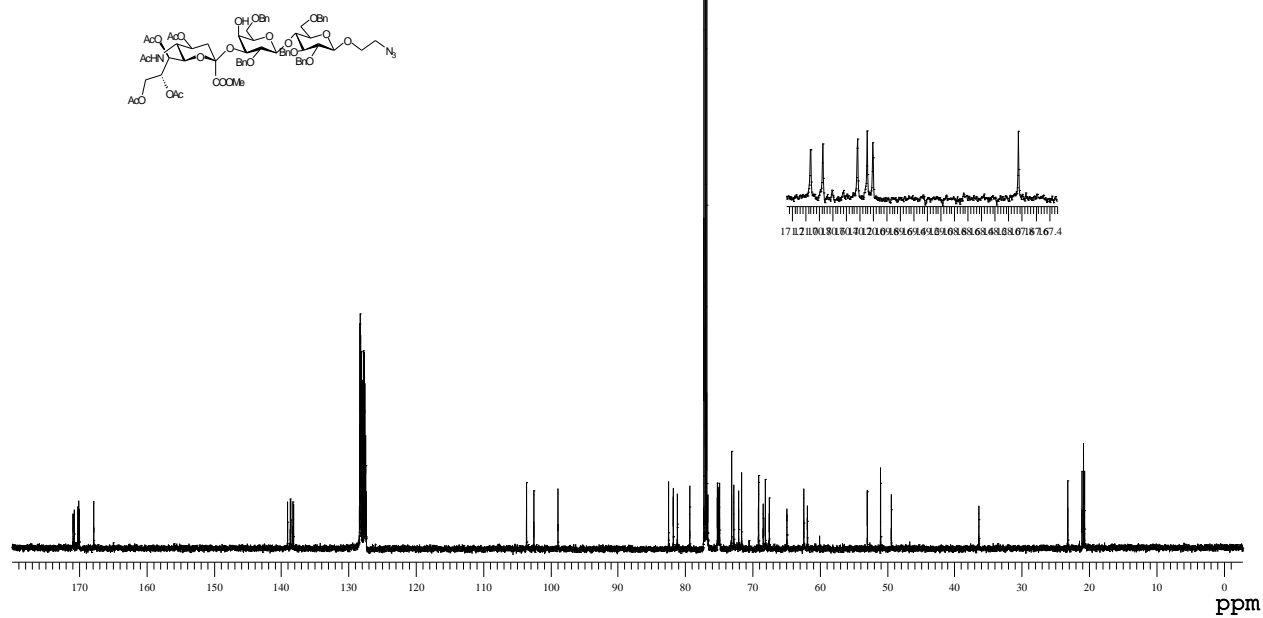

Figure S46. <sup>13</sup>C NMR spectrum of compound 16 (CDCl<sub>3</sub>, 150 MHz)

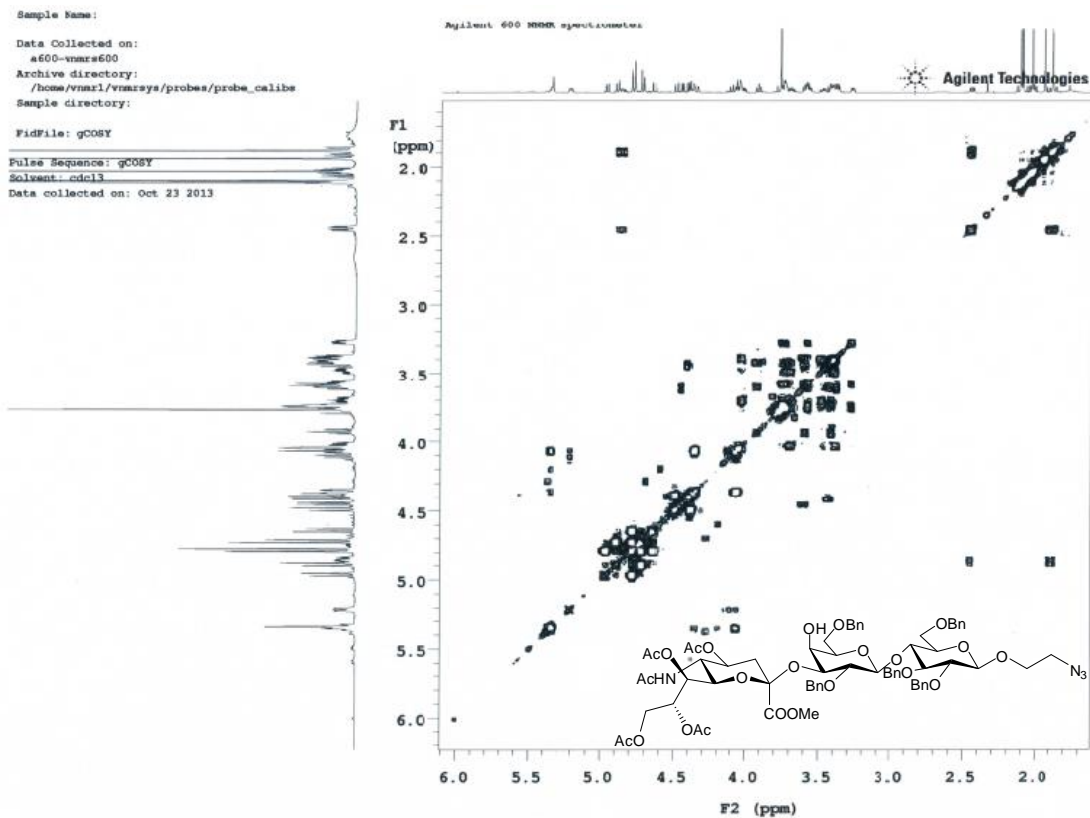

Figure S47.  $^1\text{H}$ - $^1\text{H}$  COSY spectrum of compound **16** ( $\text{CDCl}_3$ , 600 MHz)

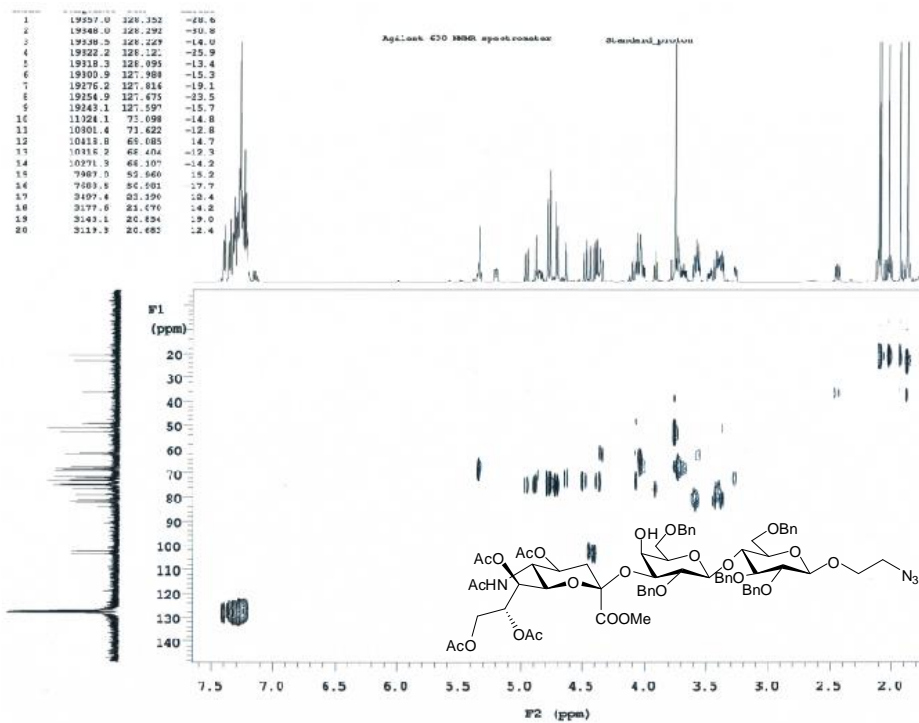

Figure S48.  $^1\text{H}$ - $^{13}\text{C}$  HMQC NMR spectrum of compound **16** ( $\text{CDCl}_3$ , 600/150 MHz)

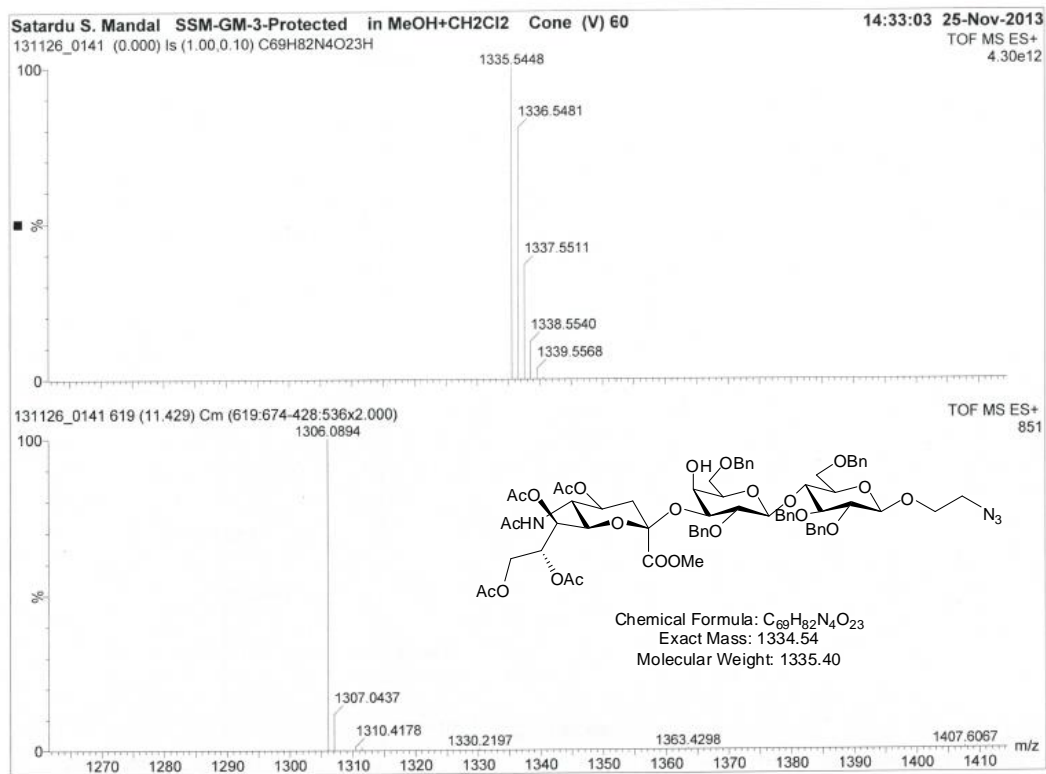

Figure S49. HRMS ESI-TOF MS spectrum of compound 16

Agilent 600 NMR spectrometer

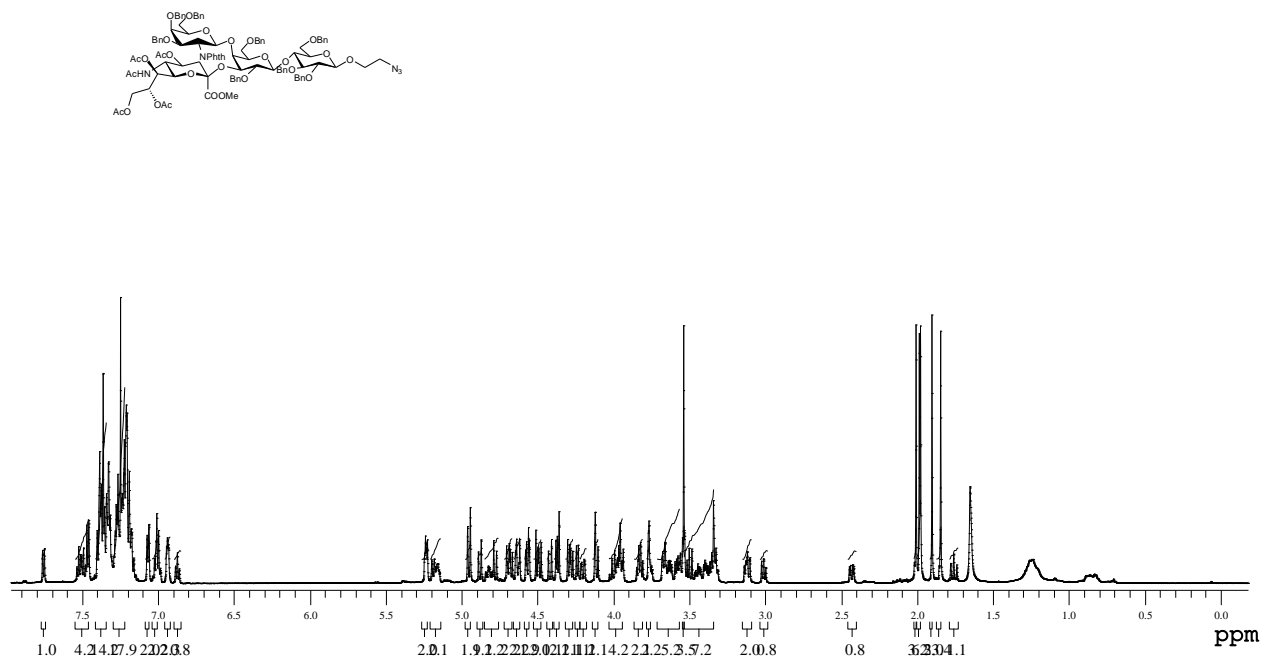

Figure S50. <sup>1</sup>H NMR spectrum of compound 17 (CDCl<sub>3</sub>, 600 MHz)

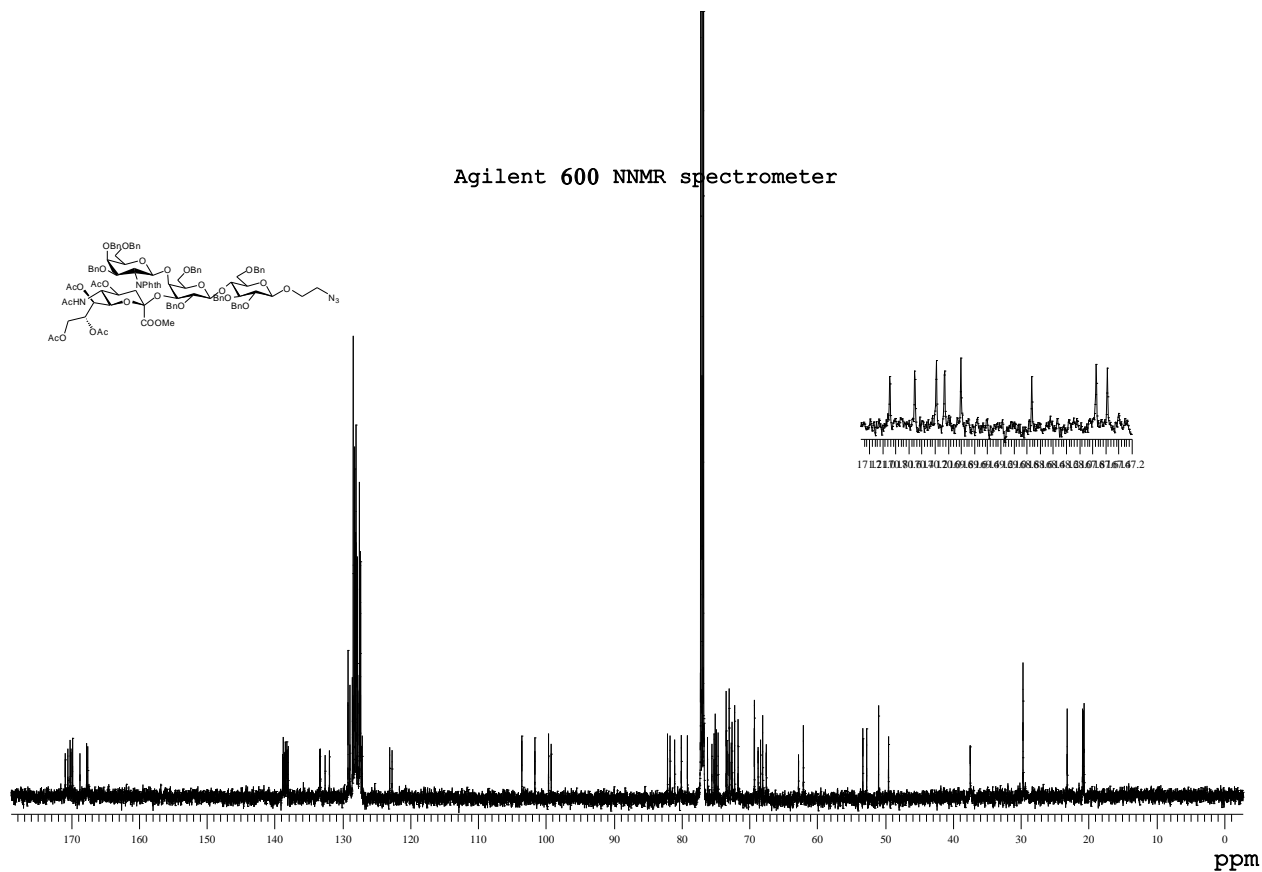

Figure S51.  $^{13}\text{C}$  NMR spectrum of compound 17 ( $\text{CDCl}_3$ , 150 MHz)

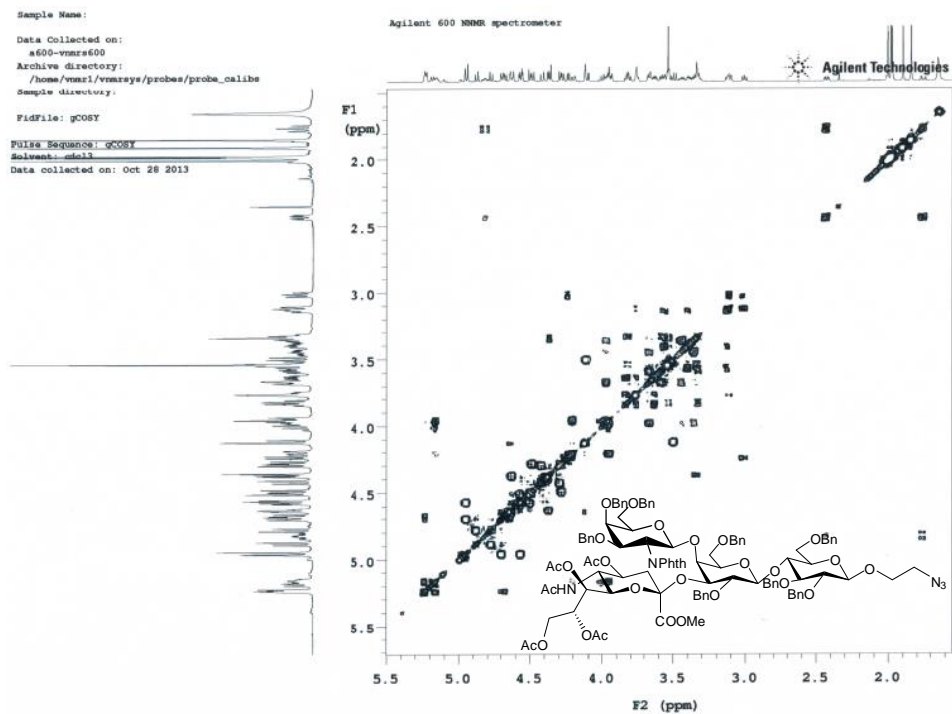

Figure S52.  $^1\text{H}$ - $^1\text{H}$  COSY spectrum of compound 17 ( $\text{CDCl}_3$ , 600 MHz)

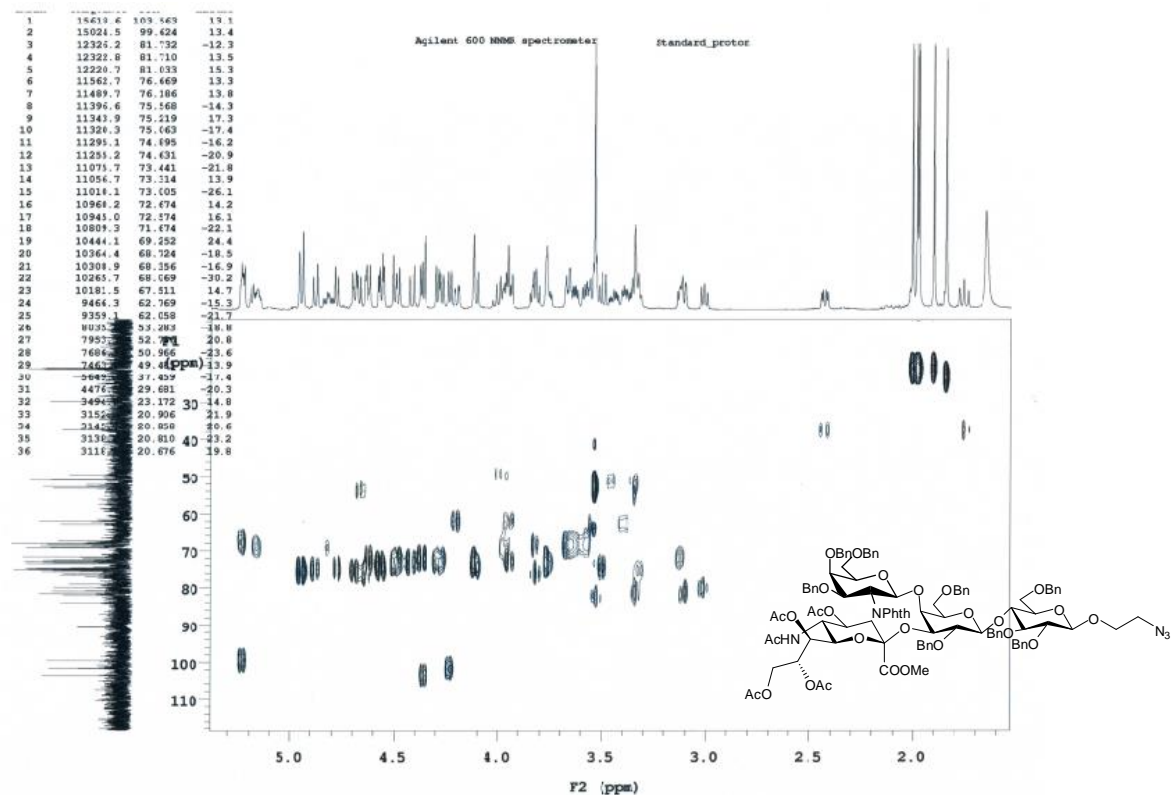

Figure S53.  $^1\text{H}$ - $^{13}\text{C}$  HMQC NMR spectrum of compound 17 ( $\text{CDCl}_3$ , 600/150 MHz)

Elemental Composition Report

Single Mass Analysis

Tolerance = 10.0 PPM / DBE: min = -1.5, max = 100.0  
 Element prediction: Off  
 Number of isotope peaks used for i-FIT = 6

Monoisotopic Mass, Even Electron Ions

310 formula(e) evaluated with 1 results within limits (all results (up to 1000) for each mass)

Elements Used:

C: 104-104 H: 0-114 N: 0-5 O: 0-30  $^{23}\text{Na}$ : 0-1

Satardu S. Mandal

SSM-GM-2-Protected

2013\_1127\_3265\_5 25 (0.565) Cm ((25+29.32+35.37+38.39+43.44)-1.7x2.000)

LGT2009 07b.ppt 2019 01/01/2019  
 1: TOF MS ES  
 2.77e+0

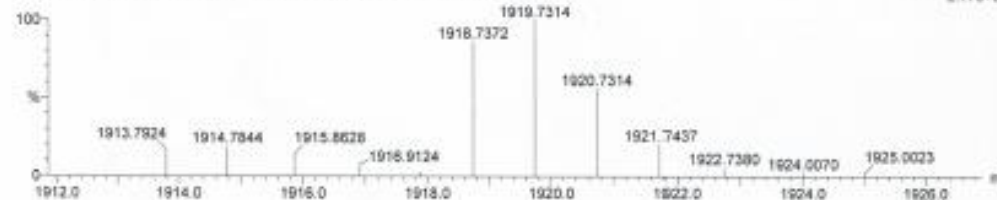

| Mass      | Calc. Mass | mDa  | PPM  | DBE  | i-FIT | i-FIT (Norm) | Formula                                                                   |
|-----------|------------|------|------|------|-------|--------------|---------------------------------------------------------------------------|
| 1918.7372 | 1918.7419  | -4.7 | -2.4 | 90.5 | 48.5  | 0.0          | $\text{C}_{104}\text{H}_{113}\text{N}_5\text{O}_{29}$<br>$^{23}\text{Na}$ |

Figure S54. HRMS ESI-TOF MS spectrum of compound 17.

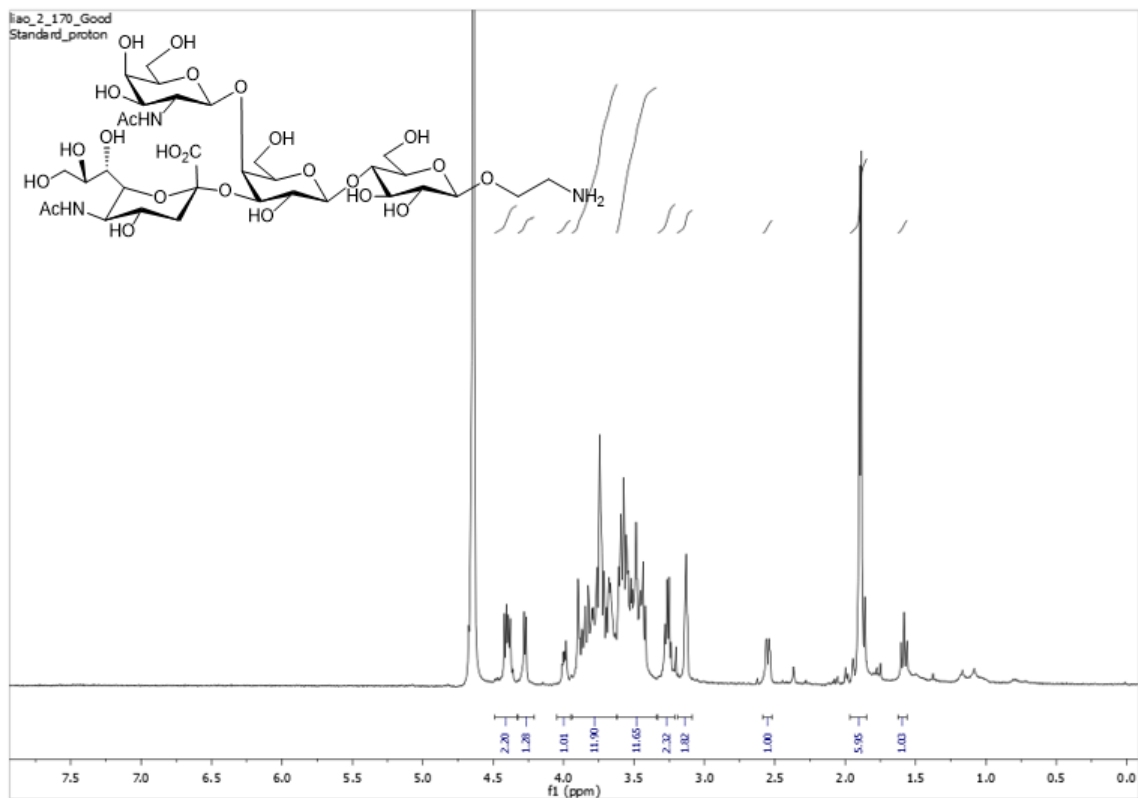

Figure S55.  $^1\text{H}$  NMR spectrum of compound 1 ( $\text{CDCl}_3$ , 600 MHz)

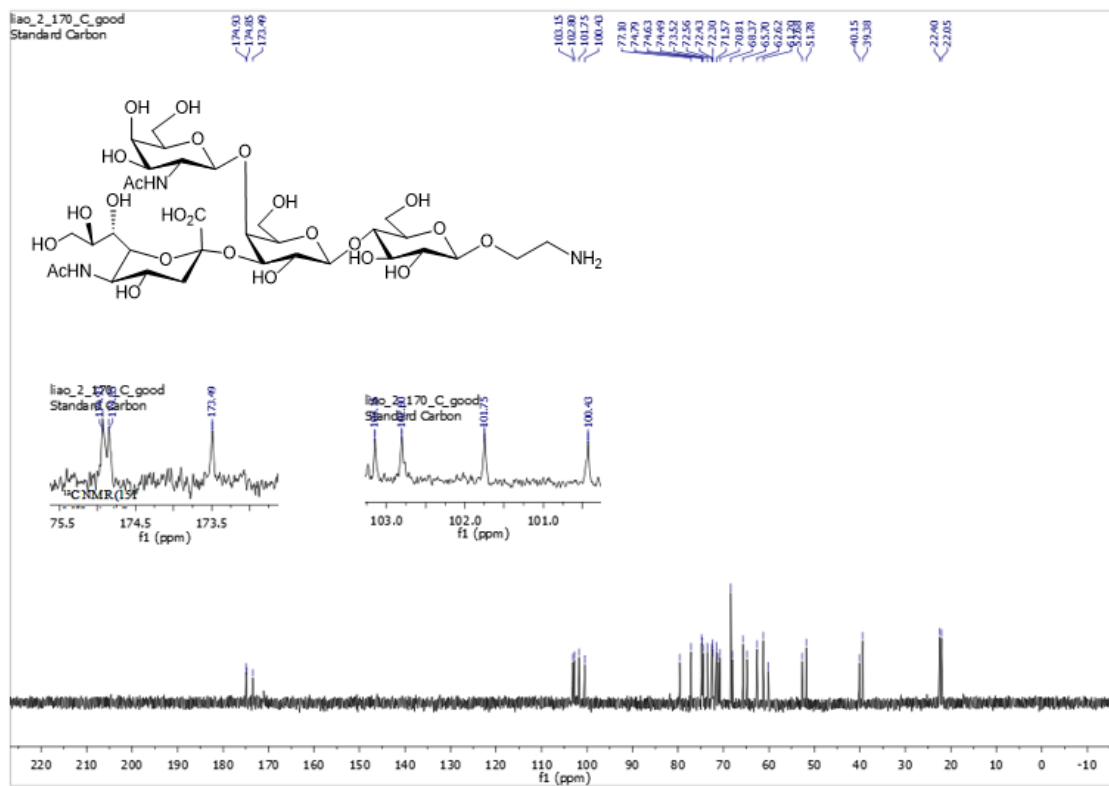

Figure S56.  $^{13}\text{C}$  NMR spectrum of compound 1 ( $\text{CDCl}_3$ , 150 MHz)

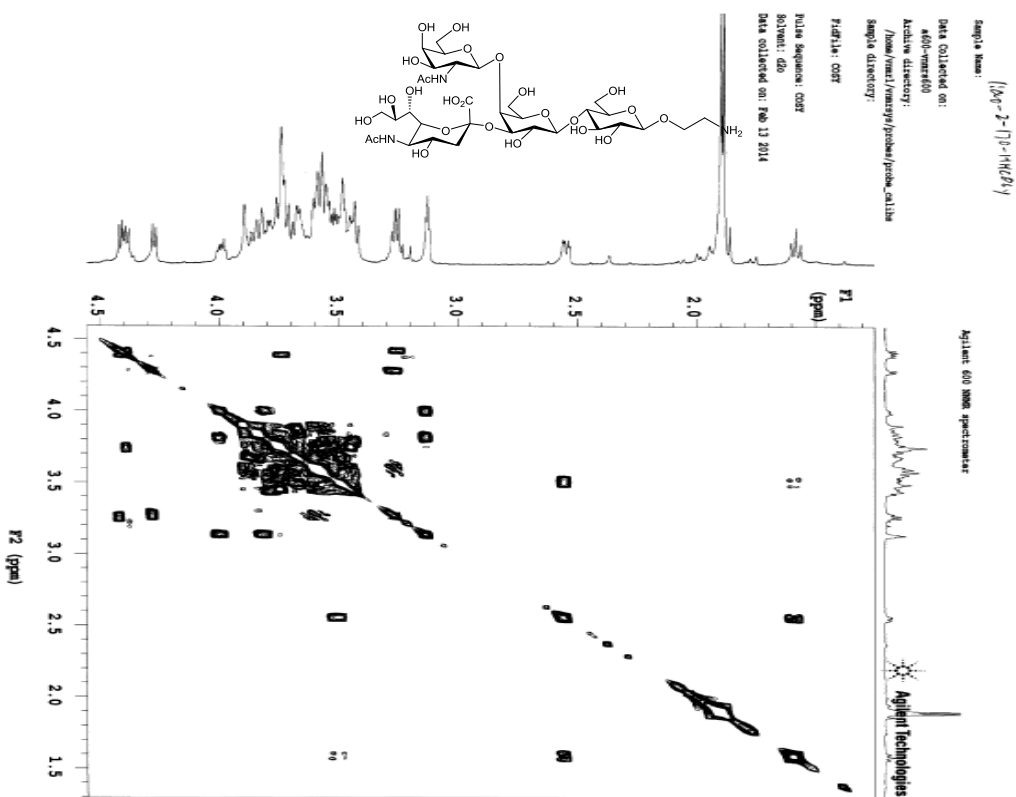

Figure S57.  $^1\text{H}$ - $^1\text{H}$  COSY spectrum of compound 1 ( $\text{CDCl}_3$ , 600 MHz)

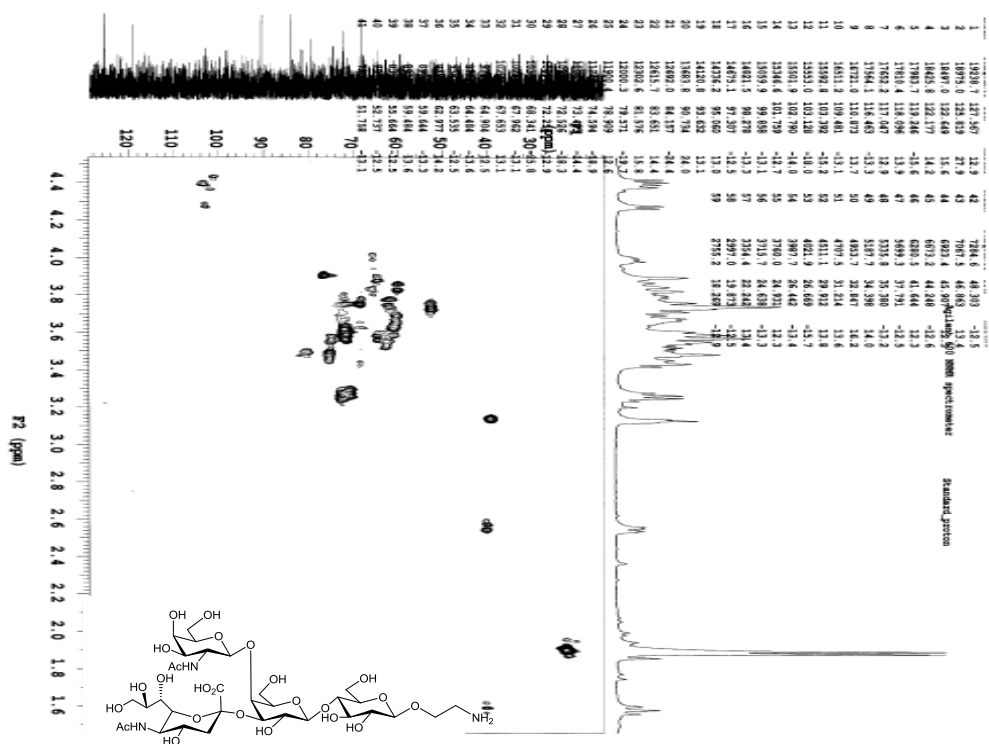

Figure S58.  $^1\text{H}$ - $^{13}\text{C}$  HMQC NMR spectrum of compound 1 ( $\text{CDCl}_3$ , 600/150 MHz)



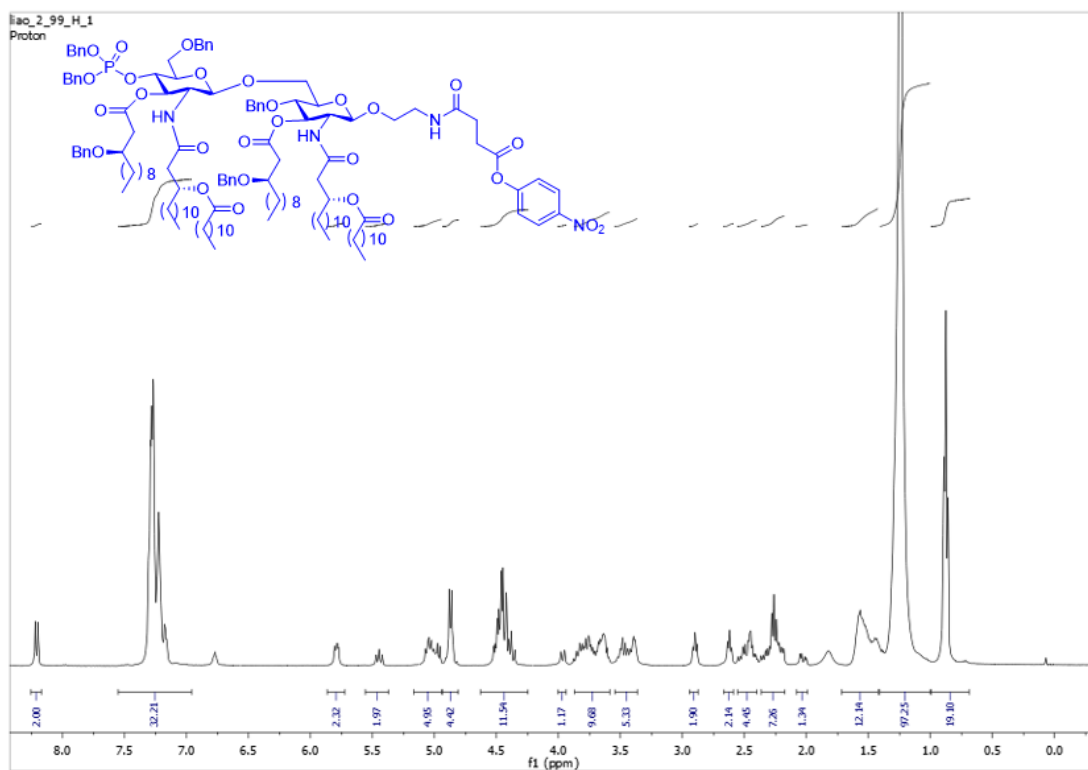

Figure S59. <sup>1</sup>H NMR spectrum of compound 19 (CDCl<sub>3</sub>, 600 MHz)

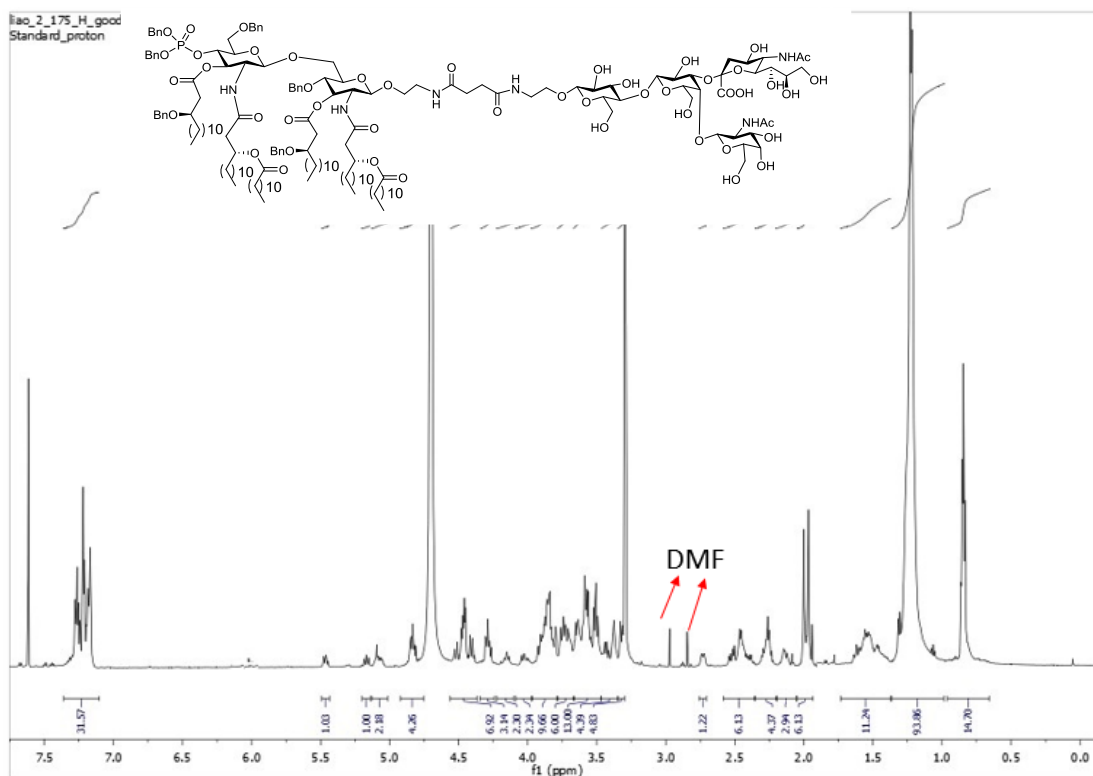

Figure S60. <sup>1</sup>H NMR spectrum of compound 20 (CDCl<sub>3</sub>, 600 MHz)

P31 spectrum  
File: xp  
Pulse Sequence: s2pul

100-2-175-P

Mercury 400 spectrometer

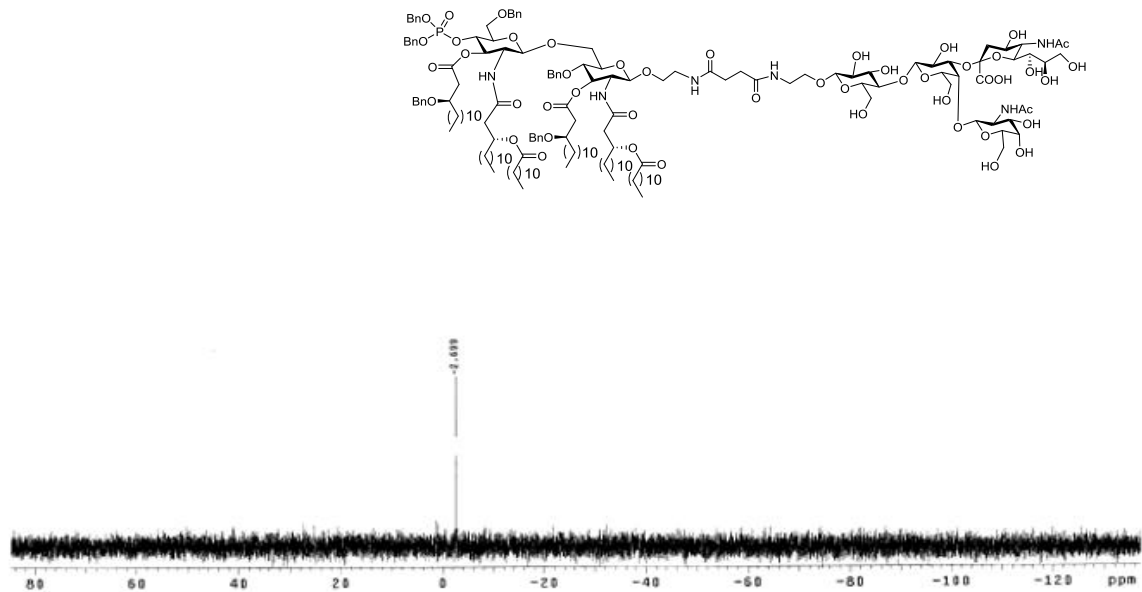

Figure S61.  $^{31}\text{P}$  NMR spectrum of compound 20 ( $\text{CDCl}_3$ , 242 MHz)

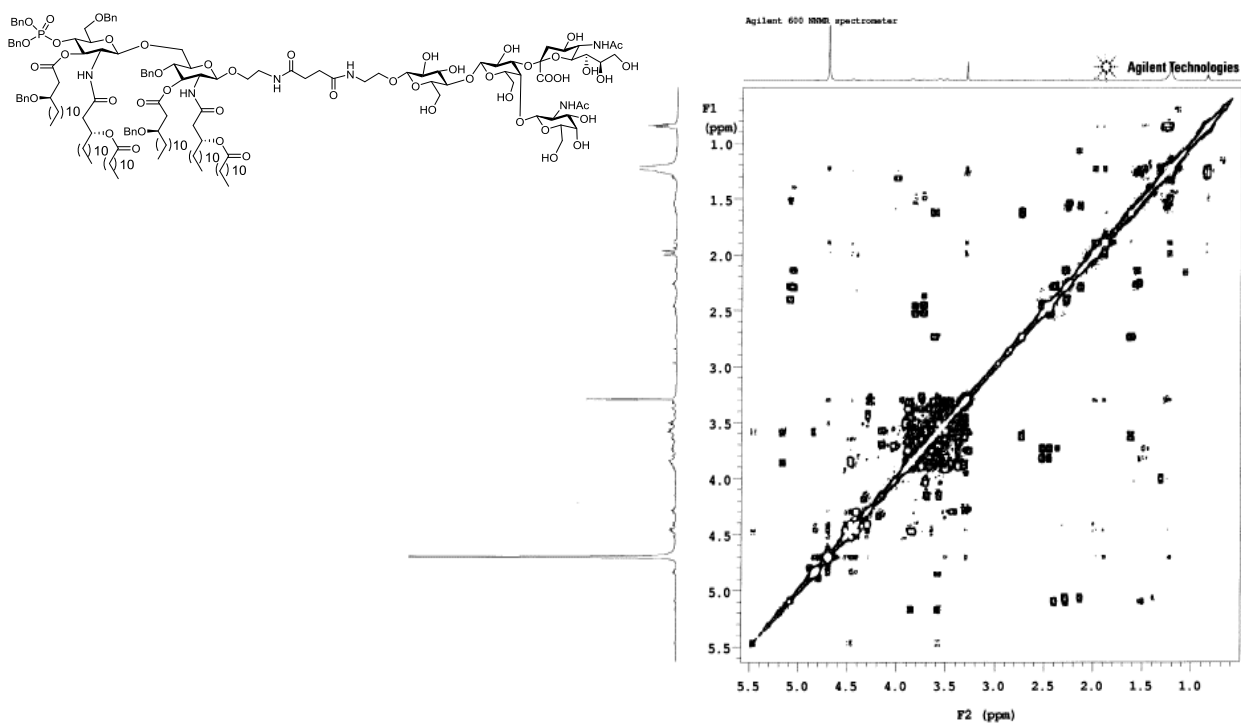

Figure S62.  $^1\text{H}$ - $^1\text{H}$  COSY spectrum of compound 20 ( $\text{CDCl}_3$ , 600 MHz)

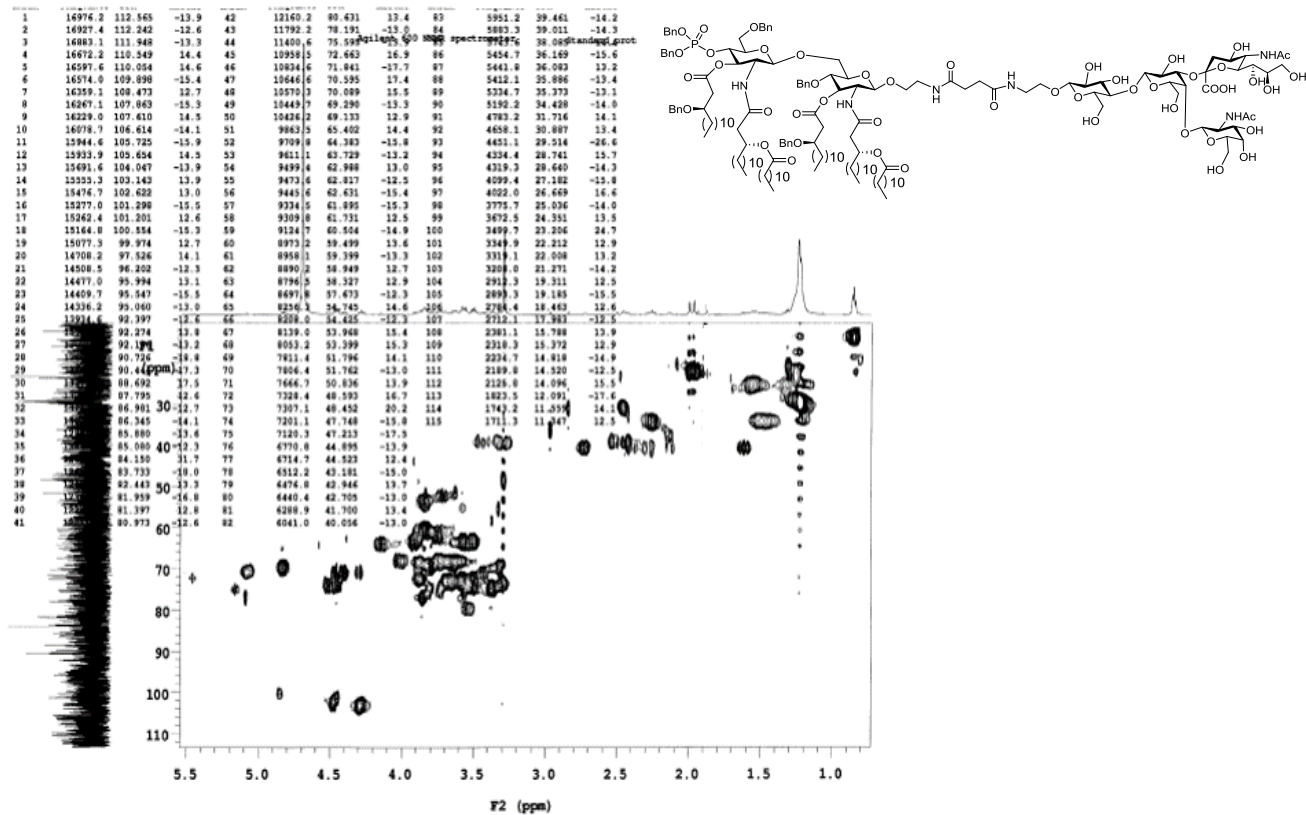

Figure S63.  $^1\text{H}$ - $^{13}\text{C}$  HMQC NMR spectrum of compound **20** ( $\text{CDCl}_3$ , 600/150 MHz)

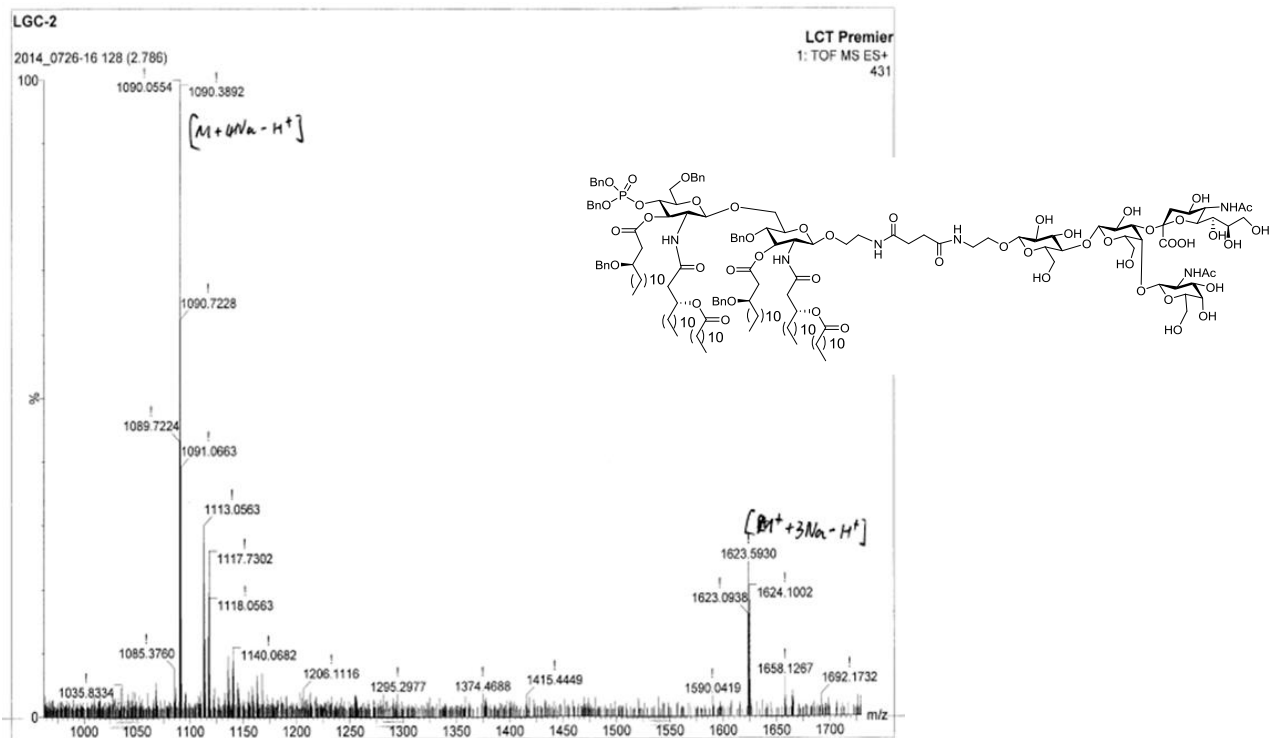

Figure S64. MALDI-TOF MS spectrum of compound **20**

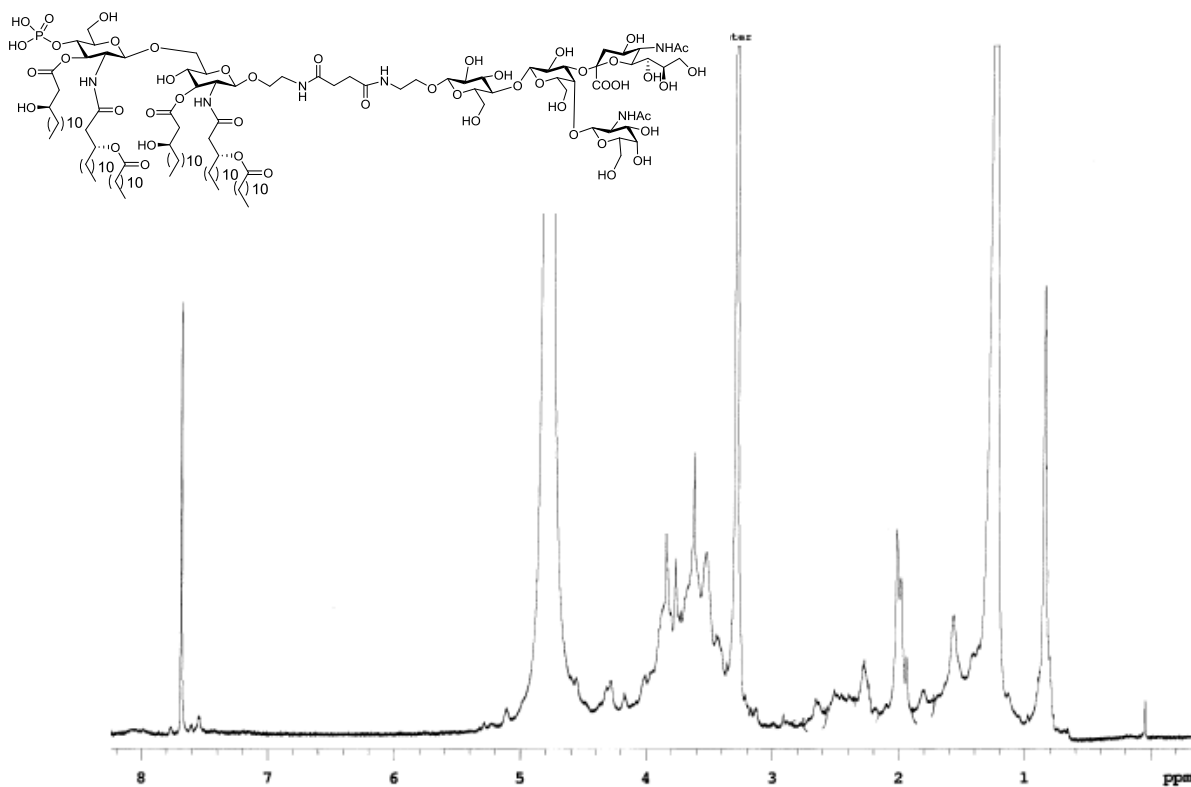

**Figure S65.** <sup>1</sup>H NMR spectrum of compound **2** (CDCl<sub>3</sub>, 600 MHz)

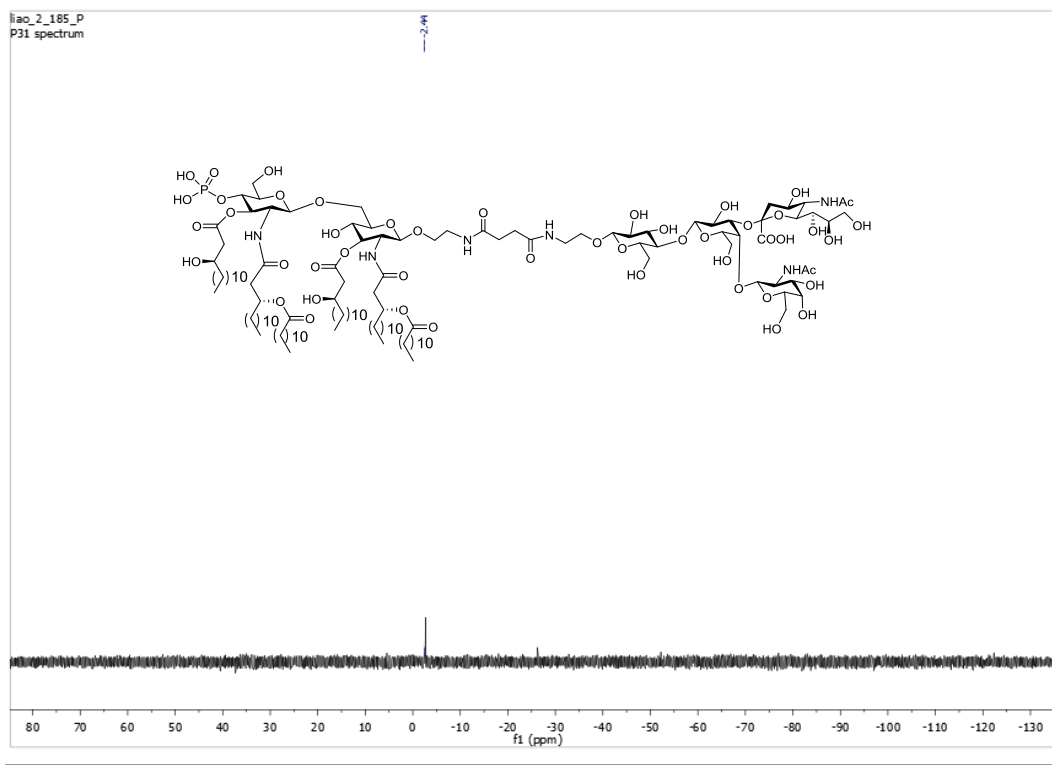

**Figure S66.** <sup>31</sup>P NMR spectrum of compound **2** (CDCl<sub>3</sub>, 242 MHz)

D:\Data\ChemUsers\guo\liao\GM2\_lipid\_4-RN mode\0\_C3\1\_1\1SRef

Comment 1  
Comment 2

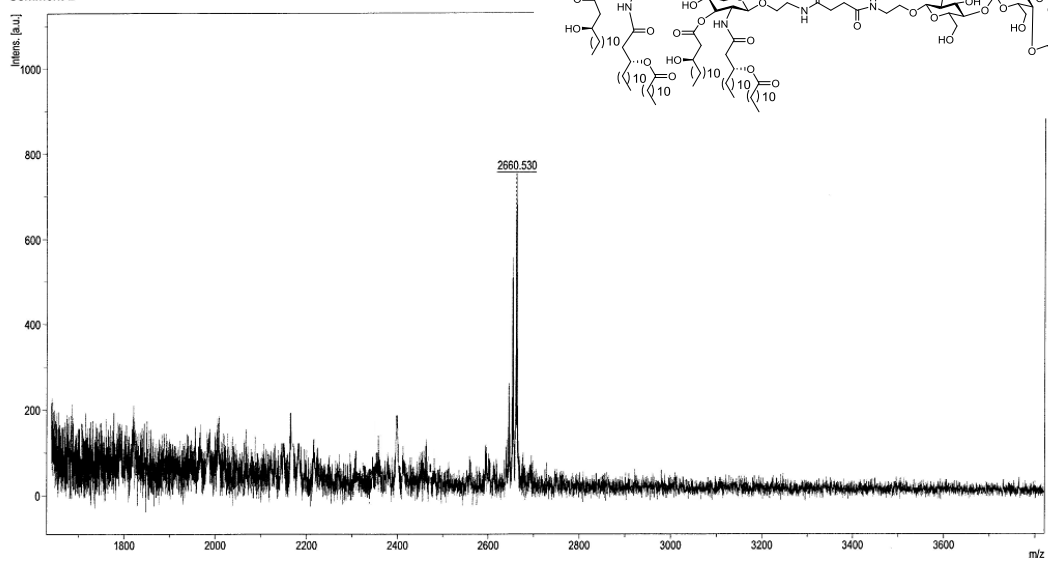

printed: 5/10/2016 12:21:43

Figure S67. MALDI-TOF MS spectrum of compound 2

D:\Data\ChemUsers\guo\liao\HSA protein\0\_A10\1\1Lin

Comment 1 HSA protein  
Comment 2 HSA protein

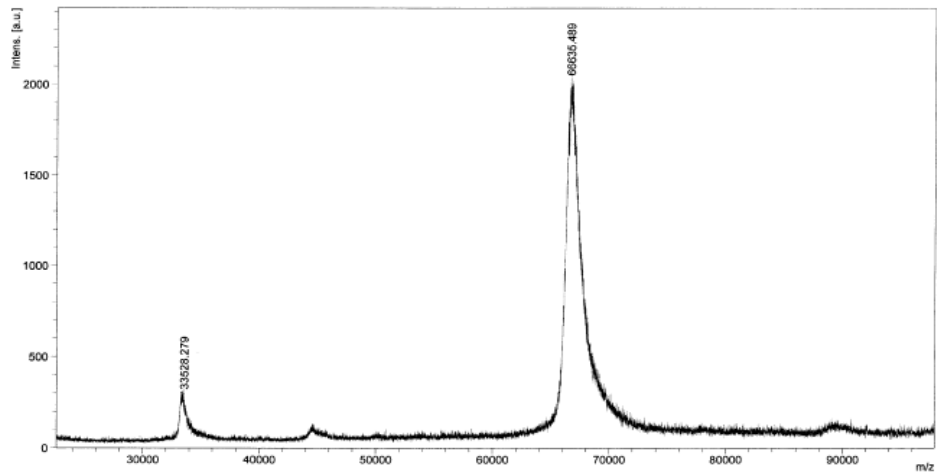

Bruker Daltonics flexAnalysis

printed: 2/23/2015 8:13:37 PM

Figure S68. MALDI-TOF MS spectrum of HSA

Comment 1 GM2\_HSA  
Comment 2 GM2\_HSA

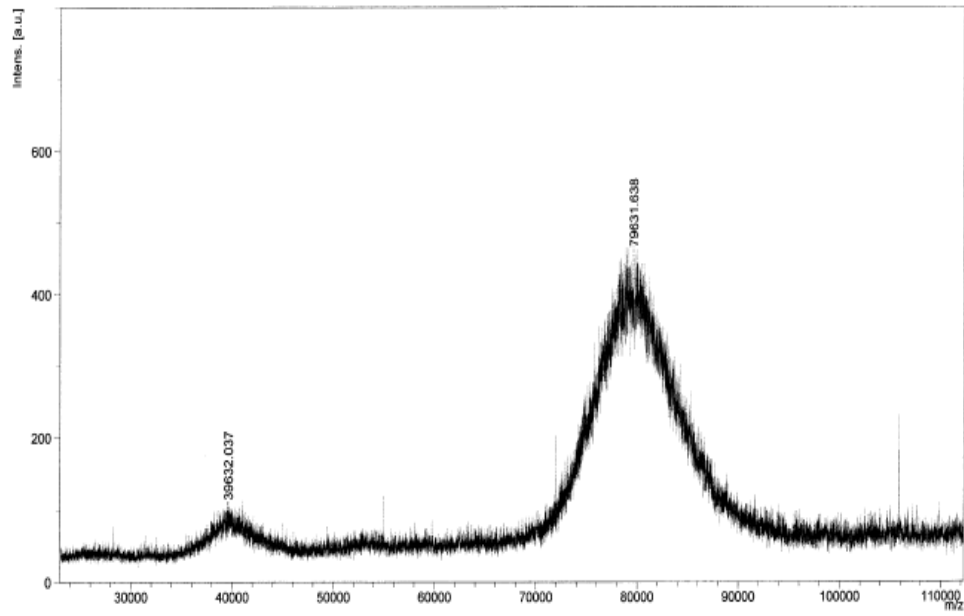

**Figure S69.** MALDI-TOF MS spectrum of HSA-GM2 conjugate 4
